# Supplementary material for: PIDA-mediated intramolecular oxidative C–N bond formation for the direct synthesis of quinoxalines from enaminones
Source: Royal Society of Chemistry journal article supplement (doi:10.1039/c9ra01200a), 2019-01-01
Supplement: c9ra01200a1.pdf [file c9ra01200a1.pdf]

# **PIDA-mediated Intramolecular Oxidative C-N Bond Formation for the Direct Synthesis of Quinoxalines from Enaminones**

Hong Zhang,<sup>a</sup> Jinhai Shen,<sup>a</sup> Zhenhui Yang,<sup>a</sup> and Xiuling Cui<sup>a\*</sup>

*Engineering Research Center of Molecular Medicine of Ministry of Education, Key Laboratory of Fujian Molecular Medicine, Key Laboratory of Xiamen Marine and Gene Drugs, School of Biomedical Sciences, Huaqiao University, Xiamen 361021, P. R. China, \*e-mail: cuixl@hqu.edu.cn*

## **Contents**

|                                                                                                     |    |
|-----------------------------------------------------------------------------------------------------|----|
| 1. General information: .....                                                                       | 2  |
| 2. General Procedure for the Preparation of Quinoxalines <b>2</b> .....                             | 2  |
| 3. Chemical transformations of product <b>2a</b> :.....                                             | 2  |
| 4. Preparation of 1-(2-Benzoyl-3-phenylquinoxalin-1(2H)-yl)ethan-1-one <b>5a</b> .....              | 3  |
| 5. Characterization of the products .....                                                           | 4  |
| 6. NMR Spectra of compounds <b>1a-1s</b> , <b>2a-2s</b> , <b>3a</b> , <b>4a</b> , <b>5a</b> : ..... | 23 |
| 7. HRMS spectrum of intermediate <b>C</b> .....                                                     | 70 |

### 1. General information:

Unless otherwise stated, all commercial materials and solvents were used directly without further purification. Melting points were determined in open glass capillaries and were uncorrected. <sup>1</sup>H NMR spectra were recorded on 400 MHz spectrometers, and <sup>13</sup>C NMR spectra were recorded on a 100 MHz spectrometer. Chemical shifts (in ppm) were referenced to tetramethylsilane ( $\delta = 0$  ppm) in CDCl<sub>3</sub> and DMSO-d<sub>6</sub> as an internal standard at room temperature. <sup>13</sup>C NMR spectra were obtained by using the same NMR spectrometers and were calibrated with CDCl<sub>3</sub> ( $\delta = 77.0$  ppm) and DMSO-d<sub>6</sub> ( $\delta = 39.5$  ppm). High-resolution mass spectra (HRMS) were equipped with an ESI source and a TOF detector. Column chromatography was performed on silica gel (70-230 mesh ASTM) using the reported eluents. Thin-layer chromatography (TLC) was carried out on 4×15 cm plates with a layer thickness of 0.2 mm (silica gel 60 F<sub>254</sub>). The *N*-(2-acetaminophenyl)enaminones **1** were prepared according to the literatures.<sup>1-2</sup>

### 2. General Procedure for the Preparation of Quinoxalines **2**

A mixture of *N*-(2-acetaminophenyl) enaminones **1** (0.2 mmol), PIDA (71 mg, 0.22 mmol), PhCOOH (25 mg, 0.2 mmol) in toluene (2 mL) was stirred at 80 °C under air atmosphere for 12 h (monitored by TLC). After evaporation of toluene, H<sub>2</sub>O was added and the resultant was extracted with EtOAc (3×10 mL). The combined EtOAc extracts were dried over Na<sub>2</sub>SO<sub>4</sub> and concentrated. Then solvent was evaporated and the residue was purified by chromatography (silica gel, 10 % EtOAc in PE) to give **2**.

### 3. Chemical transformations of product **2a**:

The compounds **3a** and **4a** were prepared according to the literatures.<sup>3</sup> A

suspension of **2a** (62 mg, 0.2 mmol) in EtOH (2 mL) was heated at 50 °C, then KBH<sub>4</sub> was added (23 mg, 0.4 mmol). This mixture was stirred at 50 °C for 3 h (monitored by TLC). After evaporation of EtOH, H<sub>2</sub>O was added and the resultant was extracted with EtOAc (3×10 mL). The combined EtOAc extracts were dried over Na<sub>2</sub>SO<sub>4</sub> and concentrated. Then solvent was evaporated and the residue was purified by chromatography (silica gel, 10 % EtOAc in PE) to give **3a**.

A suspension of **2a** (62 mg, 0.2 mmol) in EtOH (2 mL) was heated at 50 °C, then KBH<sub>4</sub> was added (23 mg, 0.4 mmol). This mixture was stirred at 50 °C for 3 h (monitored by TLC). After evaporation of EtOH, concentrated H<sub>2</sub>SO<sub>4</sub> ( 0.5 mL ) was added and stirred at 0 °C for 5 h (monitored by TLC). Then the solution was poured slowly in water at 0 °C. The final mixture was extracted with CH<sub>2</sub>Cl<sub>2</sub> (3×10 mL). The combined CH<sub>2</sub>Cl<sub>2</sub> extracts were dried over Na<sub>2</sub>SO<sub>4</sub> and concentrated. Then solvent was evaporated and the residue was purified by chromatography (silica gel, 6 % EtOAc in PE) to give **4a**.

#### 4. Preparation of 1-(2-Benzoyl-3-phenylquinoxalin-1(2H)-yl)ethan-1-one **5a**

A mixture of *N*-(2-acetaminophenyl) enaminones **1a** (178 mg, 0.5 mmol), PIDA (177 mg, 0.55mmol), PhCOOH (61 mg, 0.5 mmol) in toluene (5 mL) was stirred at 80 °C under air atmosphere for 2 h. After evaporation of toluene, H<sub>2</sub>O was added and the resultant was extracted with EtOAc (3×15 mL). The combined EtOAc extracts were dried over Na<sub>2</sub>SO<sub>4</sub> and concentrated. Then solvent was evaporated and the residue was purified by chromatography (silica gel, 10 % EtOAc in PE) to give **5a**.

#### Reference

1. Y. Zheng, C. Yang, D. Zhang-Negrerie, Y. Du, K. Zhao, *Tetrahedron Letters*, **2013**, 54, 6157.
2. X. Li, Y. Du, Z. Liang, X. Li, Y. Pan, K. Zhao, *Organic Letters*, **2009**, 11, 2643.
3. Nicole V, Pierre M. *Bulletin de la Societe Chimique de France*, **1977**, (11-12, Pt. 2), 1245.

## 5. Characterization of the products

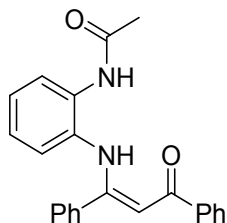

### (*Z*)-*N*-(2-((3-oxo-1,3-diphenylprop-1-en-1-yl)amino)phenyl)acetamide (**1a**)

289 mg, 80 % yield; Yellow solid; mp: 177-179 °C;  $^1\text{H}$  NMR (400 MHz,  $\text{CDCl}_3$ )  $\delta$  12.64 (s, 1H), 8.19 (s, 1H), 7.91 (dd,  $J = 18.2, 7.7$  Hz, 3H), 7.44 (dt,  $J = 24.8, 7.2$  Hz, 3H), 7.35 – 7.20 (m, 5H), 7.01 (t,  $J = 7.7$  Hz, 1H), 6.76 (t,  $J = 7.5$  Hz, 1H), 6.50 (d,  $J = 7.9$  Hz, 1H), 6.18 (s, 1H), 2.26 (s, 3H);  $^{13}\text{C}$  NMR (100 MHz,  $\text{CDCl}_3$ )  $\delta$  190.1, 169.1, 162.8, 139.6, 135.2, 131.6, 131.4, 131.2, 129.8, 128.4, 128.4, 128.0, 127.2, 125.9, 125.5, 124.5, 123.4, 97.7, 24.3. HRMS  $m/z$  (ESI) calcd for  $\text{C}_{23}\text{H}_{21}\text{N}_2\text{O}_2$  ( $\text{M} + \text{H}$ ) $^+$  357.1598, found 357.1598.

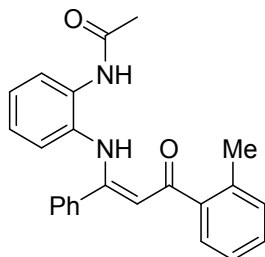

### (*Z*)-*N*-(2-((3-oxo-1-phenyl-3-(*o*-tolyl)prop-1-en-1-yl)amino)phenyl)acetamide (**1b**)

281 mg, 76 % yield; Yellow solid; mp: 188-189 °C;  $^1\text{H}$  NMR (400 MHz,  $\text{CDCl}_3$ )  $\delta$  12.55 (s, 1H), 8.08 (s, 1H), 7.79 (d,  $J = 7.9$  Hz, 1H), 7.50 (d,  $J = 7.5$  Hz, 1H), 7.37 – 7.13 (m, 8H), 7.01 (t,  $J = 7.7$  Hz, 1H), 6.78 (t,  $J = 7.4$  Hz, 1H), 6.52 (d,  $J = 7.8$  Hz, 1H), 5.85 (s, 1H), 2.53 (s, 3H), 2.24 (s, 3H);  $^{13}\text{C}$  NMR (100 MHz,  $\text{CDCl}_3$ )  $\delta$  195.0, 169.1, 162.1, 141.1, 136.0, 135.0, 131.6, 131.3, 131.1, 129.8, 129.6, 128.4, 128.0, 127.6, 125.7, 125.5, 125.4, 124.7, 123.8, 101.5, 24.2, 20.4. HRMS  $m/z$  (ESI) calcd for  $\text{C}_{24}\text{H}_{23}\text{N}_2\text{O}_2$  ( $\text{M} + \text{H}$ ) $^+$  371.1754, found 371.1755.

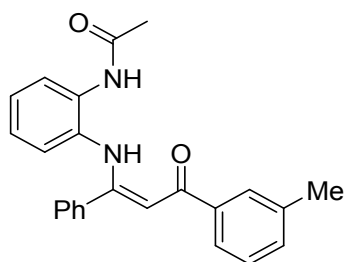

*(Z)*-*N*-(2-((3-oxo-1-phenyl-3-(*m*-tolyl)prop-1-en-1-yl)amino)phenyl)acetamide (**1c**)

278 mg, 75 % yield; Yellow solid; mp: 170-171 °C; <sup>1</sup>H NMR (400 MHz, CDCl<sub>3</sub>) δ 12.64 (s, 1H), 8.10 (s, 1H), 7.91 (d, *J* = 8.0 Hz, 1H), 7.74 (d, *J* = 5.6 Hz, 2H), 7.37 – 7.21 (m, 7H), 7.05 – 6.98 (m, 1H), 6.77 (t, *J* = 7.6 Hz, 1H), 6.51 (d, *J* = 7.9 Hz, 1H), 6.18 (s, 1H), 2.38 (s, 3H), 2.27 (s, 3H); <sup>13</sup>C NMR (100 MHz, CDCl<sub>3</sub>) δ 190.4, 169.0, 162.7, 139.6, 138.1, 135.3, 132.3, 131.6, 131.1, 129.8, 128.4, 128.3, 128.0, 127.9, 125.9, 125.6, 124.4, 124.4, 123.3, 97.8, 24.4, 21.4. HRMS *m/z* (ESI) calcd for C<sub>24</sub>H<sub>23</sub>N<sub>2</sub>O<sub>2</sub> (M + H)<sup>+</sup> 371.1754, found 371.1754.

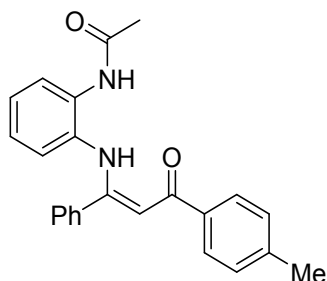

*(Z)*-*N*-(2-((3-oxo-1-phenyl-3-(*p*-tolyl)prop-1-en-1-yl)amino)phenyl)acetamide (**1d**)

307 mg, 83 % yield; Yellow solid; mp: 151-153 °C; <sup>1</sup>H NMR (400 MHz, CDCl<sub>3</sub>) δ 12.59 (s, 1H), 8.28 (s, 1H), 7.92 (d, *J* = 7.9 Hz, 1H), 7.84 (d, *J* = 8.1 Hz, 2H), 7.34 – 7.16 (m, 7H), 7.00 (t, *J* = 7.5 Hz, 1H), 6.75 (t, *J* = 7.5 Hz, 1H), 6.49 (d, *J* = 7.8 Hz, 1H), 6.16 (s, 1H), 2.38 (s, 3H), 2.27 (s, 3H); <sup>13</sup>C NMR (100 MHz, CDCl<sub>3</sub>) δ 190.0, 169.1, 162.4, 142.0, 136.9, 135.3, 131.6, 131.1, 129.7, 129.1, 128.3, 128.0, 127.3, 125.8, 125.4, 124.3, 123.3, 97.7, 24.3, 21.4. HRMS *m/z* (ESI) calcd for C<sub>24</sub>H<sub>23</sub>N<sub>2</sub>O<sub>2</sub> (M + H)<sup>+</sup> 371.1754, found 371.1752.

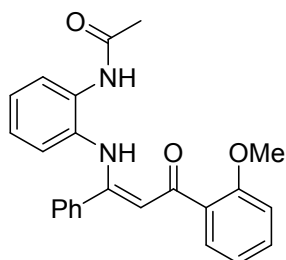

(*Z*)-*N*-(2-((3-(2-methoxyphenyl)-3-oxo-1-phenylprop-1-en-1-yl)amino)phenyl)-acetamide (**1e**)

250 mg, 65 % yield; Yellow solid; mp: 220-222 °C; <sup>1</sup>H NMR (400 MHz, DMSO-*d*<sub>6</sub>) δ 12.22 (s, 1H), 9.87 (s, 1H), 7.63 (dd, *J* = 7.6, 1.3 Hz, 1H), 7.49 – 7.32 (m, 7H), 7.12 (d, *J* = 8.3 Hz, 1H), 7.06 – 6.95 (m, 2H), 6.82 (t, *J* = 7.6 Hz, 1H), 6.40 (d, *J* = 8.0 Hz, 1H), 6.10 (s, 1H), 3.84 (s, 3H), 2.15 (s, 3H); <sup>13</sup>C NMR (100 MHz, DMSO-*d*<sub>6</sub>) δ 189.7, 169.4, 159.9, 157.5, 136.2, 134.9, 132.5, 131.5, 130.4, 130.2, 130.1, 129.0, 128.5, 126.6, 125.7, 125.5, 124.8, 120.9, 112.6, 103.0, 56.2, 23.6. HRMS *m/z* (ESI) calcd for C<sub>24</sub>H<sub>23</sub>N<sub>2</sub>O<sub>3</sub> (M + H)<sup>+</sup> 387.1703, found 387.1703.

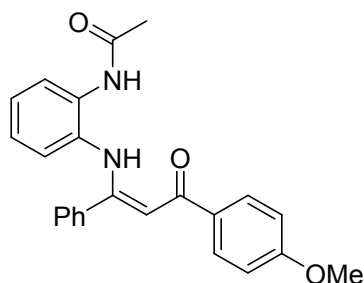

(*Z*)-*N*-(2-((3-(4-methoxyphenyl)-3-oxo-1-phenylprop-1-en-1-yl)amino)phenyl)-acetamide (**1f**)

273 mg, 71 % yield; Yellow solid; mp: 172-173 °C; <sup>1</sup>H NMR (400 MHz, CDCl<sub>3</sub>) δ 12.54 (s, 1H), 8.16 (s, 1H), 7.93 (d, *J* = 8.7 Hz, 3H), 7.37 – 7.20 (m, 5H), 7.01 (t, *J* = 7.5 Hz, 1H), 6.91 (d, *J* = 8.8 Hz, 2H), 6.75 (t, *J* = 7.5 Hz, 1H), 6.50 (d, *J* = 7.9 Hz, 1H), 6.15 (s, 1H), 3.84 (s, 3H), 2.27 (s, 3H); <sup>13</sup>C NMR (100 MHz, CDCl<sub>3</sub>) δ 189.2, 169.0, 162.4, 162.2, 135.4, 132.2, 131.7, 131.1, 129.7, 129.3, 128.4, 128.0, 125.9,

125.4, 124.3, 123.1, 113.6, 97.5, 55.3, 24.4. HRMS  $m/z$  (ESI) calcd for  $C_{24}H_{23}N_2O_3$  ( $M + H$ )<sup>+</sup> 387.1703, found 387.1703.

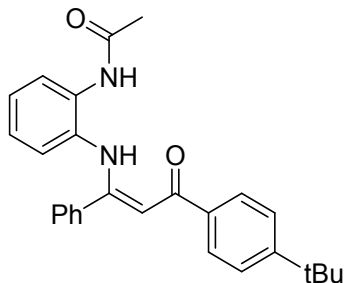

(*Z*)-*N*-(2-((3-(4-*tert*-butyl)phenyl)-3-oxo-1-phenylprop-1-en-1-yl)amino)phenyl)acetamide (**1g**)

306 mg, 74 % yield; Yellow solid; mp: 238-240 °C; <sup>1</sup>H NMR (400 MHz, CDCl<sub>3</sub>) δ 12.60 (s, 1H), 7.96 (d, *J* = 8.0 Hz, 1H), 7.90 (d, *J* = 8.4 Hz, 2H), 7.85 (s, 1H), 7.46 (d, *J* = 8.4 Hz, 2H), 7.38 – 7.24 (m, 5H), 7.03 (dd, *J* = 11.4, 4.1 Hz, 1H), 6.78 (t, *J* = 7.5 Hz, 1H), 6.55 (d, *J* = 7.8 Hz, 1H), 6.22 (s, 1H), 2.27 (s, 3H), 1.35 (s, 9H); <sup>13</sup>C NMR (100 MHz, CDCl<sub>3</sub>) δ 190.2, 168.8, 162.6, 155.2, 136.8, 135.4, 131.9, 131.0, 129.9, 128.5, 128.0, 127.2, 126.1, 125.7, 125.4, 124.4, 123.0, 97.8, 34.9, 31.2, 31.2, 31.2, 24.5. HRMS  $m/z$  (ESI) calcd for  $C_{27}H_{29}N_2O_2$  ( $M + H$ )<sup>+</sup> 413.2224, found 413.2224.

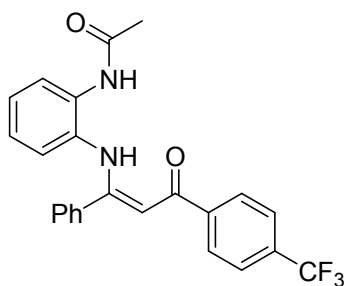

(*Z*)-*N*-(2-((3-oxo-1-phenyl-3-(4-(trifluoromethyl)phenyl)prop-1-en-1-yl)amino)phenyl)acetamide (**1h**)

295 mg, 70 % yield; Yellow solid; mp: 200-201 °C; <sup>1</sup>H NMR (400 MHz, DMSO-*d*<sub>6</sub>) δ 12.55 (s, 1H), 9.93 (s, 1H), 8.23 (d, *J* = 8.1 Hz, 2H), 7.85 (d, *J* = 8.2 Hz, 2H), 7.51 (d, *J* = 6.8 Hz, 2H), 7.45 – 7.32 (m, 4H), 7.04 (t, *J* = 7.5 Hz, 1H), 6.86 (t, *J* = 7.5 Hz, 1H), 6.48 (d, *J* = 7.9 Hz, 1H), 6.27 (s, 1H), 2.16 (s, 3H); <sup>13</sup>C NMR (100 MHz,

DMSO- $d_6$ )  $\delta$  183.5, 165.9, 159.2, 139.7, 132.3, 131.0, 128.5, 128.1 (q,  $J = 31.8$  Hz), 126.9, 125.5, 125.2, 125.0, 123.0, 122.5, 122.4 (q,  $J = 3.8$  Hz), 122.3, 122.0, 121.0 (q,  $J = 272.9$  Hz), 93.8, 20.1;  $^{19}\text{F}$  NMR (376 MHz, DMSO- $d_6$ )  $\delta$  -61.3. HRMS  $m/z$  (ESI) calcd for  $\text{C}_{24}\text{H}_{20}\text{F}_3\text{N}_2\text{O}_2$  ( $\text{M} + \text{H}$ ) $^+$  425.1471, found 425.1471.

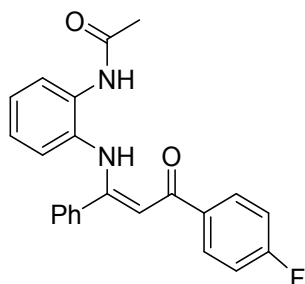

(*Z*)-*N*-(2-((3-(4-fluorophenyl)-3-oxo-1-phenylprop-1-en-1-yl)amino)phenyl)acetamide  
**(1i)**

318 mg, 85 % yield; Yellow solid; mp: 154-156 °C;  $^1\text{H}$  NMR (400 MHz,  $\text{CDCl}_3$ )  $\delta$  12.60 (s, 1H), 8.15 (s, 1H), 8.00 – 7.90 (m, 2H), 7.85 (d,  $J = 8.0$  Hz, 1H), 7.37 – 7.21 (m, 5H), 7.07 (t,  $J = 8.6$  Hz, 2H), 7.01 (t,  $J = 7.7$  Hz, 1H), 6.77 (t,  $J = 7.5$  Hz, 1H), 6.50 (d,  $J = 7.9$  Hz, 1H), 6.11 (s, 1H), 2.26 (s, 3H);  $^{13}\text{C}$  NMR (101 MHz,  $\text{CDCl}_3$ )  $\delta$  188.5, 169.1, 164.8 (d,  $J = 252.2$  Hz), 162.9, 135.8 (d,  $J = 2.8$  Hz), 135.1, 131.5, 131.3, 129.9, 129.6 (d,  $J = 8.9$  Hz), 128.4, 127.9, 125.9, 125.6, 124.6, 123.6, 115.3 (d,  $J = 21.7$  Hz), 97.2, 24.2;  $^{19}\text{F}$  NMR (376 MHz,  $\text{CDCl}_3$ )  $\delta$  -108.1; HRMS  $m/z$  (ESI) calcd for  $\text{C}_{23}\text{H}_{20}\text{FN}_2\text{O}_2$  ( $\text{M} + \text{H}$ ) $^+$  375.1503, found 375.1503.

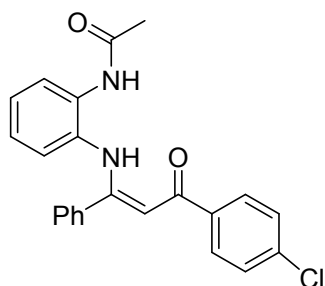

(*Z*)-*N*-(2-((3-(4-chlorophenyl)-3-oxo-1-phenylprop-1-en-1-yl)amino)phenyl)acetamide  
**(1j)**



311 mg, 80 % yield; Yellow solid; mp: 186-187 °C; <sup>1</sup>H NMR (400 MHz, CDCl<sub>3</sub>) δ 12.64 (s, 1H), 8.01 (s, 1H), 7.88 (t, *J* = 8.2 Hz, 3H), 7.42 – 7.23 (m, 7H), 7.03 (t, *J* = 7.4 Hz, 1H), 6.78 (t, *J* = 7.5 Hz, 1H), 6.52 (d, *J* = 7.9 Hz, 1H), 6.11 (s, 1H), 2.27 (s, 3H); <sup>13</sup>C NMR (100 MHz, CDCl<sub>3</sub>) δ 188.6, 169.0, 163.2, 137.9, 137.7, 135.0, 131.6, 131.0, 130.0, 128.7, 128.6, 128.5, 127.9, 126.0, 125.8, 124.6, 123.5, 97.2, 24.3. HRMS *m/z* (ESI) calcd for C<sub>23</sub>H<sub>20</sub>ClN<sub>2</sub>O<sub>2</sub> (M + H)<sup>+</sup> 391.1208, found 391.1208.

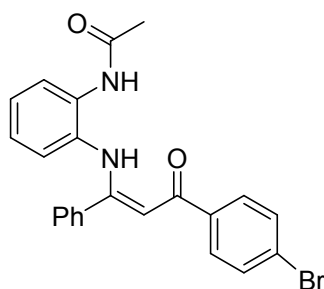

(*Z*)-*N*-(2-((3-(4-bromophenyl)-3-oxo-1-phenylprop-1-en-1-yl)amino)phenyl)acetamide (**1k**)

326 mg, 75 % yield; Yellow solid; mp: 199-201 °C; <sup>1</sup>H NMR (400 MHz, DMSO-*d*<sub>6</sub>) δ 12.45 (s, 1H), 9.88 (s, 1H), 7.97 (d, *J* = 8.4 Hz, 2H), 7.69 (d, *J* = 8.4 Hz, 2H), 7.49 (d, *J* = 6.9 Hz, 2H), 7.44 – 7.33 (m, 4H), 7.02 (t, *J* = 7.6 Hz, 1H), 6.84 (t, *J* = 7.6 Hz, 1H), 6.44 (d, *J* = 8.0 Hz, 1H), 6.20 (s, 1H), 2.14 (s, 3H); <sup>13</sup>C NMR (100 MHz, DMSO-*d*<sub>6</sub>) δ 187.4, 169.4, 162.2, 138.7, 135.9, 134.6, 132.0, 131.8, 130.3, 129.8, 128.9, 128.7, 126.5, 125.8, 125.8, 125.7, 125.2, 97.1, 23.6. HRMS *m/z* (ESI) calcd for C<sub>23</sub>H<sub>20</sub>BrN<sub>2</sub>O<sub>2</sub> (M + H)<sup>+</sup> 435.0703, found 435.0705.

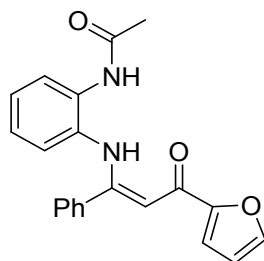

(*Z*)-*N*-(2-((3-(furan-2-yl)-3-oxo-1-phenylprop-1-en-1-yl)amino)phenyl)acetamide (**1l**)

252 mg, 73 % yield; Yellow solid; mp: 208-210 °C; <sup>1</sup>H NMR (400 MHz, DMSO-*d*<sub>6</sub>)

$\delta$  12.08 (s, 1H), 9.89 (s, 1H), 7.90 (s, 1H), 7.46 (d,  $J = 6.6$  Hz, 2H), 7.42 – 7.30 (m, 5H), 7.00 (t,  $J = 7.4$  Hz, 1H), 6.83 (t,  $J = 7.5$  Hz, 1H), 6.67 (dd,  $J = 3.3, 1.6$  Hz, 1H), 6.43 (d,  $J = 7.9$  Hz, 1H), 6.06 (s, 1H), 2.15 (s, 3H);  $^{13}\text{C}$  NMR (100 MHz, DMSO- $d_6$ )  $\delta$  174.6, 165.9, 157.8, 150.5, 143.0, 132.4, 131.3, 128.2, 126.8, 125.5, 125.0, 123.0, 122.2, 122.2, 121.5, 111.6, 109.3, 93.8, 20.1. HRMS  $m/z$  (ESI) calcd for  $\text{C}_{21}\text{H}_{19}\text{N}_2\text{O}_3$  ( $\text{M} + \text{H}$ ) $^+$  347.1390, found 347.1390.

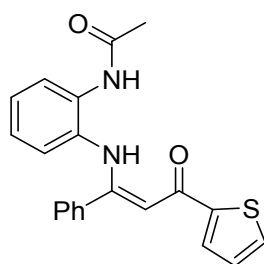

(*Z*)-*N*-(2-((3-oxo-1-phenyl-3-(thiophen-2-yl)prop-1-en-1-yl)amino)phenyl)acetamide  
**(1m)**

250 mg, 69 % yield; Yellow solid; mp: 196-198 °C;  $^1\text{H}$  NMR (400 MHz,  $\text{CDCl}_3$ )  $\delta$  12.25 (s, 1H), 8.06 – 7.81 (m, 2H), 7.67 (d,  $J = 3.4$  Hz, 1H), 7.54 (d,  $J = 4.8$  Hz, 1H), 7.40 – 7.21 (m, 5H), 7.13 – 7.08 (m, 1H), 7.03 (t,  $J = 7.7$  Hz, 1H), 6.77 (t,  $J = 7.5$  Hz, 1H), 6.52 (d,  $J = 7.8$  Hz, 1H), 6.07 (s, 1H), 2.27 (s, 3H);  $^{13}\text{C}$  NMR (100 MHz,  $\text{CDCl}_3$ )  $\delta$  182.9, 169.0, 162.5, 146.3, 135.1, 131.7, 131.4, 131.1, 130.0, 129.0, 128.5, 128.0, 128.0, 126.0, 125.7, 124.5, 123.2, 97.6, 24.4. HRMS  $m/z$  (ESI) calcd for  $\text{C}_{21}\text{H}_{19}\text{N}_2\text{O}_2\text{S}$  ( $\text{M} + \text{H}$ ) $^+$  363.1162, found 363.1162.

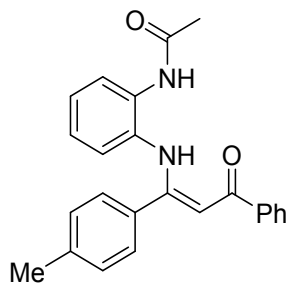

(*Z*)-*N*-(2-((3-oxo-3-phenyl-1-(*p*-tolyl)prop-1-en-1-yl)amino)phenyl)acetamide (**1n**)

311 mg, 84 % yield; Yellow solid; mp: 174-175 °C;  $^1\text{H}$  NMR (400 MHz,  $\text{CDCl}_3$ )  $\delta$

12.64 (s, 1H), 8.04 (s, 1H), 8.00 – 7.89 (m, 3H), 7.51 – 7.36 (m, 3H), 7.19 (d,  $J = 8.1$  Hz, 2H), 7.10 – 6.98 (m, 3H), 6.79 (t,  $J = 7.5$  Hz, 1H), 6.56 (d,  $J = 7.9$  Hz, 1H), 6.18 (s, 1H), 2.31 (s, 3H), 2.26 (s, 3H);  $^{13}\text{C}$  NMR (100 MHz,  $\text{CDCl}_3$ )  $\delta$  190.0, 169.0, 163.1, 140.2, 139.6, 132.3, 131.8, 131.4, 131.1, 129.2, 128.4, 127.9, 127.2, 126.0, 125.6, 124.4, 123.1, 97.5, 24.4, 21.3. HRMS  $m/z$  (ESI) calcd for  $\text{C}_{24}\text{H}_{23}\text{N}_2\text{O}_2$  ( $\text{M} + \text{H}$ )<sup>+</sup> 371.1754, found 371.1754.

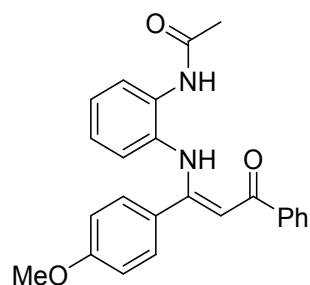

(*Z*)-*N*-(2-((1-(4-methoxyphenyl)-3-oxo-3-phenylprop-1-en-1-yl)amino)phenyl)-acetamide (**1o**)

294 mg, 76 % yield; Yellow solid; mp: 211-212 °C;  $^1\text{H}$  NMR (400 MHz,  $\text{DMSO-d}_6$ )  $\delta$  12.43 (s, 1H), 9.86 (s, 1H), 8.06 – 7.96 (m, 2H), 7.58 – 7.42 (m, 5H), 7.38 (d,  $J = 7.5$  Hz, 1H), 7.05 – 6.98 (m, 1H), 6.96 – 6.83 (m, 3H), 6.47 (d,  $J = 7.8$  Hz, 1H), 6.20 (s, 1H), 3.76 (s, 3H), 2.14 (s, 3H);  $^{13}\text{C}$  NMR (100 MHz,  $\text{DMSO-d}_6$ )  $\delta$  185.0, 165.9, 158.0, 157.4, 136.4, 131.5, 128.4, 128.2, 126.9, 125.4, 124.5, 124.1, 123.0, 122.3, 122.2, 121.4, 110.9, 93.6, 52.2, 20.2. HRMS  $m/z$  (ESI) calcd for  $\text{C}_{24}\text{H}_{23}\text{N}_2\text{O}_3$  ( $\text{M} + \text{H}$ )<sup>+</sup> 387.1703, found 387.1702.

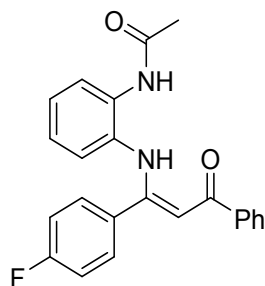

(*Z*)-*N*-(2-((1-(4-fluorophenyl)-3-oxo-3-phenylprop-1-en-1-yl)amino)phenyl)-acetamide (**1p**)

307 mg, 82 % yield; Yellow solid; mp: 186-188 °C; <sup>1</sup>H NMR (400 MHz, CDCl<sub>3</sub>) δ 12.60 (s, 1H), 8.38 (s, 1H), 7.92 (d, *J* = 7.2 Hz, 2H), 7.83 (d, *J* = 7.9 Hz, 1H), 7.44 (dt, *J* = 27.2, 7.2 Hz, 3H), 7.26 (dd, *J* = 8.6, 5.3 Hz, 2H), 7.02 (t, *J* = 7.6 Hz, 1H), 6.91 (t, *J* = 8.6 Hz, 2H), 6.78 (t, *J* = 7.4 Hz, 1H), 6.45 (d, *J* = 7.8 Hz, 1H), 6.12 (s, 1H), 2.26 (s, 3H); <sup>13</sup>C NMR (100 MHz, CDCl<sub>3</sub>) δ 190.1, 169.2, 163.3 (d, *J* = 250.9 Hz), 161.5, 139.5, 131.6, 131.5, 131.4, 131.2 (d, *J* = 3.2 Hz), 130.1 (d, *J* = 8.5 Hz), 128.4, 127.2, 125.8, 125.6, 124.7, 123.8, 115.5 (d, *J* = 21.8 Hz), 97.6, 24.1; <sup>19</sup>F NMR (376 MHz, CDCl<sub>3</sub>) δ -109.8; HRMS *m/z* (ESI) calcd for C<sub>23</sub>H<sub>20</sub>FN<sub>2</sub>O<sub>2</sub> (M + H)<sup>+</sup> 375.1503, found 375.1503.

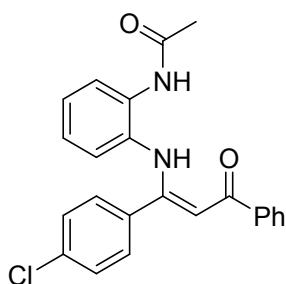

(*Z*)-*N*-(2-((1-(4-chlorophenyl)-3-oxo-3-phenylprop-1-en-1-yl)amino)phenyl)-acetamide (**1q**)

326 mg, 84 % yield; Yellow solid; mp: 185-187 °C; <sup>1</sup>H NMR (400 MHz, CDCl<sub>3</sub>) δ 12.57 (s, 1H), 8.28 (s, 1H), 7.92 (d, *J* = 7.5 Hz, 2H), 7.83 (d, *J* = 8.0 Hz, 1H), 7.48 (t, *J* = 7.2 Hz, 1H), 7.41 (t, *J* = 7.4 Hz, 2H), 7.31 – 7.14 (m, 4H), 7.03 (t, *J* = 7.7 Hz, 1H), 6.79 (t, *J* = 7.6 Hz, 1H), 6.46 (d, *J* = 7.9 Hz, 1H), 6.13 (s, 1H), 2.26 (s, 3H); <sup>13</sup>C NMR (100 MHz, CDCl<sub>3</sub>) δ 190.2, 169.2, 161.2, 139.4, 135.9, 133.6, 131.6, 131.5, 131.4, 129.4, 128.7, 128.4, 127.2, 125.8, 125.6, 124.8, 123.8, 97.7, 24.2. HRMS *m/z* (ESI) calcd for C<sub>23</sub>H<sub>20</sub>ClN<sub>2</sub>O<sub>2</sub> (M + H)<sup>+</sup> 391.1208, found 391.1207.

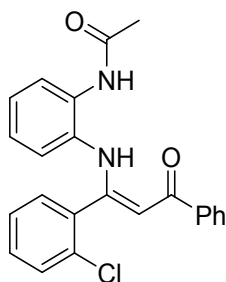

(*Z*)-*N*-(2-((1-(2-chlorophenyl)-3-oxo-3-phenylprop-1-en-1-yl)amino)phenyl)-acetamide (**1r**)

300 mg, 77 % yield; Yellow solid; mp: 226-228 °C; <sup>1</sup>H NMR (400 MHz, DMSO-*d*<sub>6</sub>) δ 12.64 (s, 1H), 9.83 (s, 1H), 8.04 – 7.90 (m, 2H), 7.61 – 7.33 (m, 7H), 7.32 – 7.21 (m, 1H), 7.01 (t, *J* = 7.1 Hz, 1H), 6.85 (t, *J* = 7.4 Hz, 1H), 6.45 (d, *J* = 7.6 Hz, 1H), 6.06 (s, 1H), 2.16 (s, 3H); <sup>13</sup>C NMR (100 MHz, DMSO-*d*<sub>6</sub>) δ 185.1, 166.1, 155.0, 136.0, 131.6, 131.3, 128.6, 128.4, 128.0, 127.8, 127.7, 126.7, 125.5, 124.4, 124.1, 123.7, 122.6, 121.8, 120.1, 93.9, 20.0. HRMS *m/z* (ESI) calcd for C<sub>23</sub>H<sub>20</sub>ClN<sub>2</sub>O<sub>2</sub> (M + H)<sup>+</sup> 391.1208, found 391.1208.

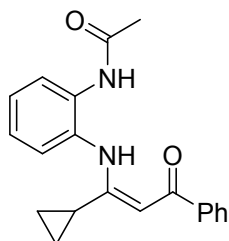

(*Z*)-*N*-(2-((1-cyclopropyl-3-oxo-3-phenylprop-1-en-1-yl)amino)phenyl)acetamide (**1s**)  
 205 mg, 64 % yield; Yellow solid; mp: 157-158 °C; <sup>1</sup>H NMR (400 MHz, DMSO-*d*<sub>6</sub>) δ 13.04 (s, 1H), 9.67 (s, 1H), 7.93 (d, *J* = 6.7 Hz, 2H), 7.52 – 7.40 (m, 5H), 7.31 – 7.19 (m, 2H), 5.69 (s, 1H), 2.06 (s, 3H), 1.72 – 1.51 (m, 1H), 1.11 – 0.76 (m, 4H); <sup>13</sup>C NMR (100 MHz, DMSO-*d*<sub>6</sub>) δ 184.2, 165.8, 164.8, 136.8, 130.0, 129.5, 127.8, 125.2, 123.9, 123.4, 123.1, 122.9, 122.7, 84.1, 20.1, 10.1, 6.7. HRMS *m/z* (ESI) calcd for C<sub>20</sub>H<sub>21</sub>N<sub>2</sub>O<sub>2</sub> (M + H)<sup>+</sup> 321.1598, found 321.1598.

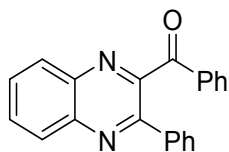

**phenyl(3-phenylquinoxalin-2-yl)methanone (2a)**

55.9 mg, 90 % yield; White solid; mp: 154-155 °C; <sup>1</sup>H NMR (400 MHz, CDCl<sub>3</sub>) δ 8.24 (dd, *J* = 8.3, 0.8 Hz, 1H), 8.16 (dd, *J* = 8.3, 0.8 Hz, 1H), 7.95 (d, *J* = 7.6 Hz, 2H), 7.84 (dt, *J* = 23.2, 7.2 Hz, 2H), 7.70 (dd, *J* = 4.0, 3.1 Hz, 2H), 7.60 (t, *J* = 7.4 Hz, 1H), 7.46 (t, *J* = 7.7 Hz, 2H), 7.42 – 7.34 (m, 3H); <sup>13</sup>C NMR (100 MHz, CDCl<sub>3</sub>) δ 193.9, 152.7, 151.2, 142.1, 139.6, 137.2, 135.5, 134.0, 131.4, 130.5, 130.4, 129.6, 129.4, 129.4, 129.0, 128.6, 128.6. HRMS *m/z* (ESI) calcd for C<sub>21</sub>H<sub>15</sub>N<sub>2</sub>O (M + H)<sup>+</sup> 311.1179, found 311.1177.

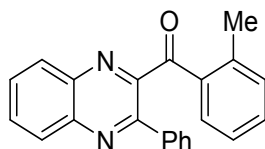

**(3-phenylquinoxalin-2-yl)(*o*-tolyl)methanone (2b)**

44.7 mg, 69 % yield; Pale yellow solid; mp: 170-172 °C; <sup>1</sup>H NMR (400 MHz, CDCl<sub>3</sub>) δ 8.23 (d, *J* = 8.3 Hz, 1H), 8.16 (d, *J* = 8.2 Hz, 1H), 7.84 (dt, *J* = 15.0, 7.1 Hz, 2H), 7.74 – 7.65 (m, 2H), 7.50 (d, *J* = 7.7 Hz, 1H), 7.46 – 7.35 (m, 4H), 7.31 – 7.25 (m, 1H), 7.18 (t, *J* = 7.6 Hz, 1H), 2.60 (s, 3H); <sup>13</sup>C NMR (100 MHz, CDCl<sub>3</sub>) δ 196.0, 152.8, 152.4, 142.0, 141.3, 139.8, 137.5, 134.8, 132.8, 132.8, 132.3, 131.3, 130.4, 129.5, 129.5, 129.4, 129.0, 128.6, 125.5, 21.8. HRMS *m/z* (ESI) calcd for C<sub>22</sub>H<sub>17</sub>N<sub>2</sub>O (M + H)<sup>+</sup> 325.1335, found 325.1335.

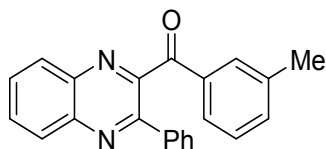

**(3-phenylquinoxalin-2-yl)(*m*-tolyl)methanone (2c)**

43.6 mg, 67 % yield; White solid; mp: 132-134 °C; <sup>1</sup>H NMR (400 MHz, CDCl<sub>3</sub>) δ

8.27 (dd,  $J = 8.3, 1.0$  Hz, 1H), 8.20 (dd,  $J = 8.2, 1.1$  Hz, 1H), 7.92 – 7.80 (m, 3H), 7.80 – 7.71 (m, 3H), 7.50 – 7.33 (m, 5H), 2.41 (s, 1H);  $^{13}\text{C}$  NMR (100 MHz,  $\text{CDCl}_3$ )  $\delta$  194.1, 152.7, 151.4, 142.0, 139.6, 138.5, 137.2, 135.5, 134.9, 131.3, 130.7, 130.3, 129.5, 129.4, 129.4, 129.0, 128.6, 128.5, 127.9, 21.2. HRMS  $m/z$  (ESI) calcd for  $\text{C}_{22}\text{H}_{17}\text{N}_2\text{O}$  ( $\text{M} + \text{H}$ ) $^+$  325.1335, found 325.1338.

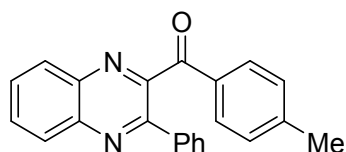

(3-phenylquinoxalin-2-yl)(*p*-tolyl)methanone (**2d**)

53.9 mg, 83 % yield; White solid; mp: 137-138 °C;  $^1\text{H}$  NMR (400 MHz,  $\text{CDCl}_3$ )  $\delta$  8.23 (dd,  $J = 8.3, 1.1$  Hz, 1H), 8.15 (dd,  $J = 8.3, 1.1$  Hz, 1H), 7.89 – 7.77 (m, 4H), 7.75 – 7.67 (m, 2H), 7.42 – 7.34 (m, 3H), 7.26 (d,  $J = 7.9$  Hz, 2H), 2.41 (s, 1H);  $^{13}\text{C}$  NMR (100 MHz,  $\text{CDCl}_3$ )  $\delta$  193.6, 152.7, 151.5, 145.2, 142.0, 139.6, 137.3, 133.1, 131.2, 130.6, 130.3, 129.5, 129.4, 129.4, 129.4, 129.0, 128.6, 21.8. HRMS  $m/z$  (ESI) calcd for  $\text{C}_{22}\text{H}_{17}\text{N}_2\text{O}$  ( $\text{M} + \text{H}$ ) $^+$  325.1335, found 325.1334.

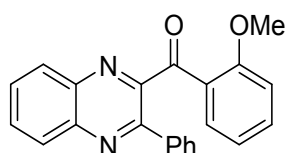

(2-methoxyphenyl)(3-phenylquinoxalin-2-yl)methanone (**2e**)

60.0 mg, 88 % yield; White solid; mp: 145-147 °C;  $^1\text{H}$  NMR (400 MHz,  $\text{CDCl}_3$ )  $\delta$  8.20 (dd,  $J = 8.3, 0.8$  Hz, 1H), 8.10 (dd,  $J = 8.2, 0.9$  Hz, 1H), 7.96 (dd,  $J = 7.7, 1.6$  Hz, 1H), 7.88 – 7.69 (m, 4H), 7.57 – 7.47 (m, 1H), 7.43 – 7.33 (m, 3H), 7.08 (t,  $J = 7.5$  Hz, 1H), 6.86 (d,  $J = 8.4$  Hz, 1H), 3.42 (s, 3H);  $^{13}\text{C}$  NMR (100 MHz,  $\text{CDCl}_3$ )  $\delta$  193.9, 159.4, 153.9, 152.0, 141.8, 139.7, 137.6, 135.4, 131.6, 130.6, 129.9, 129.3, 129.3, 129.3, 129.3, 128.5, 126.0, 121.1, 112.0, 55.6. HRMS  $m/z$  (ESI) calcd for  $\text{C}_{22}\text{H}_{17}\text{N}_2\text{O}_2$  ( $\text{M} + \text{H}$ ) $^+$  341.1285, found 341.1285.

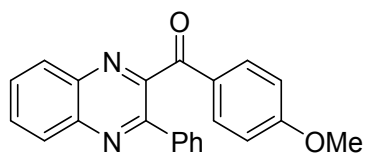

(4-methoxyphenyl)(3-phenylquinoxalin-2-yl)methanone (**2f**)

63.0 mg, 93 % yield; White solid; mp: 132-133 °C; <sup>1</sup>H NMR (400 MHz, CDCl<sub>3</sub>) δ 8.22 (d, *J* = 8.1 Hz, 1H), 8.15 (d, *J* = 8.2 Hz, 1H), 7.92 (d, *J* = 8.7 Hz, 2H), 7.88 – 7.76 (m, 2H), 7.72 (dd, *J* = 6.2, 2.4 Hz, 2H), 7.44 – 7.33 (m, 3H), 6.93 (d, *J* = 8.8 Hz, 2H), 3.85 (s, 3H); <sup>13</sup>C NMR (100 MHz, CDCl<sub>3</sub>) δ 192.5, 164.3, 152.7, 151.6, 142.0, 139.6, 137.3, 132.9, 131.2, 130.3, 129.5, 129.4, 129.3, 129.0, 128.6, 128.6, 114.0, 55.5. HRMS *m/z* (ESI) calcd for C<sub>22</sub>H<sub>17</sub>N<sub>2</sub>O<sub>2</sub> (M + H)<sup>+</sup> 341.1285, found 341.1286.

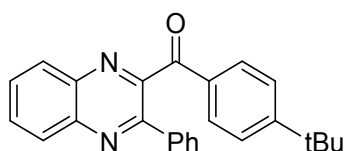

(4-(tert-butyl)phenyl)(3-phenylquinoxalin-2-yl)methanone (**2g**)

45.9 mg, 63 % yield; White solid; mp: 151-152 °C; <sup>1</sup>H NMR (400 MHz, CDCl<sub>3</sub>) δ 8.23 (dd, *J* = 8.3, 0.9 Hz, 1H), 8.16 (dd, *J* = 8.2, 1.0 Hz, 1H), 7.95 – 7.77 (m, 4H), 7.76 – 7.69 (m, 2H), 7.50 (d, *J* = 8.5 Hz, 2H), 7.45 – 7.33 (m, 3H), 1.35 (s, 9H); <sup>13</sup>C NMR (100 MHz, CDCl<sub>3</sub>) δ 193.5, 158.0, 152.9, 151.4, 142.0, 139.5, 137.3, 133.0, 131.3, 130.6, 130.3, 129.5, 129.4, 129.4, 129.1, 128.6, 125.7, 35.3, 31.0, 31.0, 31.0. HRMS *m/z* (ESI) calcd for C<sub>25</sub>H<sub>23</sub>N<sub>2</sub>O (M + H)<sup>+</sup> 367.1805, found 367.1804.

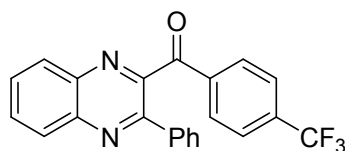

(3-phenylquinoxalin-2-yl)(4-(trifluoromethyl)phenyl)methanone (**2h**)

44.1 mg, 58 % yield; White solid; mp: 148-149 °C; <sup>1</sup>H NMR (400 MHz, CDCl<sub>3</sub>) δ 8.25 (d, *J* = 7.9 Hz, 1H), 8.18 – 8.14 (m, 1H), 8.09 (d, *J* = 8.2 Hz, 2H), 7.94 – 7.81 (m, 2H), 7.75 (d, *J* = 8.3 Hz, 2H), 7.67 (dd, *J* = 6.5, 3.0 Hz, 2H), 7.47 – 7.36 (m, 3H); <sup>13</sup>C



NMR (100 MHz, CDCl<sub>3</sub>)  $\delta$  192.8, 153.0, 150.2, 142.3, 139.5, 138.3, 137.1, 135.1 (q,  $J = 32.7$  Hz), 131.8, 130.8, 130.7, 129.8, 129.5, 129.5, 129.1, 128.8, 125.7 (q,  $J = 3.7$  Hz), 123.5 (q,  $J = 272.9$  Hz); <sup>19</sup>F NMR (376 MHz, CDCl<sub>3</sub>)  $\delta$  -63.2; HRMS m/z (ESI) calcd for C<sub>22</sub>H<sub>14</sub>F<sub>3</sub>N<sub>2</sub>O (M + H)<sup>+</sup> 379.1053, found 379.1052.

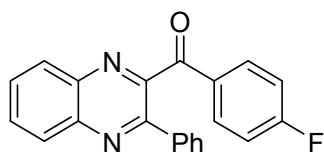

(4-fluorophenyl)(3-phenylquinoxalin-2-yl)methanone (**2i**)

43.9 mg, 67 % yield; White solid; mp: 165-166 °C; <sup>1</sup>H NMR (400 MHz, CDCl<sub>3</sub>)  $\delta$  8.24 (dd,  $J = 8.5, 0.9$  Hz, 1H), 8.16 (dd,  $J = 8.3, 1.3$  Hz, 1H), 8.04 – 7.95 (m, 2H), 7.85 (dtd,  $J = 15.1, 7.1, 1.3$  Hz, 2H), 7.72 – 7.64 (m, 2H), 7.44 – 7.35 (m, 3H), 7.18 – 7.09 (m, 2H); <sup>13</sup>C NMR (100 MHz, CDCl<sub>3</sub>)  $\delta$  192.3, 166.3 (d,  $J = 257.1$  Hz), 152.8, 150.8, 142.1, 139.5, 137.2, 133.2 (d,  $J = 9.6$  Hz), 132.0 (d,  $J = 2.8$  Hz), 131.5, 130.5, 129.6, 129.5, 129.4, 129.0, 128.7, 116.0 (d,  $J = 22.1$  Hz); <sup>19</sup>F NMR (376 MHz, CDCl<sub>3</sub>)  $\delta$  -102.9; HRMS m/z (ESI) calcd for C<sub>21</sub>H<sub>14</sub>FN<sub>2</sub>O (M + H)<sup>+</sup> 329.1085, found 329.1079.

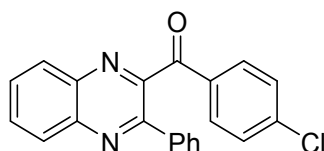

(4-chlorophenyl)(3-phenylquinoxalin-2-yl)methanone (**2j**)

50.1 mg, 73 % yield; White solid; mp: 161-163 °C; <sup>1</sup>H NMR (400 MHz, DMSO-d<sub>6</sub>)  $\delta$  8.27 (d,  $J = 8.0$  Hz, 1H), 8.18 (d,  $J = 8.0$  Hz, 1H), 8.07 – 8.00 (m, 3H), 7.99 – 7.93 (m, 1H), 7.69 – 7.60 (m, 4H), 7.50 – 7.41 (m, 3H); <sup>13</sup>C NMR (100 MHz, DMSO-d<sub>6</sub>)  $\delta$  189.6, 149.2, 147.6, 138.5, 136.6, 135.8, 133.9, 130.9, 129.2, 129.1, 128.1, 126.6, 126.2, 126.1, 126.1, 125.9, 125.6. HRMS m/z (ESI) calcd for C<sub>21</sub>H<sub>14</sub>ClN<sub>2</sub>O (M + H)<sup>+</sup> 345.0789, found 345.0786.

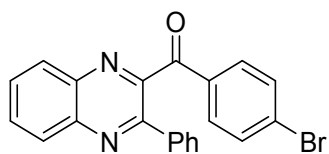

(4-bromophenyl)(3-phenylquinoxalin-2-yl)methanone (**2k**)

41.0 mg, 53 % yield; White solid; mp:167-168 °C;  $^1\text{H}$  NMR (400 MHz,  $\text{CDCl}_3$ )  $\delta$  8.24 (d,  $J = 8.3$  Hz, 1H), 8.16 (d,  $J = 8.2$  Hz, 1H), 7.93 – 7.79 (m, 4H), 7.73 – 7.57 (m, 4H), 7.40 (d,  $J = 4.9$  Hz, 3H);  $^{13}\text{C}$  NMR (100 MHz,  $\text{CDCl}_3$ )  $\delta$  192.9, 152.8, 150.6, 142.2, 139.6, 137.1, 134.4, 132.1, 131.9, 131.6, 130.6, 129.7, 129.6, 129.5, 129.4, 129.1, 128.8. HRMS  $m/z$  (ESI) calcd for  $\text{C}_{21}\text{H}_{14}\text{BrN}_2\text{O}$  ( $\text{M} + \text{H}$ ) $^+$  389.0284, found 389.0284.

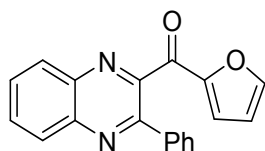

furan-2-yl(3-phenylquinoxalin-2-yl)methanone (**2l**)

25.1 mg, 42 % yield; Brown solid; mp: 153-154 °C;  $^1\text{H}$  NMR (400 MHz,  $\text{CDCl}_3$ )  $\delta$  8.21 (dd,  $J = 15.3, 8.0$  Hz, 2H), 7.93 – 7.80 (m, 2H), 7.72 (dd,  $J = 6.5, 2.8$  Hz, 2H), 7.67 (s, 1H), 7.49 – 7.39 (m, 3H), 7.30 (d,  $J = 3.5$  Hz, 1H), 6.58 (dd,  $J = 3.4, 1.4$  Hz, 1H);  $^{13}\text{C}$  NMR (100 MHz,  $\text{CDCl}_3$ )  $\delta$  181.2, 152.8, 151.7, 149.8, 148.3, 142.3, 139.7, 137.2, 131.7, 130.5, 129.6, 129.5, 129.4, 129.0, 128.7, 122.4, 112.8. HRMS  $m/z$  (ESI) calcd for  $\text{C}_{19}\text{H}_{13}\text{N}_2\text{O}_2$  ( $\text{M} + \text{H}$ ) $^+$  301.0972, found 301.0968.

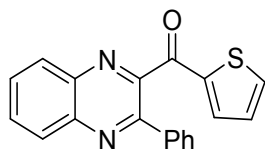

(3-phenylquinoxalin-2-yl)(thiophen-2-yl)methanone (**2m**)

27.0 mg, 43 % yield; White solid; mp: 137-139 °C;  $^1\text{H}$  NMR (400 MHz,  $\text{CDCl}_3$ )  $\delta$  8.21 (dd,  $J = 13.6, 8.2$  Hz, 2H), 7.92 – 7.76 (m, 4H), 7.73 (dd,  $J = 6.2, 2.7$  Hz, 2H), 7.48 – 7.39 (m, 3H), 7.17 (t,  $J = 4.3$  Hz, 1H);  $^{13}\text{C}$  NMR (100 MHz,  $\text{CDCl}_3$ )  $\delta$  185.8,

152.8, 150.2, 142.5, 142.3, 139.4, 137.4, 136.4, 136.2, 131.6, 130.5, 129.6, 129.4, 129.4, 129.0, 128.7, 128.5. HRMS  $m/z$  (ESI) calcd for  $C_{19}H_{13}N_2OS$  ( $M + H$ )<sup>+</sup> 317.0743, found 317.0743.

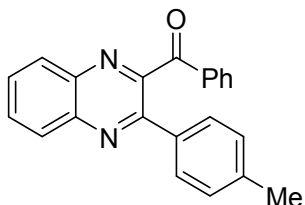

phenyl(3-(*p*-tolyl)quinoxalin-2-yl)methanone (**2n**)

28.6 mg, 44 % yield; White solid; mp: 186-188 °C; <sup>1</sup>H NMR (400 MHz, CDCl<sub>3</sub>) δ 8.22 (d,  $J = 8.4$  Hz, 1H), 8.14 (d,  $J = 8.3$  Hz, 1H), 8.00 – 7.91 (m, 2H), 7.82 (dtd,  $J = 16.5, 7.0, 1.3$  Hz, 2H), 7.65 – 7.56 (m, 3H), 7.46 (t,  $J = 7.7$  Hz, 2H), 7.18 (d,  $J = 8.0$  Hz, 2H), 2.34 (s, 3H); <sup>13</sup>C NMR (100 MHz, CDCl<sub>3</sub>) δ 194.1, 152.7, 151.2, 142.1, 139.7, 139.5, 135.6, 134.4, 134.0, 131.3, 130.5, 130.2, 129.4, 129.4, 129.4, 129.0, 128.7, 21.3. HRMS  $m/z$  (ESI) calcd for  $C_{22}H_{17}N_2O$  ( $M + H$ )<sup>+</sup> 325.1335, found 325.1333.

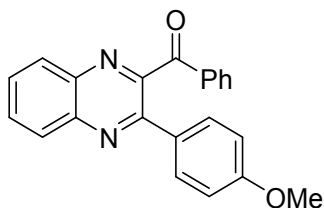

(3-(4-methoxyphenyl)quinoxalin-2-yl)(phenyl)methanone (**2o**)

41.5 mg, 61 % yield; Pale yellow solid; mp: 144-145 °C; <sup>1</sup>H NMR (400 MHz, CDCl<sub>3</sub>) δ 8.21 (d,  $J = 8.4$  Hz, 1H), 8.14 (d,  $J = 8.2$  Hz, 1H), 7.95 (d,  $J = 7.3$  Hz, 2H), 7.89 – 7.84 (m, 1H), 7.82 – 7.76 (m, 1H), 7.71 – 7.65 (m, 2H), 7.62 (t,  $J = 7.4$  Hz, 1H), 7.48 (t,  $J = 7.7$  Hz, 2H), 6.95 – 6.87 (m, 2H), 3.80 (s, 3H); <sup>13</sup>C NMR (100 MHz, CDCl<sub>3</sub>) δ 194.3, 160.9, 152.2, 151.2, 142.2, 139.4, 135.6, 134.1, 131.3, 130.6, 130.5, 130.1, 129.6, 129.4, 129.3, 128.7, 114.3, 55.3. HRMS  $m/z$  (ESI) calcd for  $C_{22}H_{17}N_2O_2$  ( $M +$

H)<sup>+</sup> 341.1285, found 341.1286.

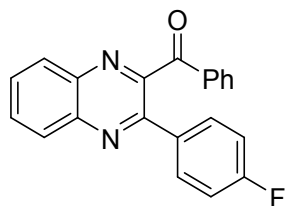

(3-(4-fluorophenyl)quinoxalin-2-yl)(phenyl)methanone (**2p**)

46.2 mg, 70 % yield; White solid; mp: 97-98 °C; <sup>1</sup>H NMR (400 MHz, CDCl<sub>3</sub>) δ 8.22 (d, *J* = 8.3 Hz, 1H), 8.16 (d, *J* = 8.2 Hz, 1H), 7.94 (d, *J* = 7.8 Hz, 2H), 7.85 (dt, *J* = 15.1, 7.1 Hz, 2H), 7.70 (dd, *J* = 8.4, 5.4 Hz, 2H), 7.63 (t, *J* = 7.4 Hz, 1H), 7.48 (t, *J* = 7.7 Hz, 2H), 7.08 (t, *J* = 8.6 Hz, 2H); <sup>13</sup>C NMR (100 MHz, CDCl<sub>3</sub>) δ 193.9, 163.6 (d, *J* = 250.3 Hz), 151.6, 151.0, 142.0, 139.6, 135.4, 134.2, 133.4 (d, *J* = 3.3 Hz), 131.5, 131.1 (d, *J* = 8.6 Hz), 130.6, 130.5, 129.4, 129.4, 128.8, 115.9 (d, *J* = 21.9 Hz); <sup>19</sup>F NMR (376 MHz, CDCl<sub>3</sub>) δ -111.1; HRMS *m/z* (ESI) calcd for C<sub>21</sub>H<sub>14</sub>FN<sub>2</sub>O (M + H)<sup>+</sup> 329.1085, found 329.1085.

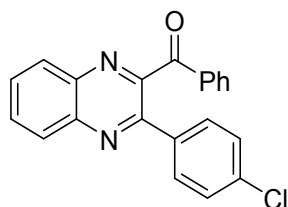

(3-(4-chlorophenyl)quinoxalin-2-yl)(phenyl)methanone (**2q**)

48.7 mg, 71 % yield; White solid; mp: 170-172 °C; <sup>1</sup>H NMR (400 MHz, CDCl<sub>3</sub>) δ 8.21 (d, *J* = 8.2 Hz, 1H), 8.15 (dd, *J* = 8.2, 1.0 Hz, 1H), 7.99 – 7.92 (m, 2H), 7.90 – 7.79 (m, 2H), 7.69 – 7.59 (m, 3H), 7.48 (t, *J* = 7.7 Hz, 2H), 7.36 (d, *J* = 8.5 Hz, 2H); <sup>13</sup>C NMR (100 MHz, CDCl<sub>3</sub>) δ 193.8, 151.5, 150.9, 142.0, 139.6, 135.9, 135.7, 135.4, 134.2, 131.6, 130.6, 130.5, 130.4, 129.4, 129.4, 128.9, 128.8. HRMS *m/z* (ESI) calcd for C<sub>21</sub>H<sub>14</sub>ClN<sub>2</sub>O (M + H)<sup>+</sup> 345.0789, found 345.0791.

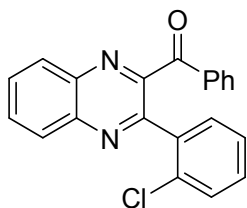

(3-(2-chlorophenyl)quinoxalin-2-yl)(phenyl)methanone (**2r**)

42.8 mg, 62 % yield; White solid; mp: 128-129 °C; <sup>1</sup>H NMR (400 MHz, CDCl<sub>3</sub>) δ 8.22 (dd, *J* = 16.9, 8.1 Hz, 2H), 8.04 (d, *J* = 7.7 Hz, 2H), 7.94 – 7.80 (m, 2H), 7.69 – 7.56 (m, 2H), 7.55 – 7.29 (m, 5H); <sup>13</sup>C NMR (100 MHz, CDCl<sub>3</sub>) δ 192.3, 152.2, 150.4, 141.8, 139.6, 136.9, 135.0, 133.6, 132.1, 131.7, 131.4, 131.0, 130.8, 130.4, 129.7, 129.4, 129.4, 128.2, 127.2. HRMS *m/z* (ESI) calcd for C<sub>21</sub>H<sub>14</sub>ClN<sub>2</sub>O (M + H)<sup>+</sup> 345.0789, found 345.0788.

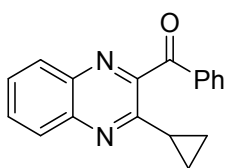

(3-cyclopropylquinoxalin-2-yl)(phenyl)methanone (**2s**)

19.3 mg, 35 % yield; White solid; mp: 74-75 °C; <sup>1</sup>H NMR (400 MHz, CDCl<sub>3</sub>) δ 8.05 (dd, *J* = 8.3, 1.1 Hz, 1H), 8.03 – 7.95 (m, 3H), 7.80 – 7.74 (m, 1H), 7.72 – 7.62 (m, 2H), 7.51 (t, *J* = 7.8 Hz, 2H), 2.34 – 2.24 (m, 1H), 1.39 – 1.32 (m, 2H), 1.11 – 1.03 (m, 2H); <sup>13</sup>C NMR (100 MHz, CDCl<sub>3</sub>) δ 194.4, 156.6, 151.0, 142.4, 139.0, 135.8, 134.2, 130.9, 130.7, 129.4, 129.0, 128.7, 128.6, 14.5, 11.8. HRMS *m/z* (ESI) calcd for C<sub>18</sub>H<sub>15</sub>N<sub>2</sub>O (M + H)<sup>+</sup> 275.1179, found 275.1178.

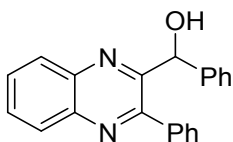

phenyl(3-phenylquinoxalin-2-yl)methanol (**3a**)

52.9 mg, 85% yield; White solid; mp: 147-148 °C; <sup>1</sup>H NMR (400 MHz, CDCl<sub>3</sub>) δ

8.33 – 8.06 (m, 2H), 7.92 – 7.71 (m, 2H), 7.54 – 7.34 (m, 3H), 7.32 – 7.21 (m, 2H), 7.19 – 7.00 (m, 3H), 6.80 (d,  $J = 7.0$  Hz, 2H), 6.13 (d,  $J = 7.0$  Hz, 1H), 5.59 (d,  $J = 7.0$  Hz, 1H);  $^{13}\text{C}$  NMR (100 MHz,  $\text{CDCl}_3$ )  $\delta$  154.4, 154.2, 141.6, 141.2, 139.6, 137.6, 130.4, 130.2, 129.4, 129.2, 128.8, 128.6, 128.6, 128.3, 127.8, 127.6, 72.9. HRMS  $m/z$  (ESI) calcd for  $\text{C}_{21}\text{H}_{17}\text{N}_2\text{O}$  ( $\text{M} + \text{H}$ ) $^+$  313.1335, found 313.1335.

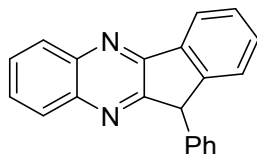

11-phenyl-11*H*-indeno[1,2-*b*]quinoxaline (**4a**)

31.1 mg, 53 % yield; Light brown solid; mp: 169-170 °C;  $^1\text{H}$  NMR (400 MHz,  $\text{CDCl}_3$ )  $\delta$  8.28 (d,  $J = 7.0$  Hz, 1H), 8.17 (d,  $J = 8.2$  Hz, 1H), 8.05 (d,  $J = 8.1$  Hz, 1H), 7.78 – 7.62 (m, 2H), 7.60 – 7.41 (m, 3H), 7.35 – 7.21 (m, 3H), 7.18 (d,  $J = 6.9$  Hz, 2H), 5.28 (s, 1H);  $^{13}\text{C}$  NMR (100 MHz,  $\text{CDCl}_3$ )  $\delta$  162.4, 154.4, 148.2, 142.4, 141.7, 139.2, 137.4, 131.6, 129.5, 129.1, 128.9, 128.8, 128.7, 128.7, 128.6, 127.4, 126.2, 122.5, 52.6. HRMS  $m/z$  (ESI) calcd for  $\text{C}_{21}\text{H}_{15}\text{N}_2$  ( $\text{M} + \text{H}$ ) $^+$  295.1230, found 295.1232.

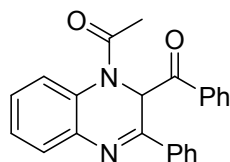

1-(2-benzoyl-3-phenylquinoxalin-1(2*H*)-yl)ethan-1-one (**5a**)

56.6 mg, 32% yield; Yellow solid; mp: 56-58 °C;  $^1\text{H}$  NMR (400 MHz,  $\text{CDCl}_3$ )  $\delta$  8.11 – 8.05 (m, 2H), 8.02 (d,  $J = 7.4$  Hz, 2H), 7.67 – 7.57 (m, 2H), 7.56 (s, 1H), 7.53 – 7.43 (m, 5H), 7.31 (td,  $J = 7.8, 1.0$  Hz, 1H), 7.13 (td,  $J = 7.8, 1.3$  Hz, 1H), 6.95 (d,  $J = 7.8$  Hz, 1H), 2.28 (s, 3H);  $^{13}\text{C}$  NMR (100 MHz,  $\text{CDCl}_3$ )  $\delta$  194.3, 169.8, 164.3, 139.9, 136.5, 134.2, 133.8, 131.4, 128.8, 128.7, 128.7, 127.9, 127.3, 127.3, 127.2, 126.8, 123.7, 53.6, 21.9. HRMS  $m/z$  (ESI) calcd for  $\text{C}_{23}\text{H}_{19}\text{N}_2\text{O}_2$  ( $\text{M} + \text{H}$ ) $^+$  355.1441, found 355.1440.

## 6. NMR Spectra of compounds 1a-1s, 2a-2s, 3a, 4a, 5a:

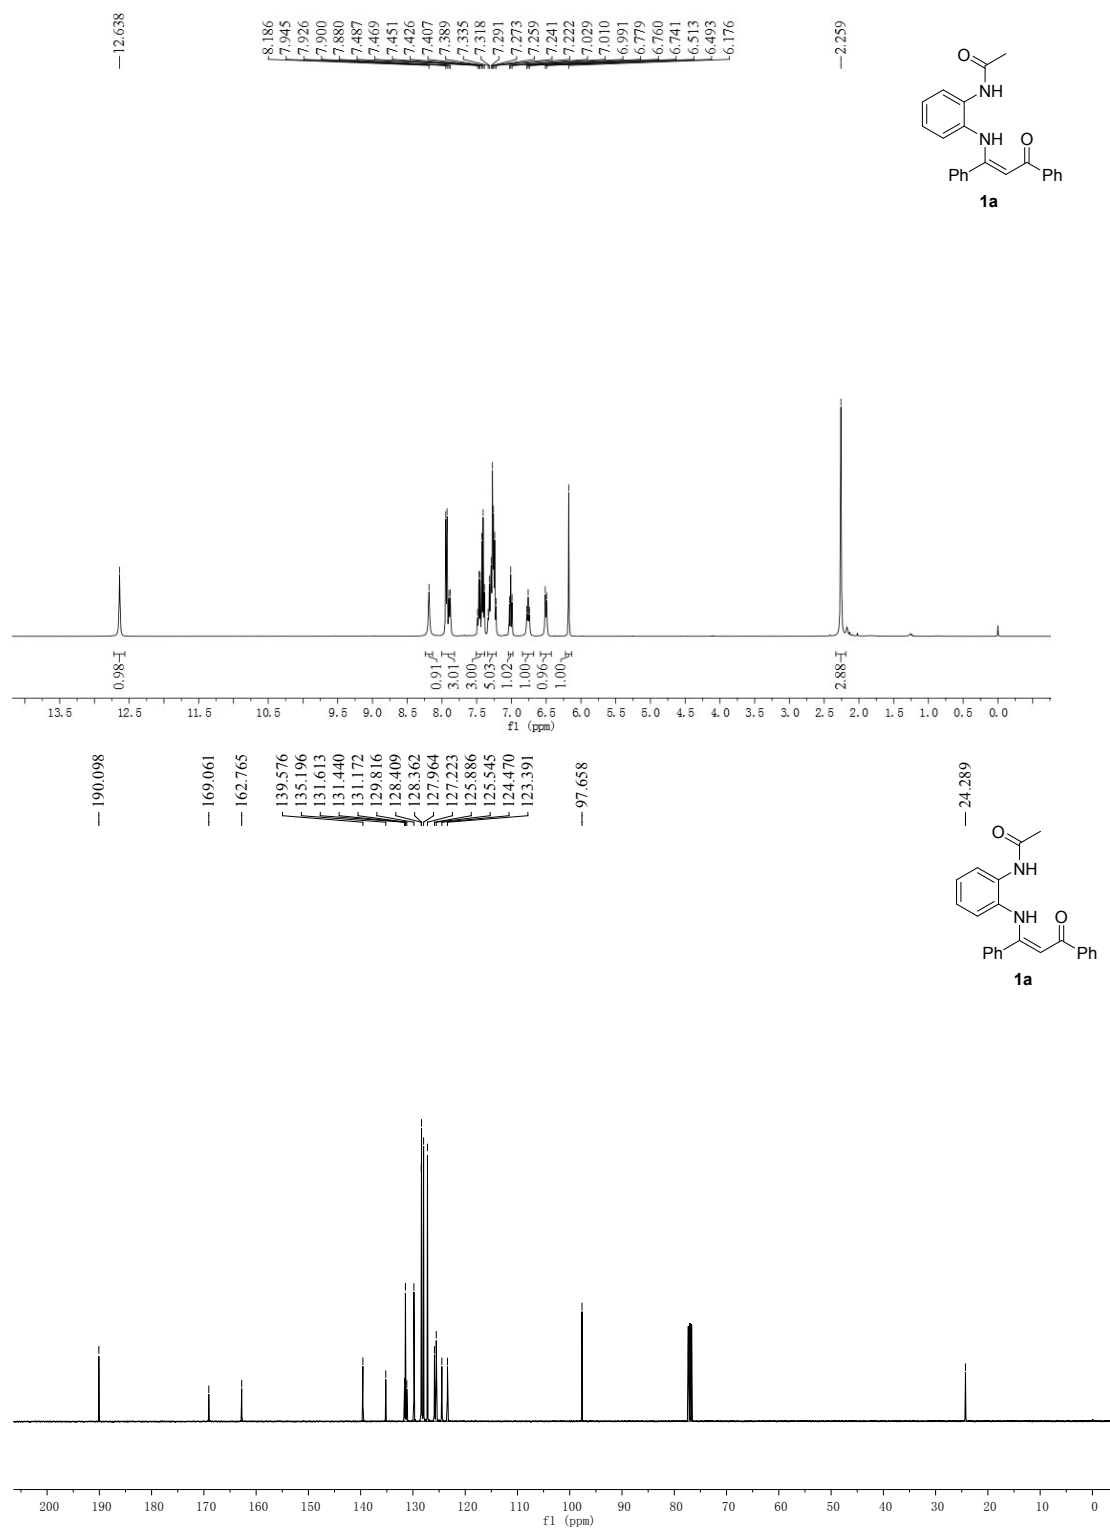

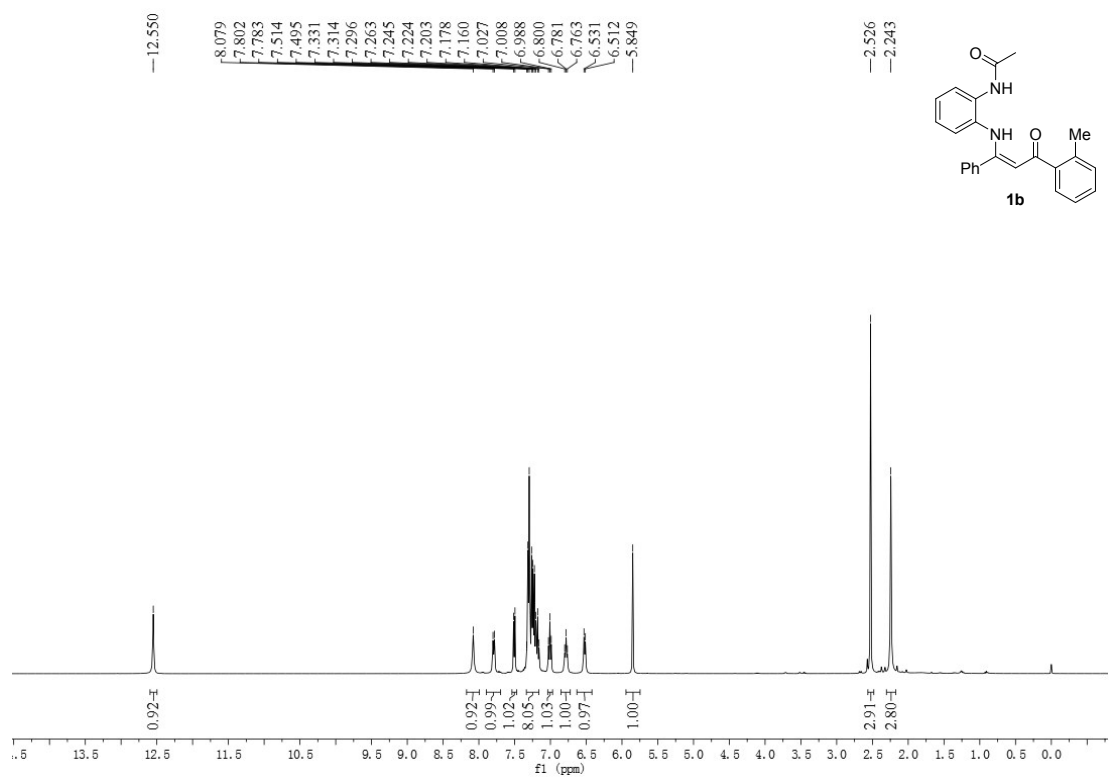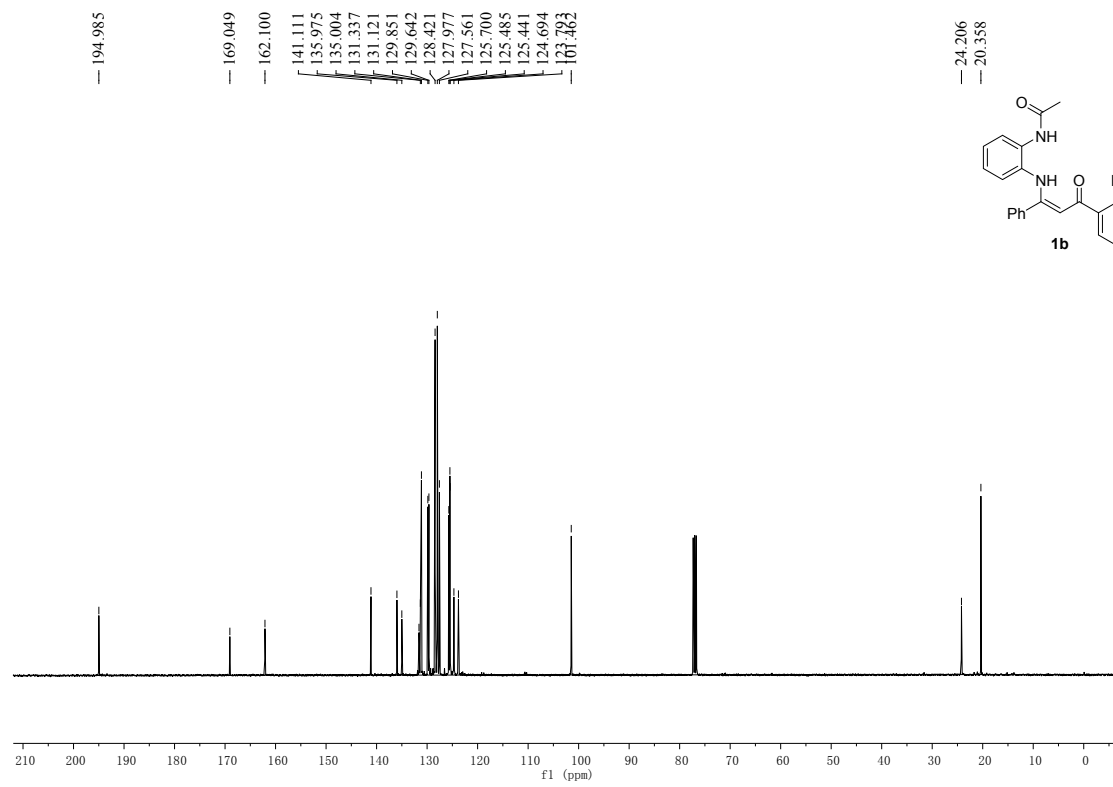



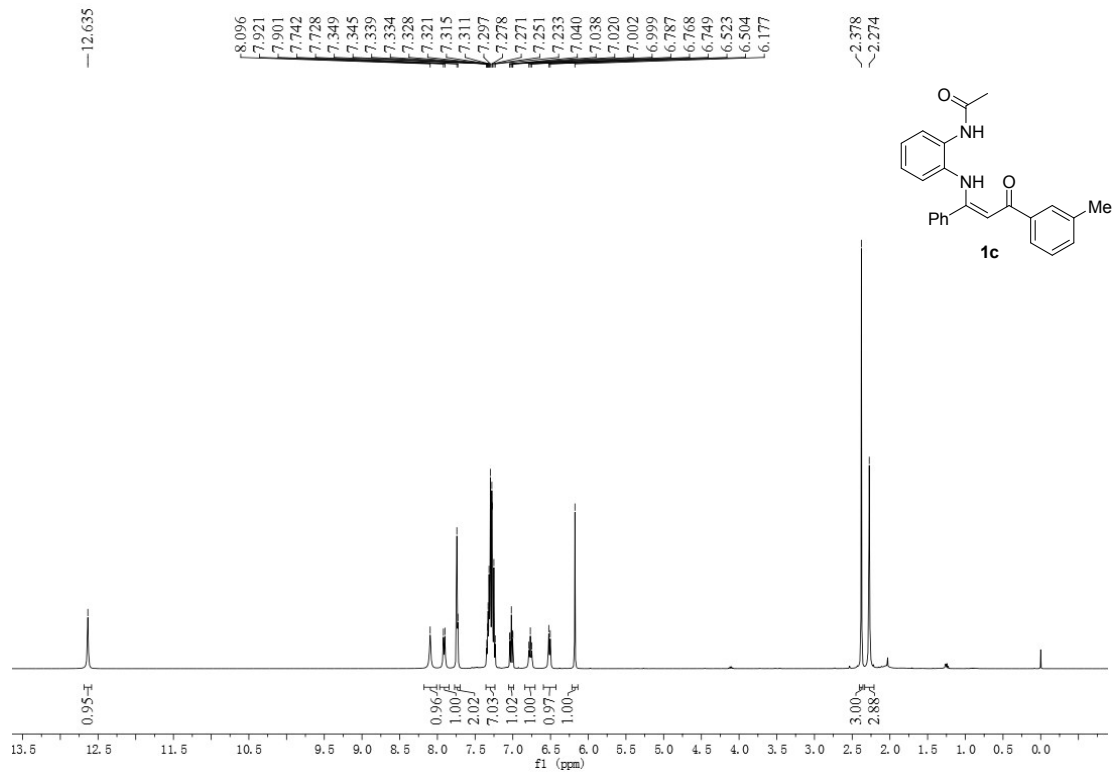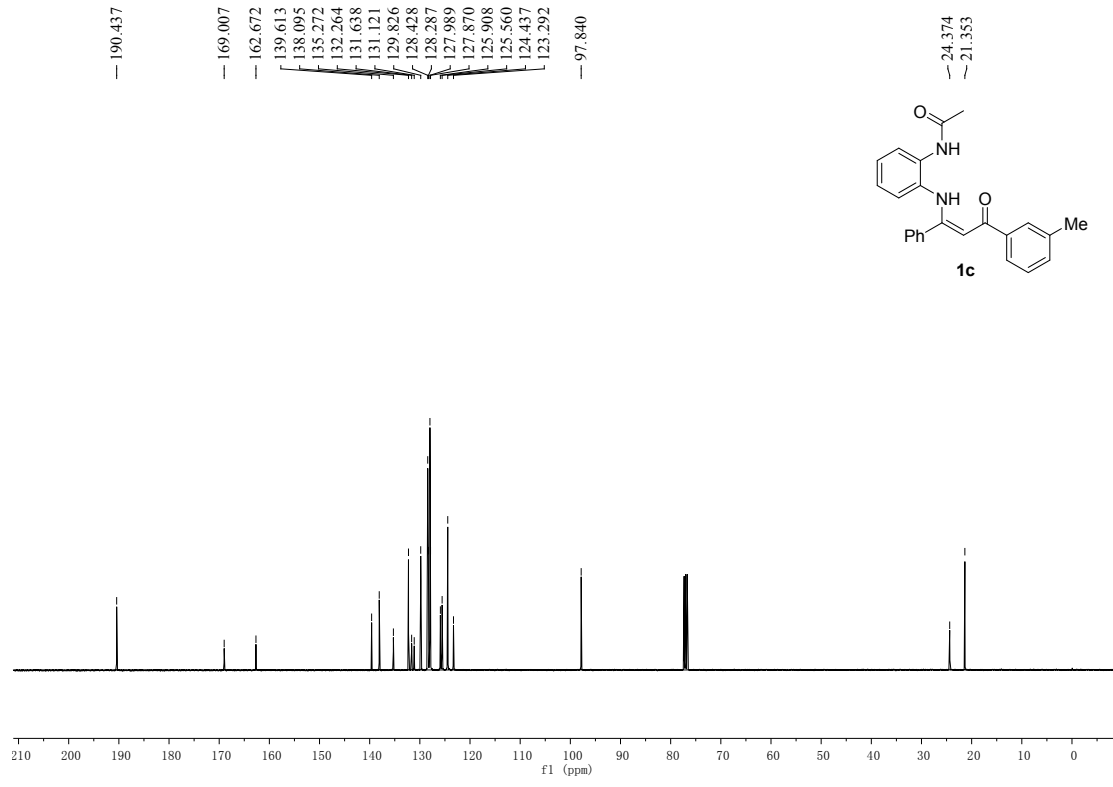

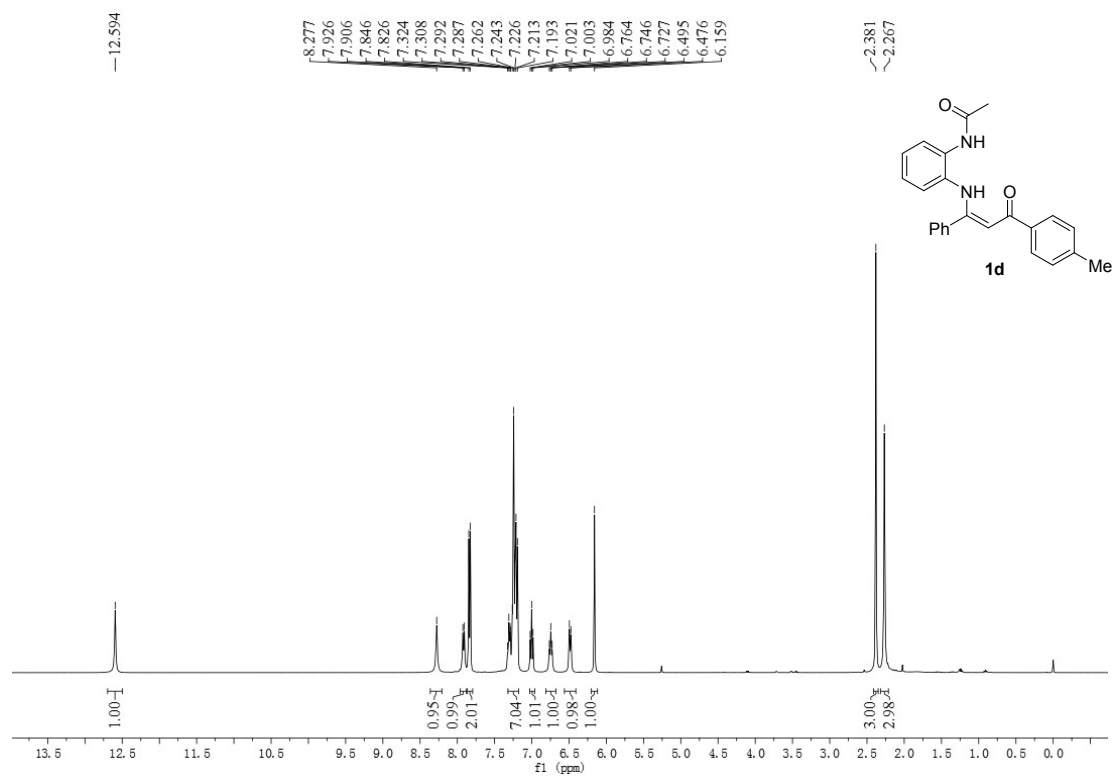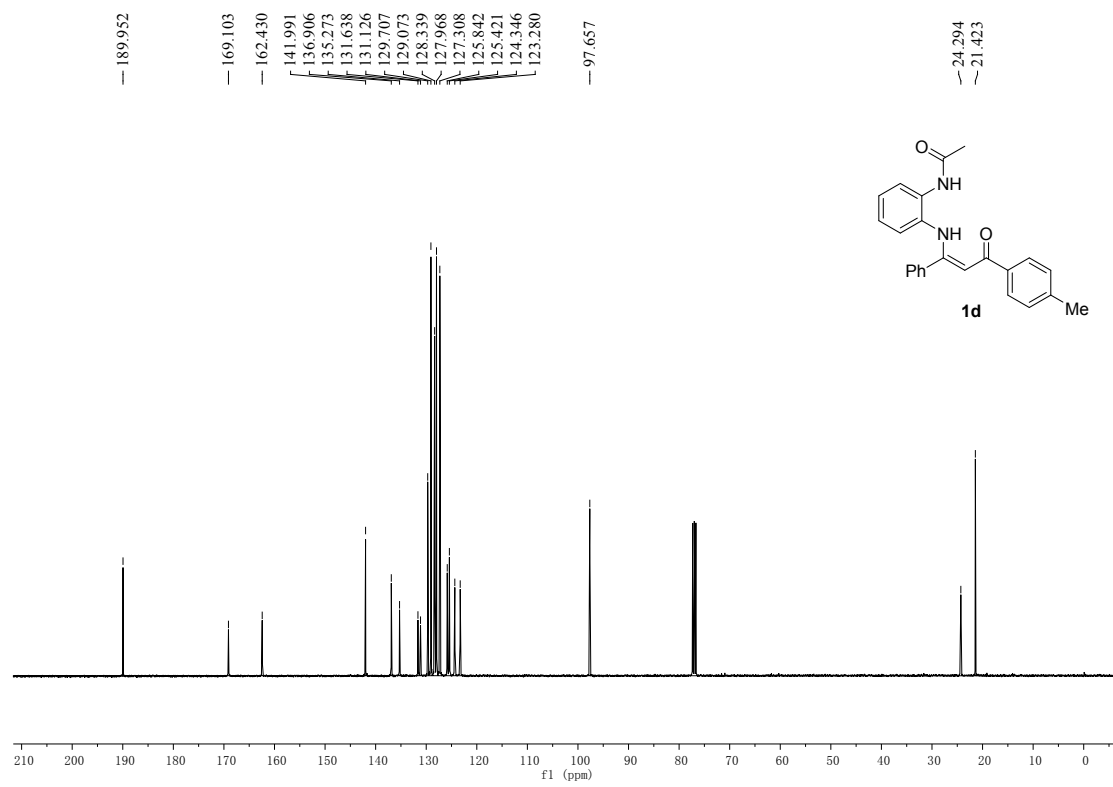

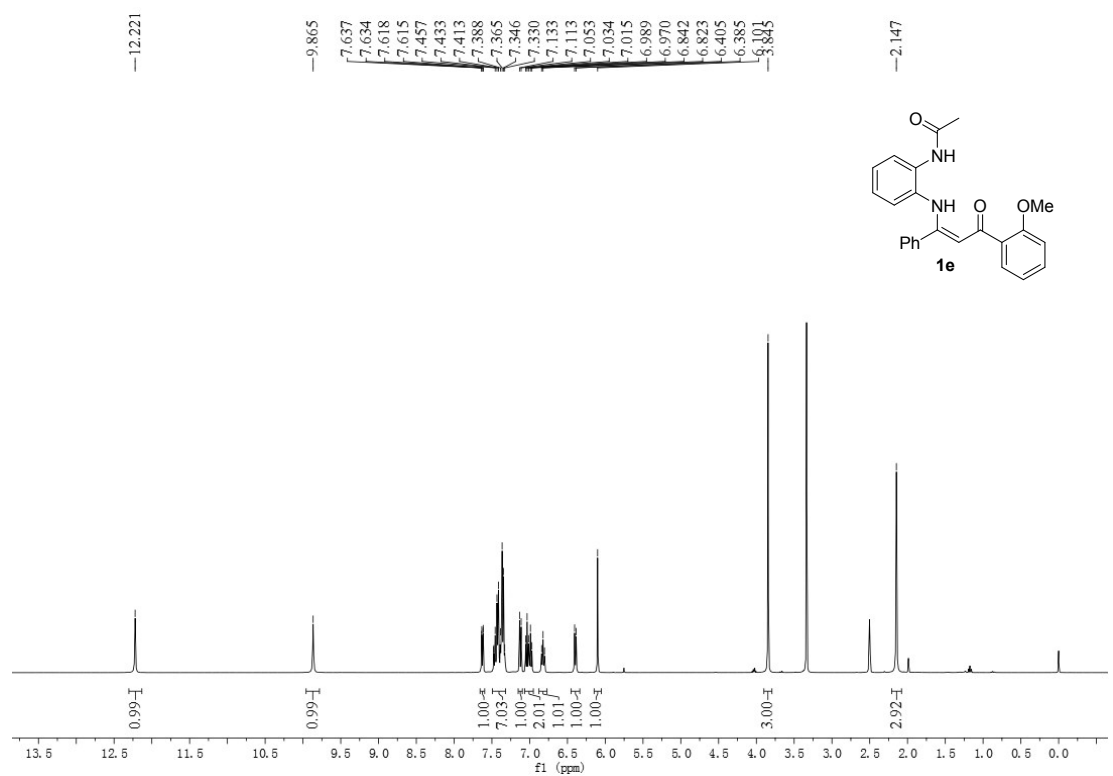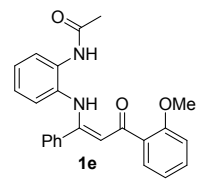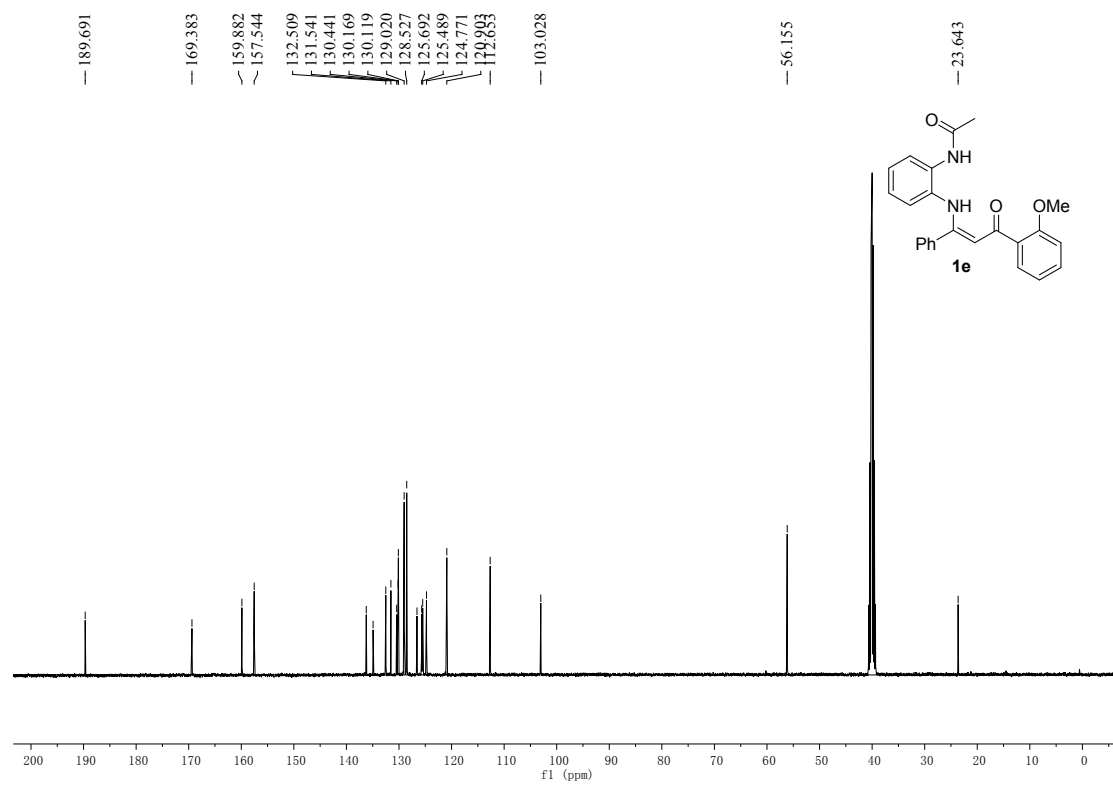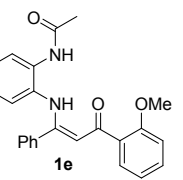

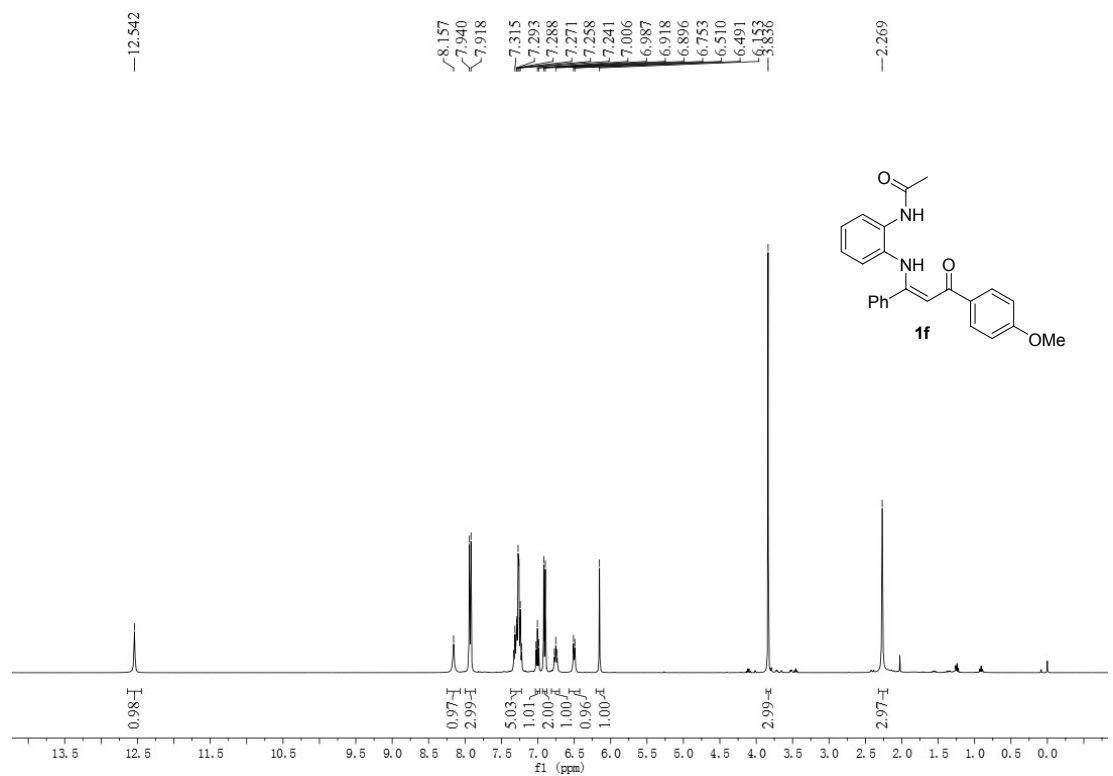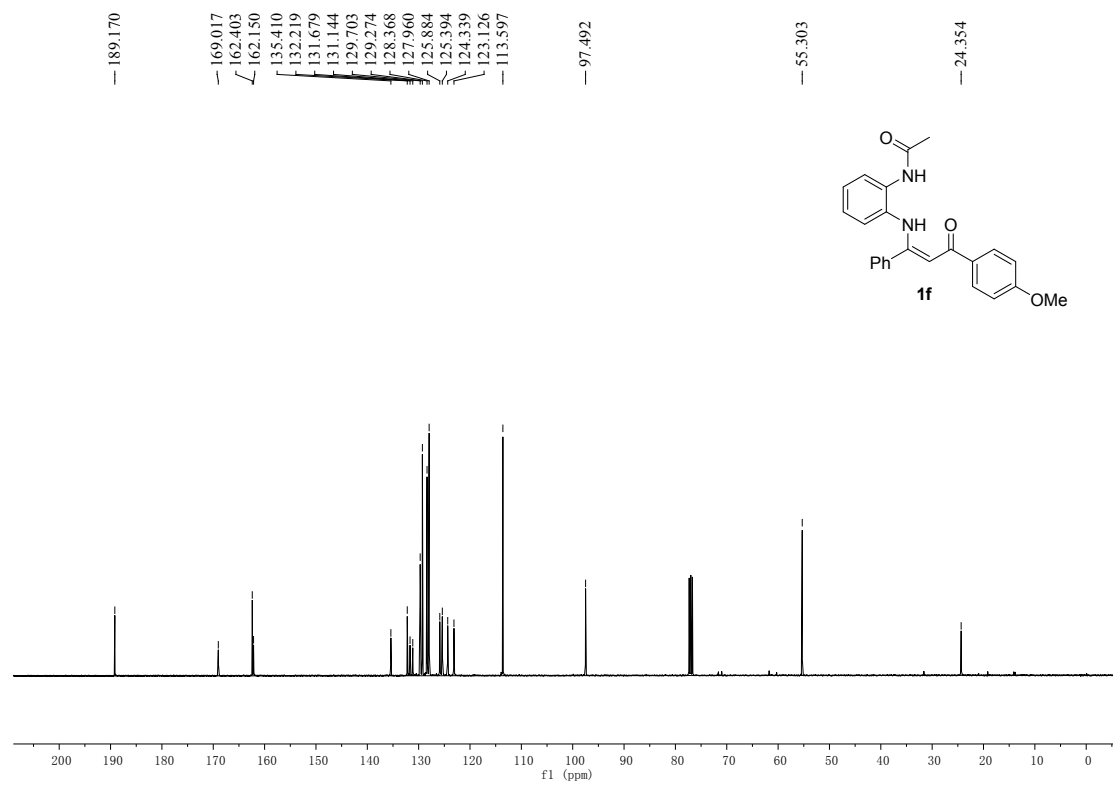

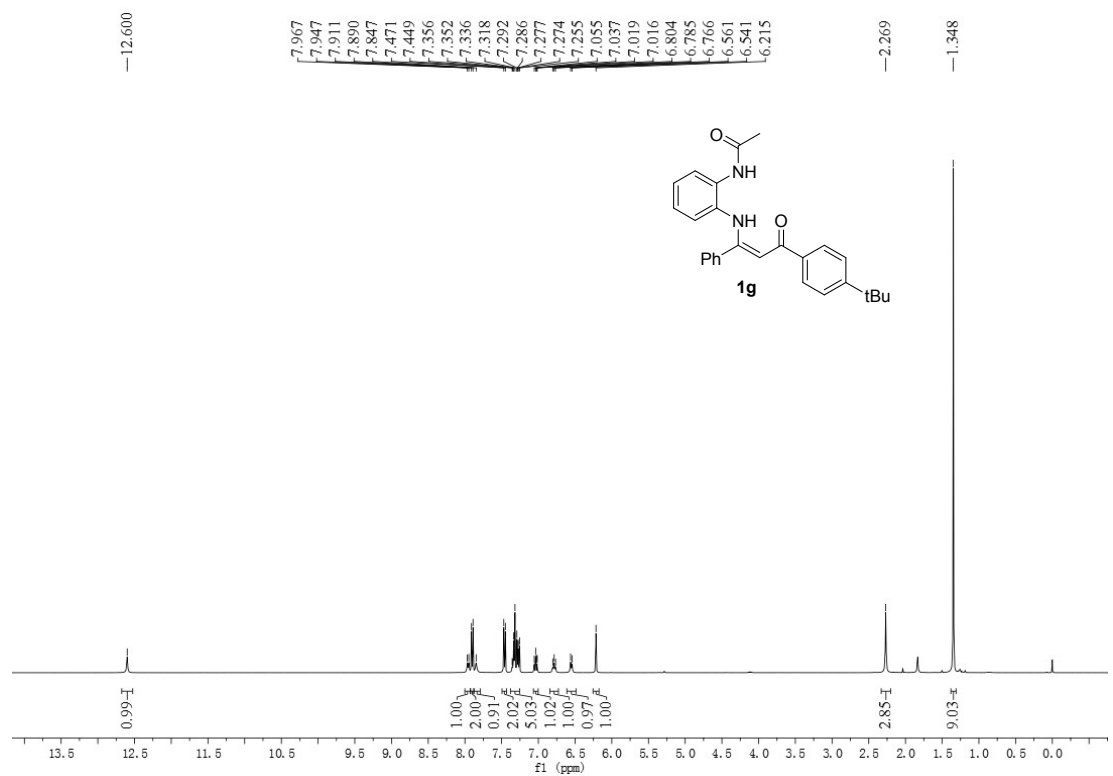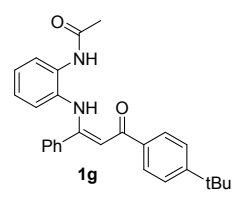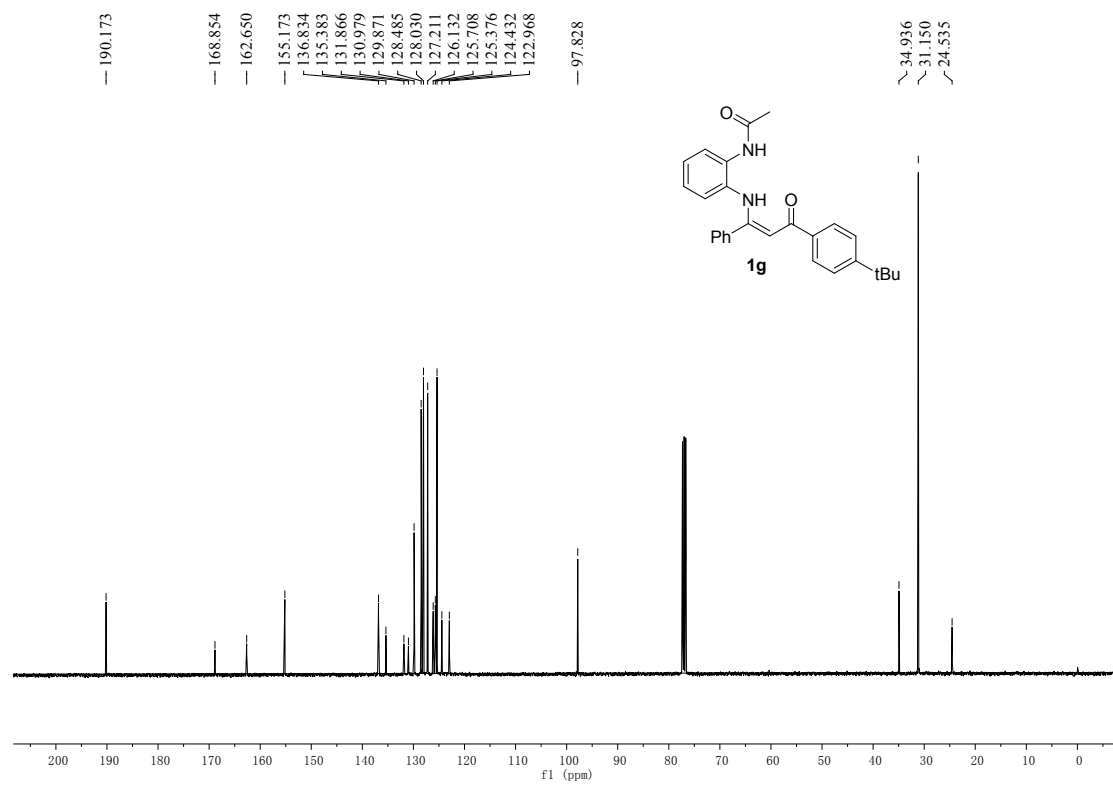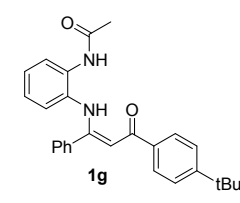

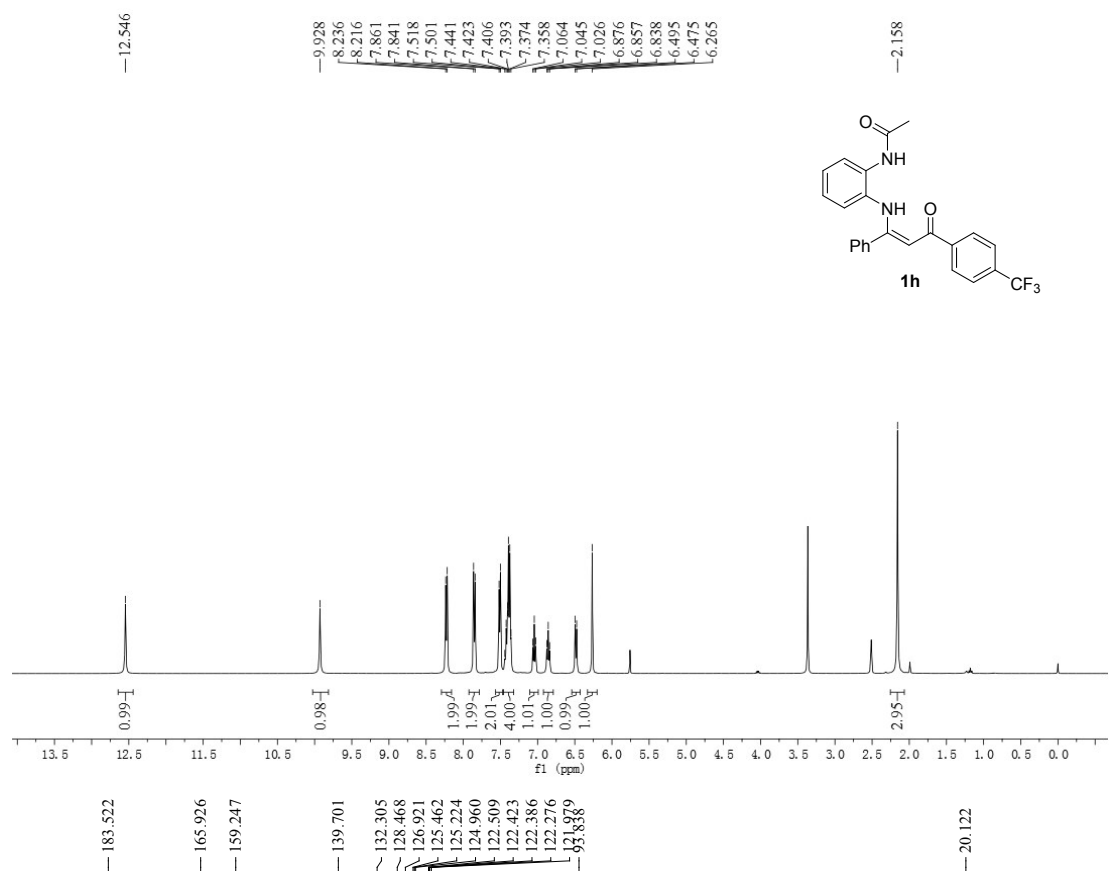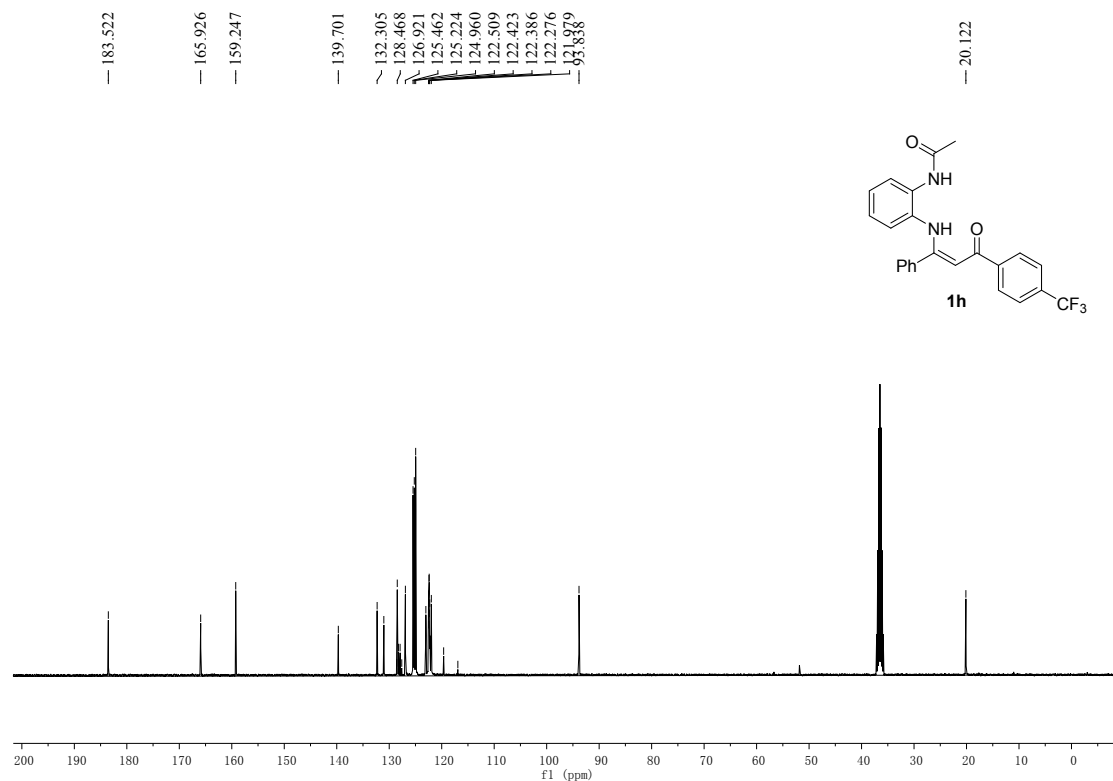

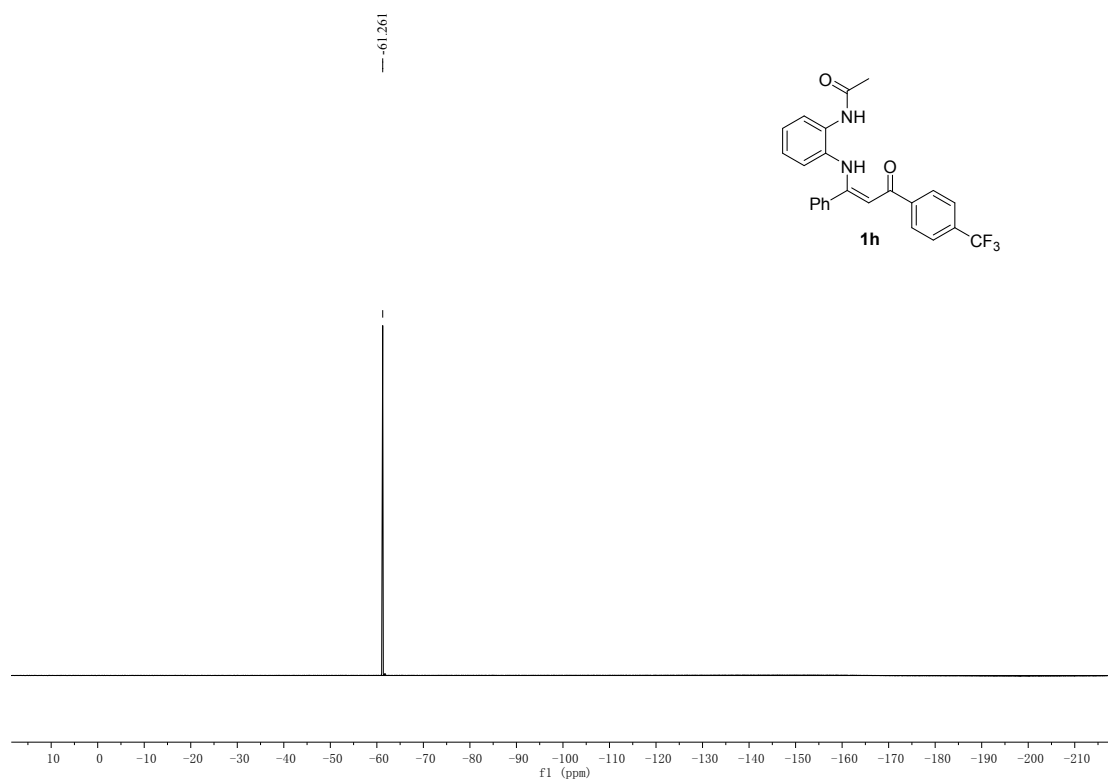

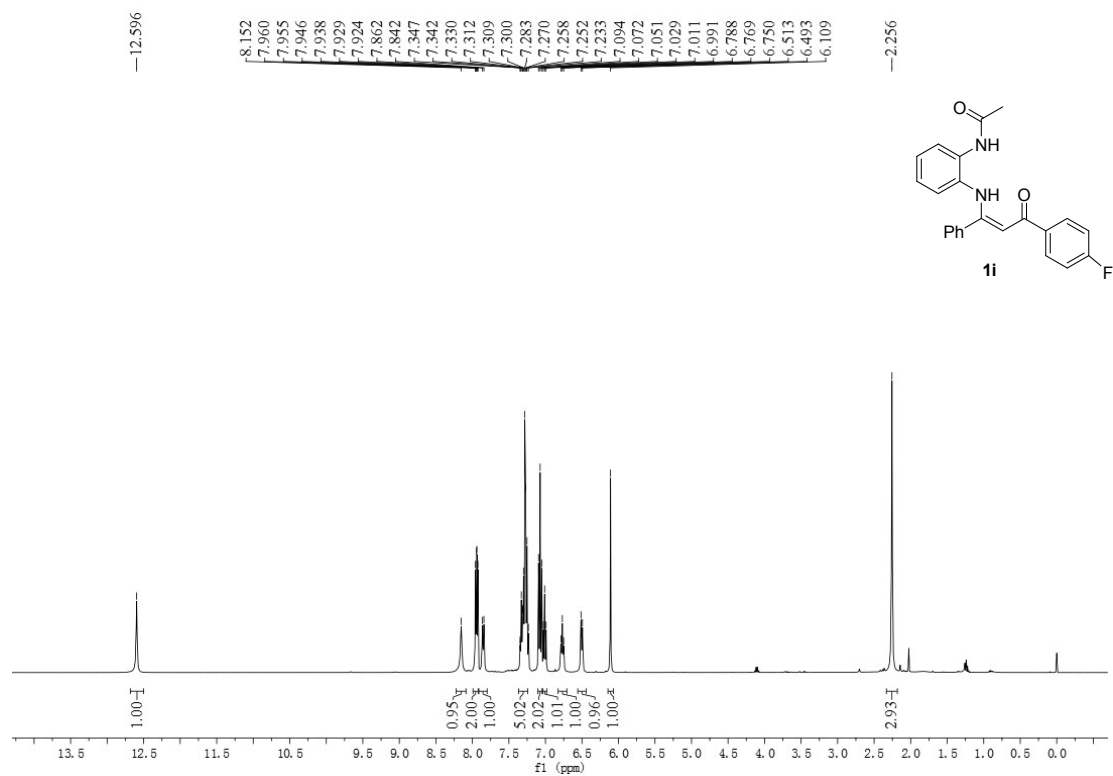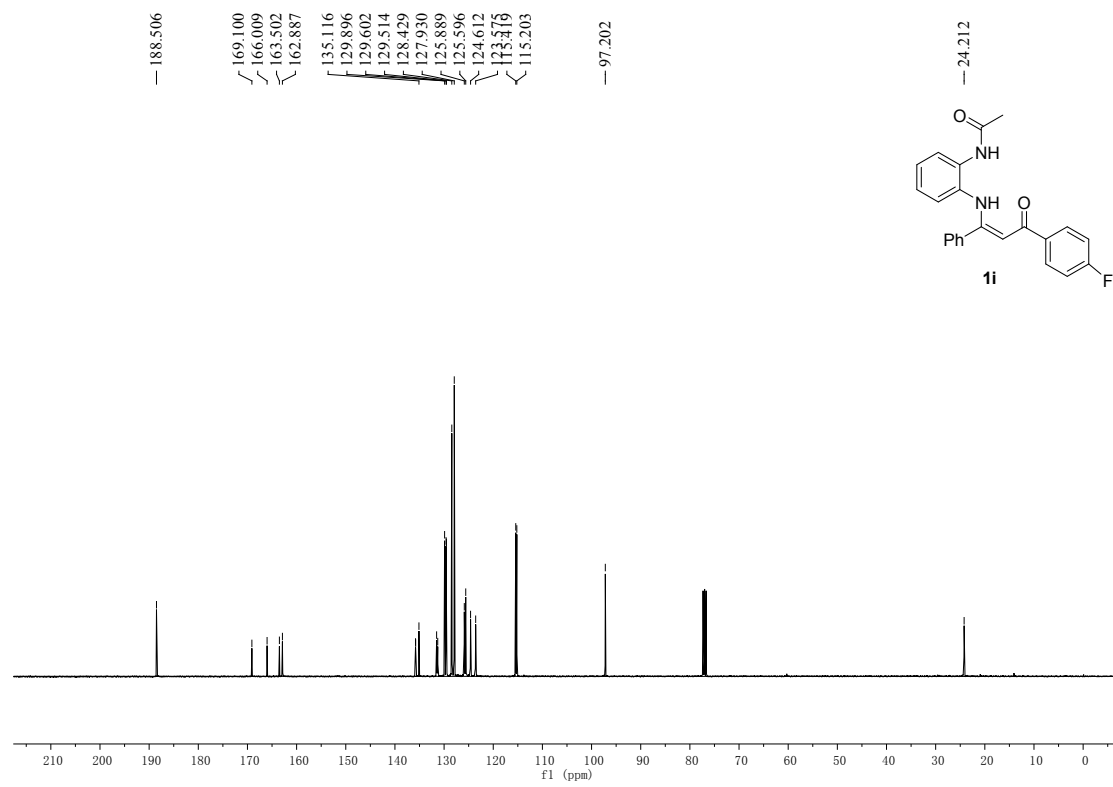



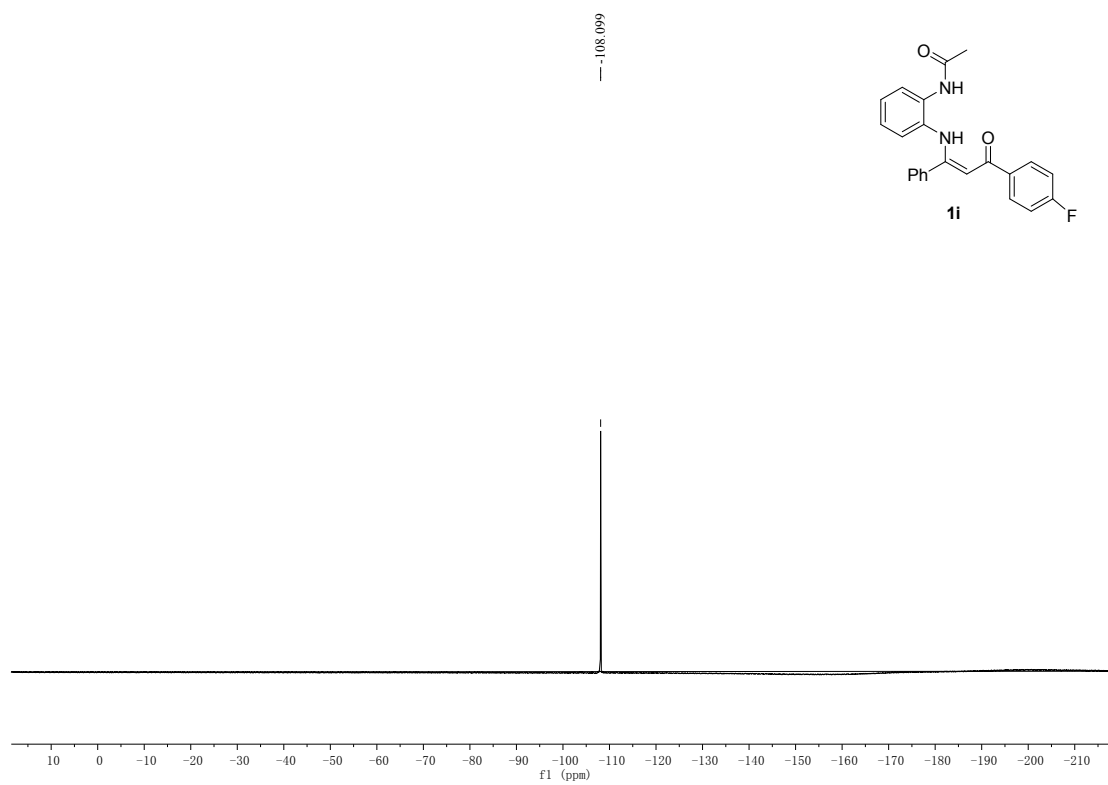

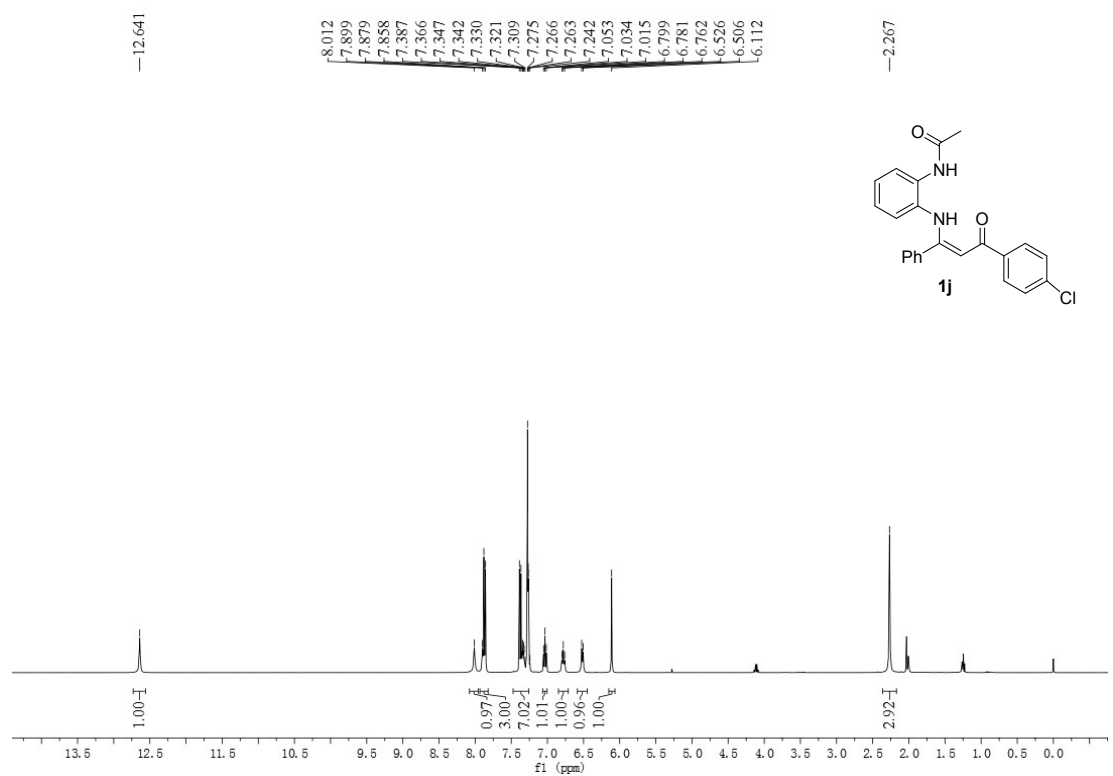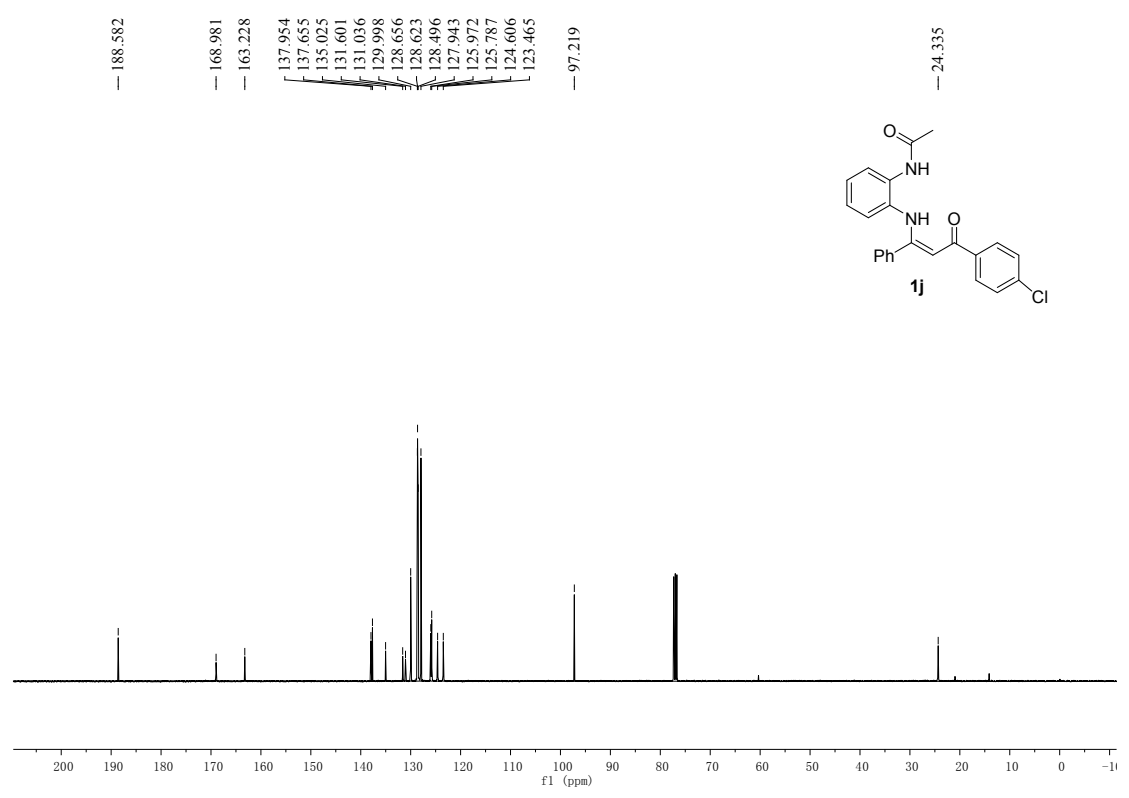

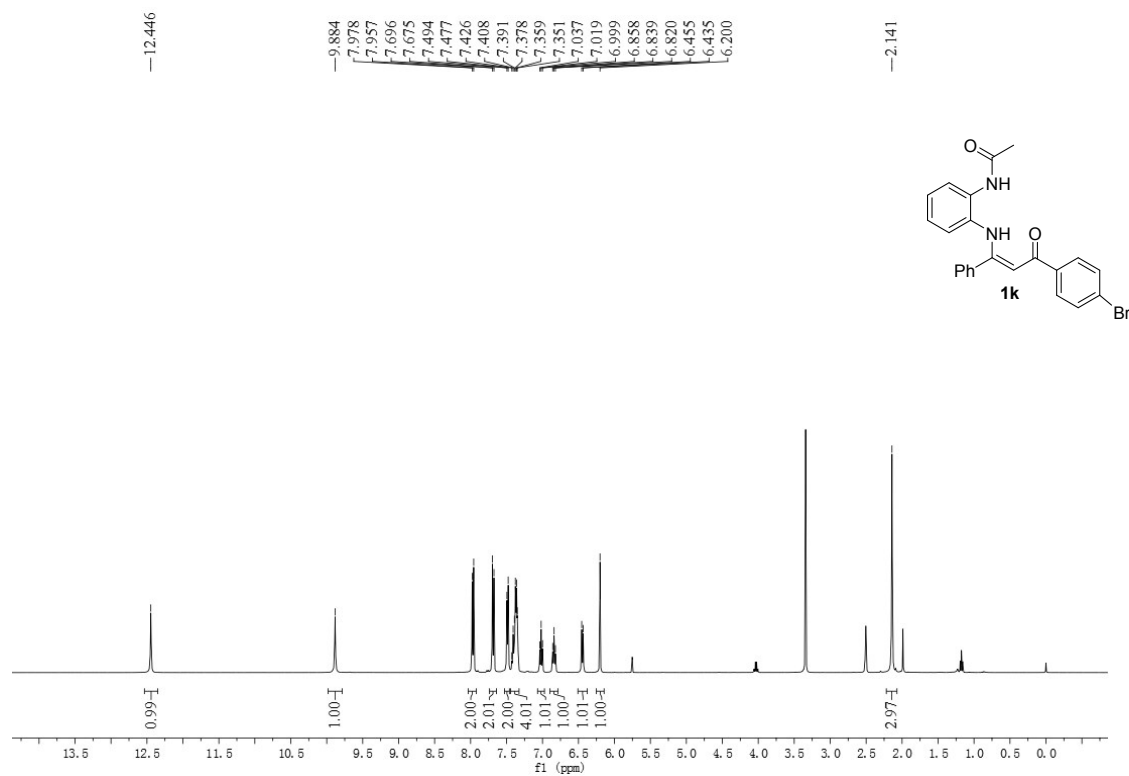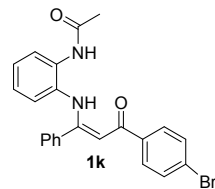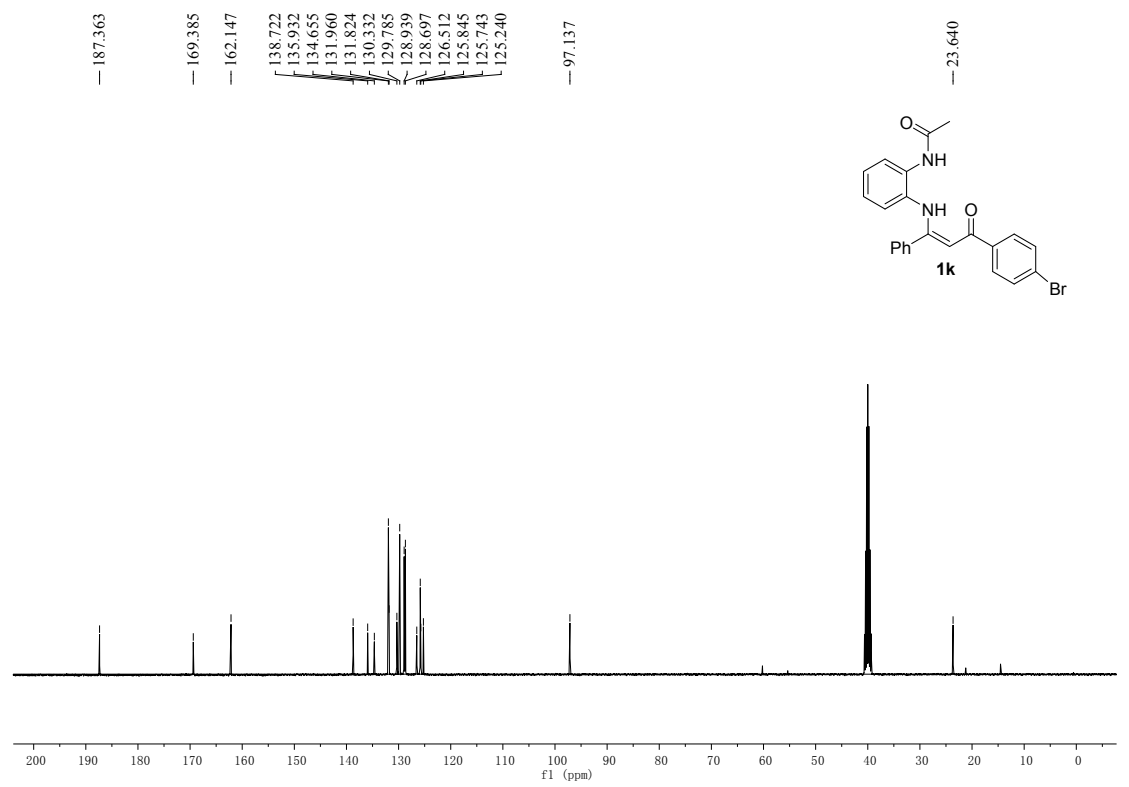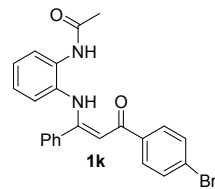

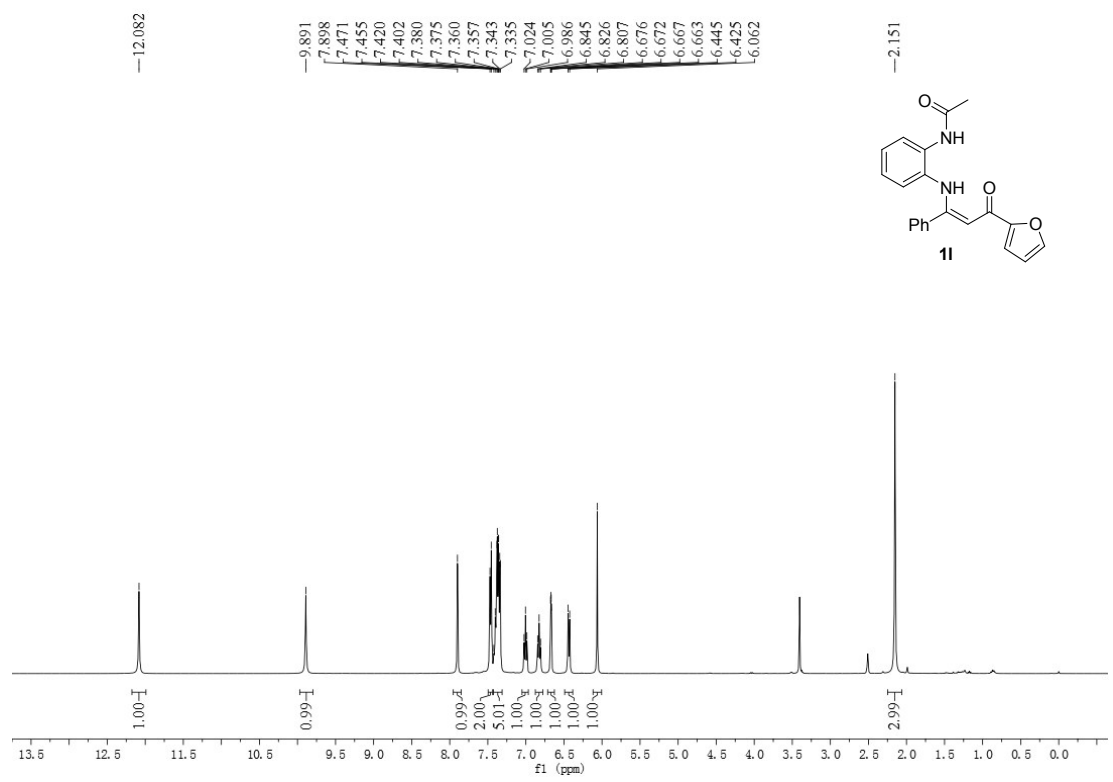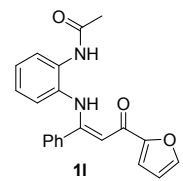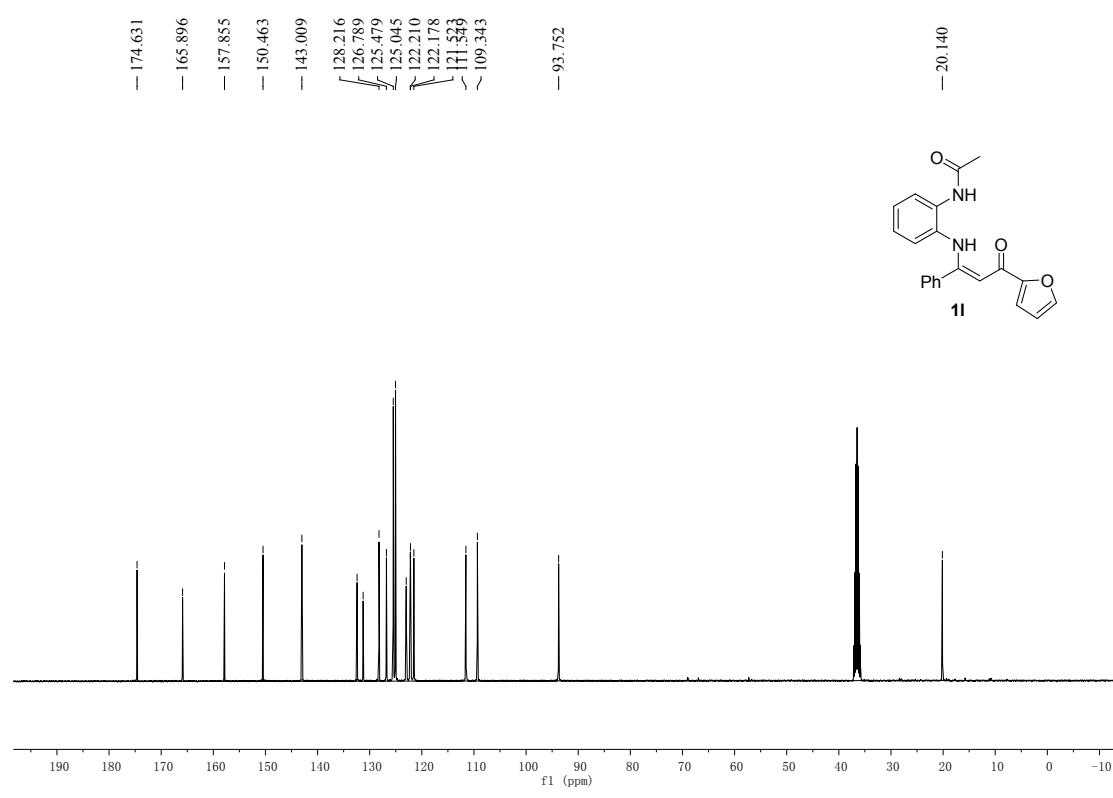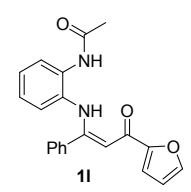

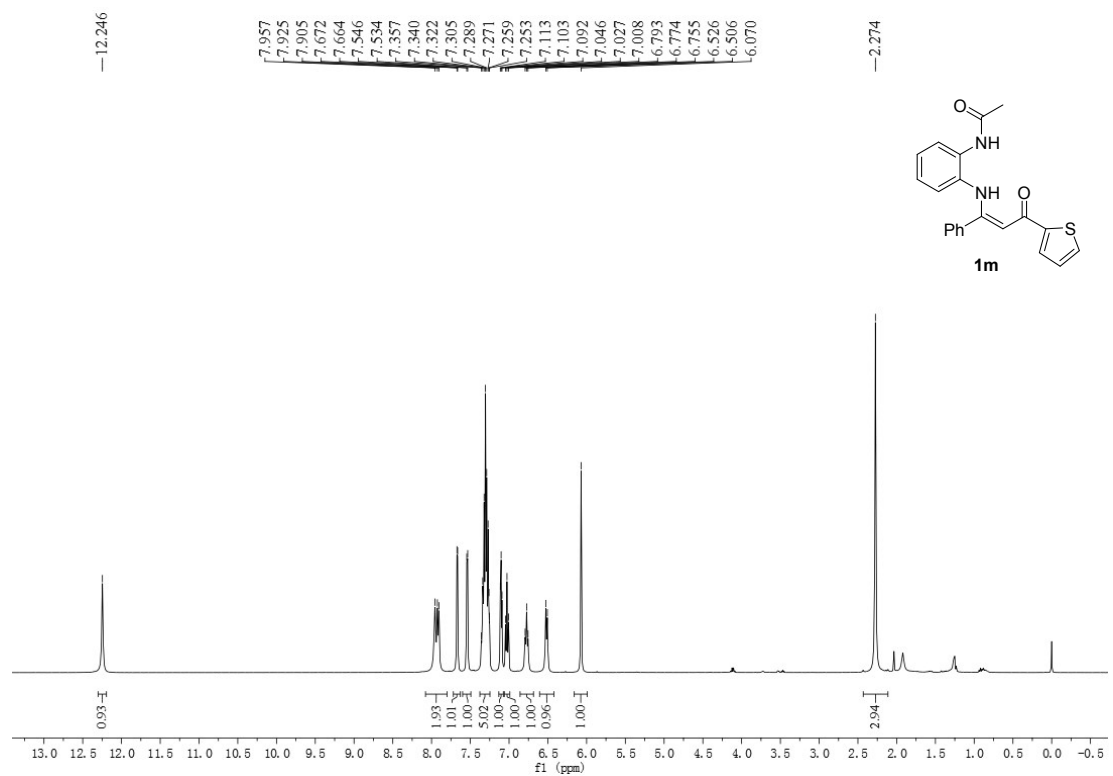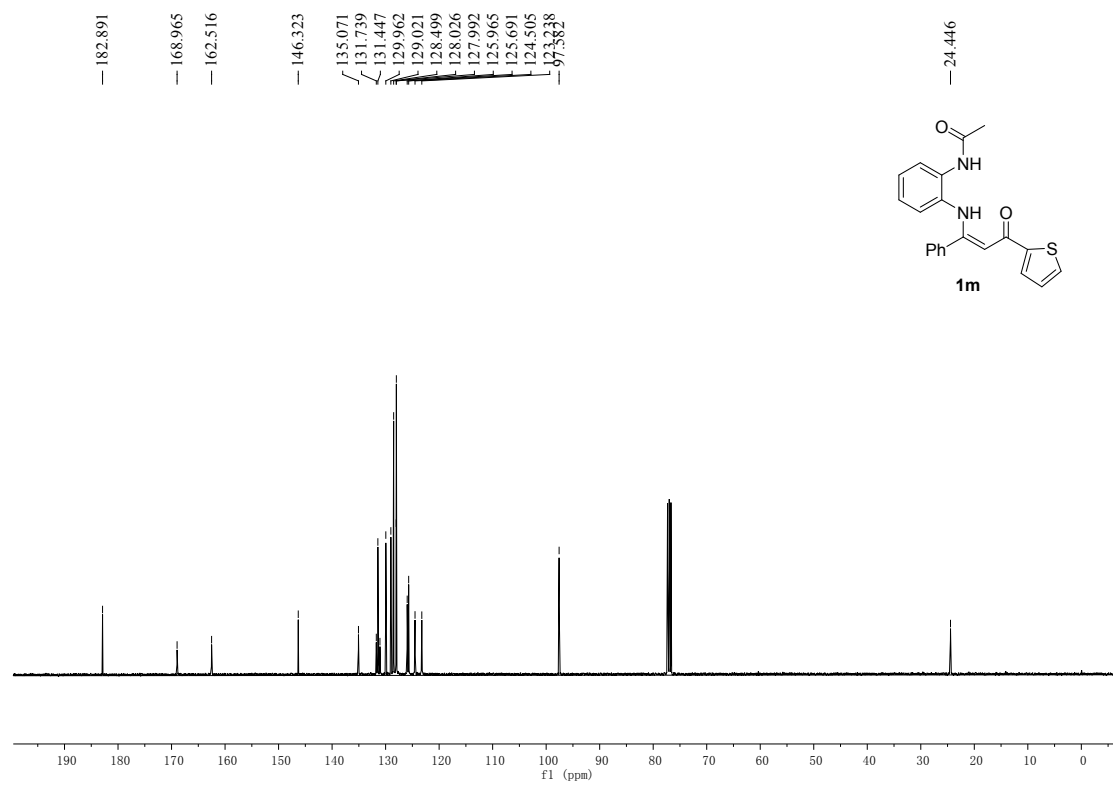

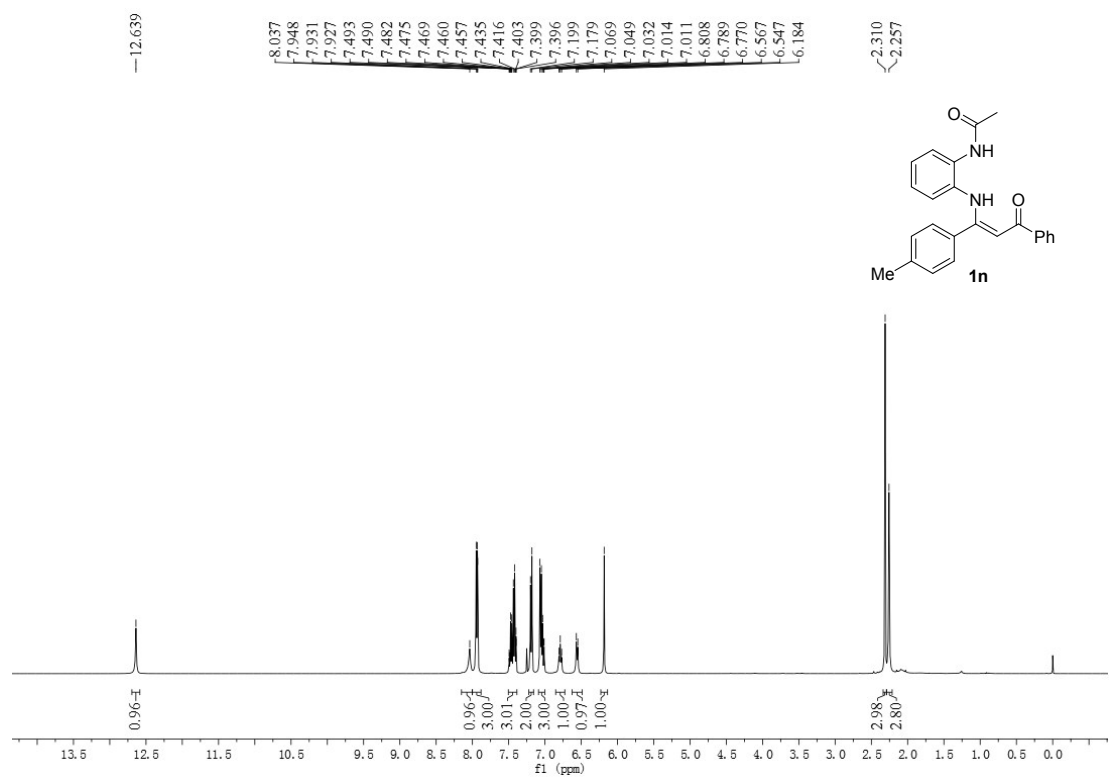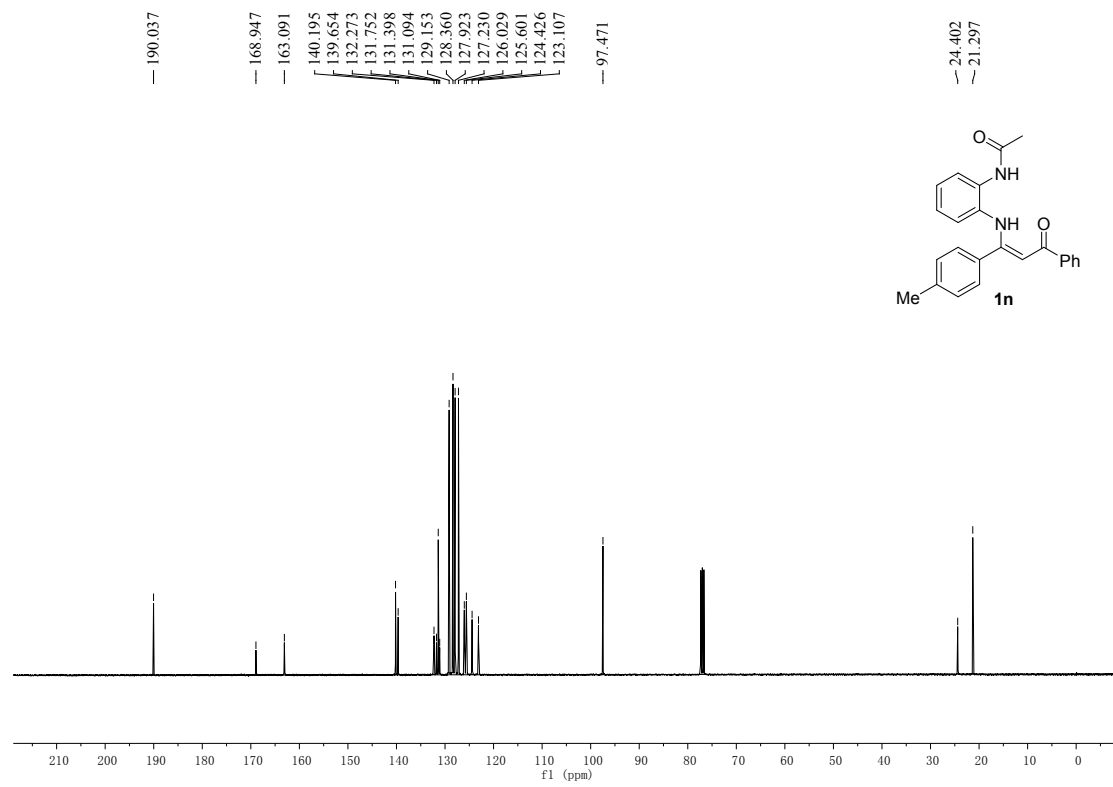

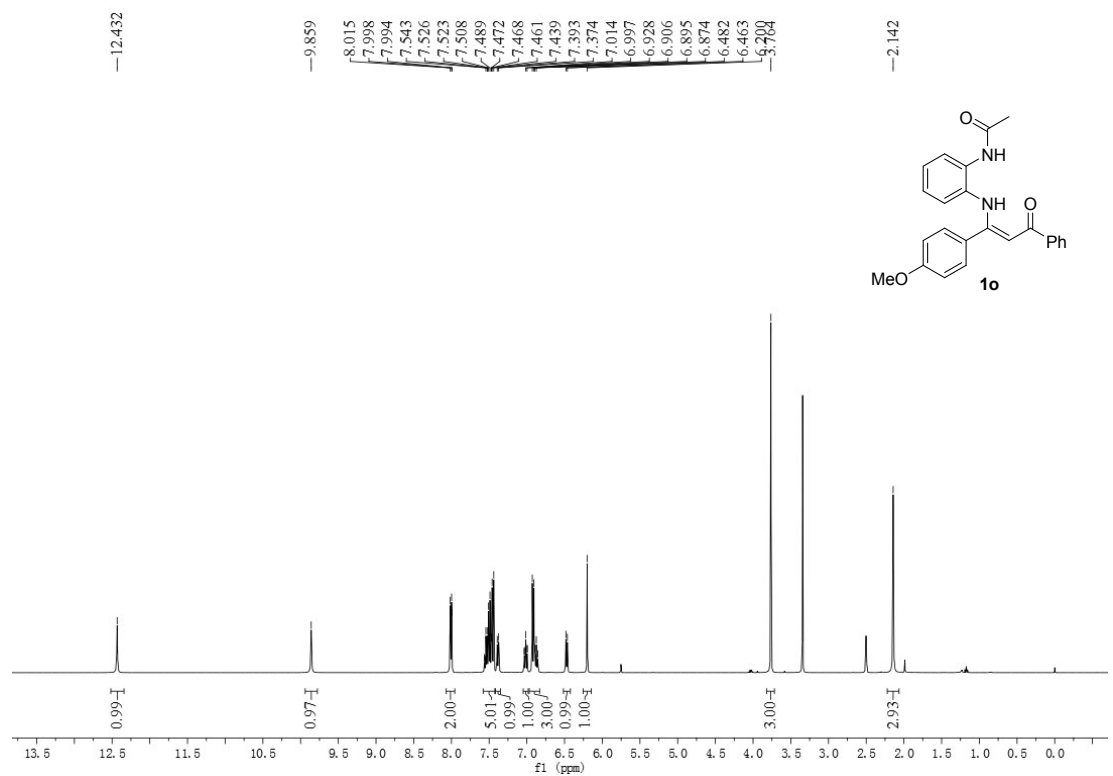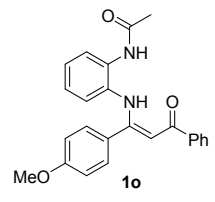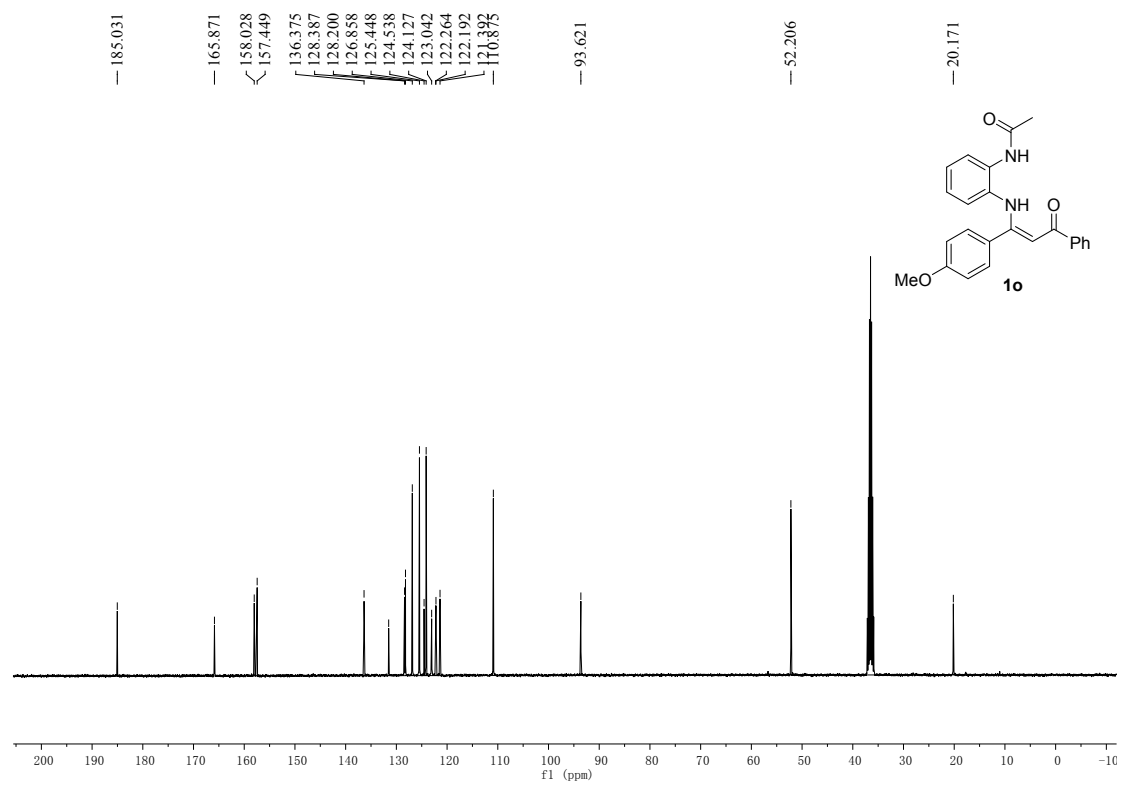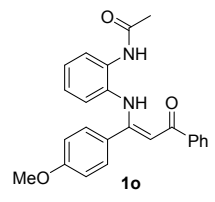

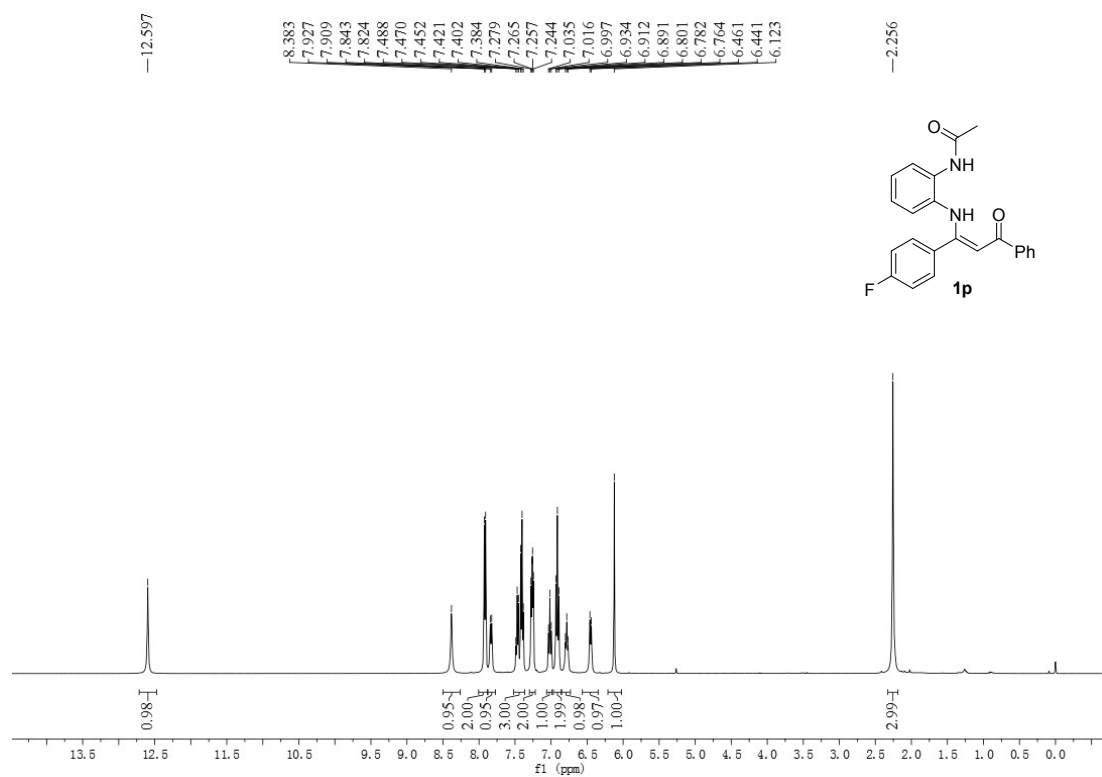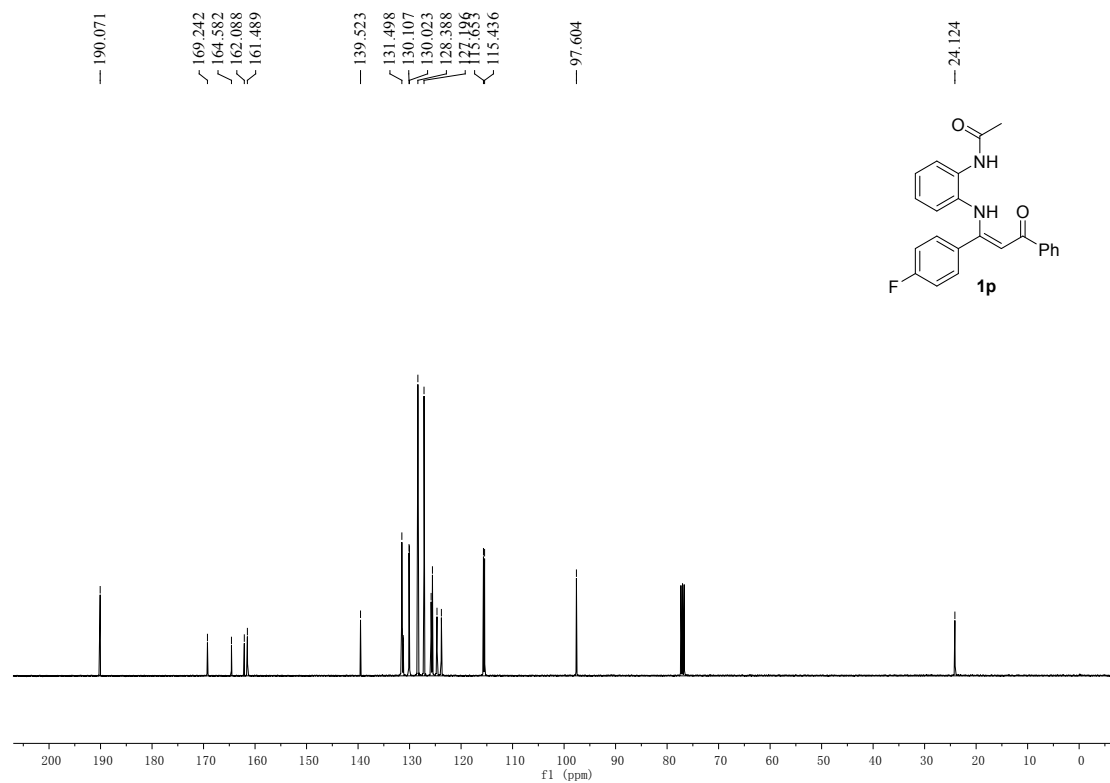



—109.760

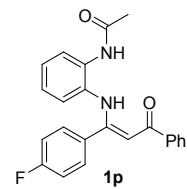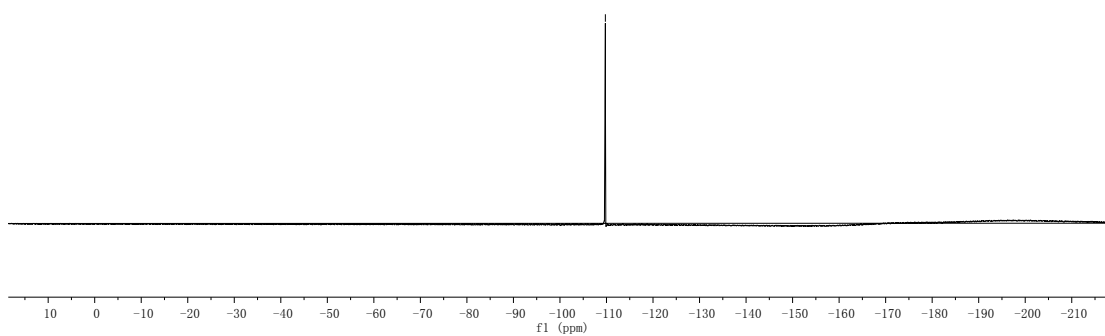

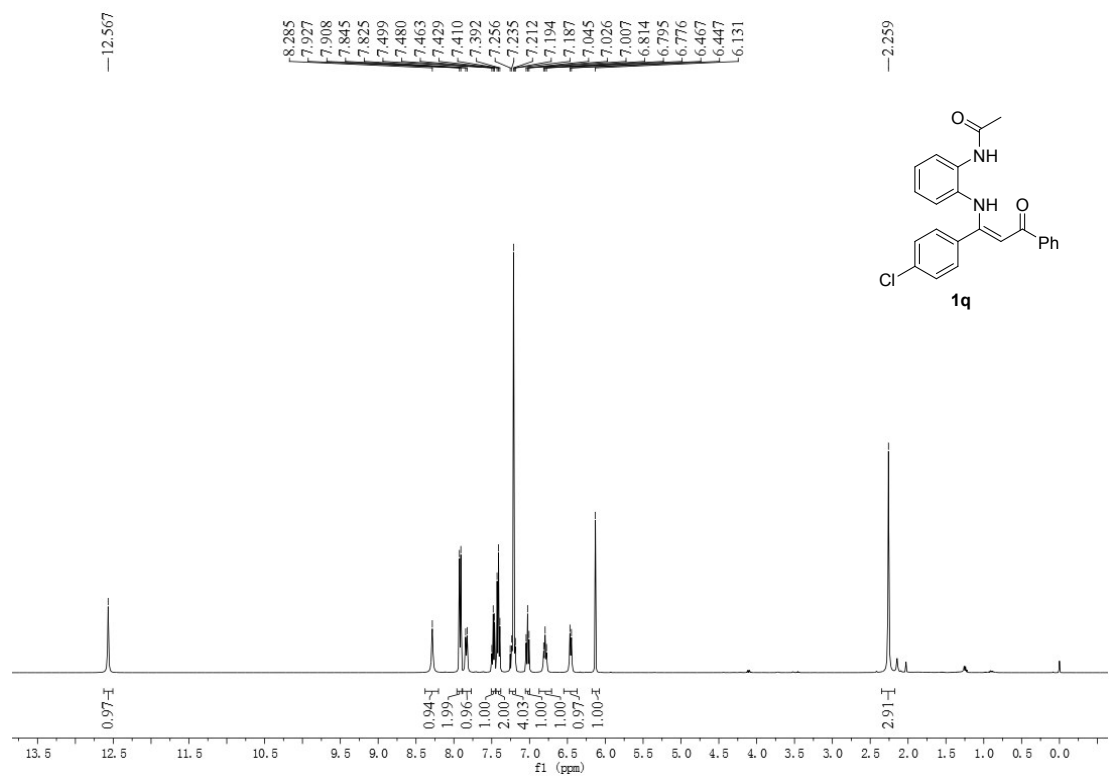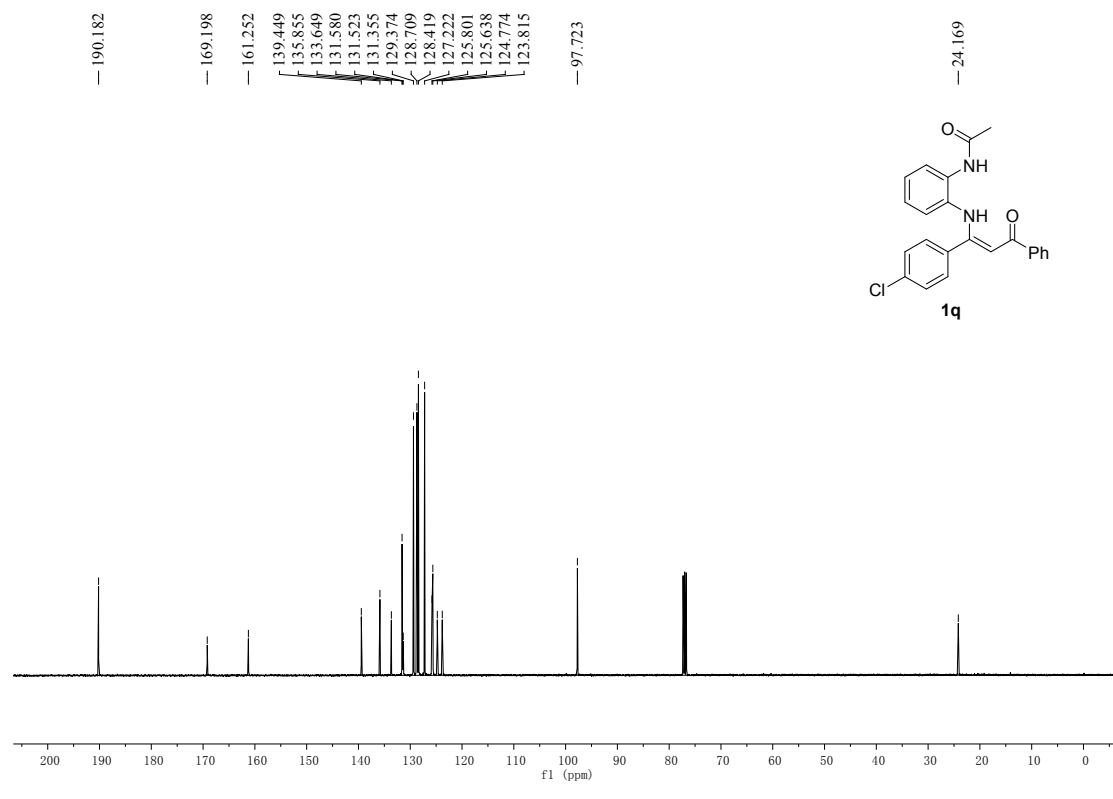

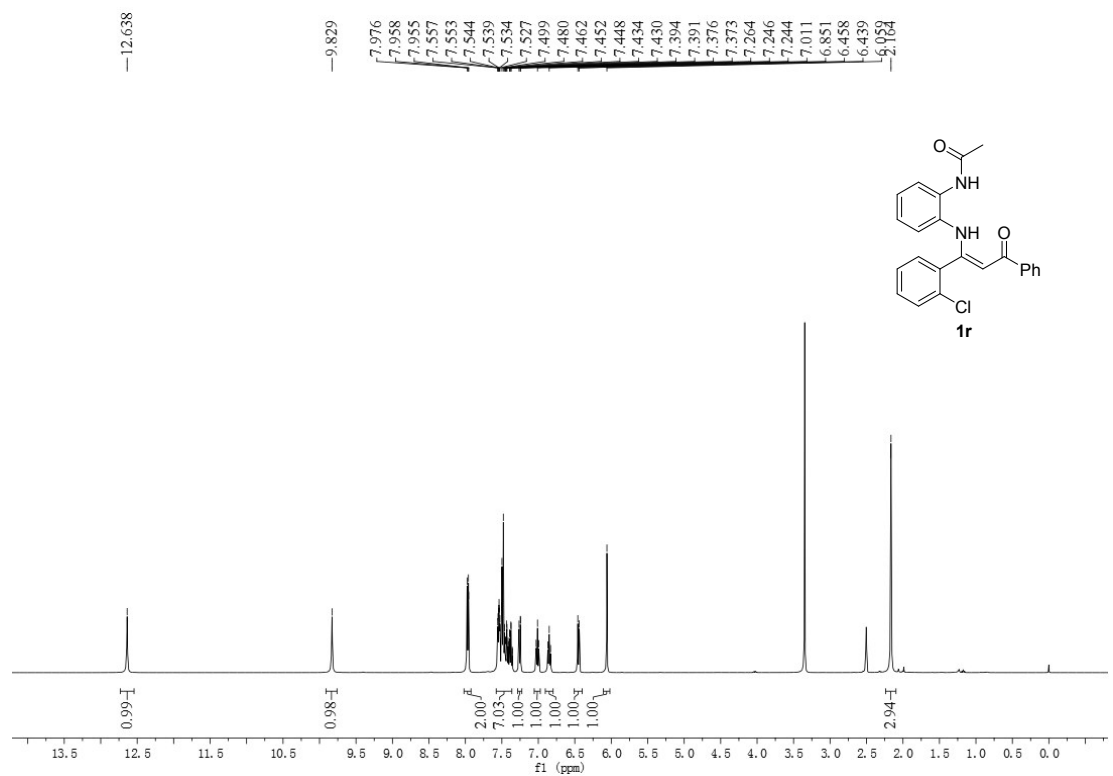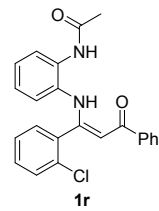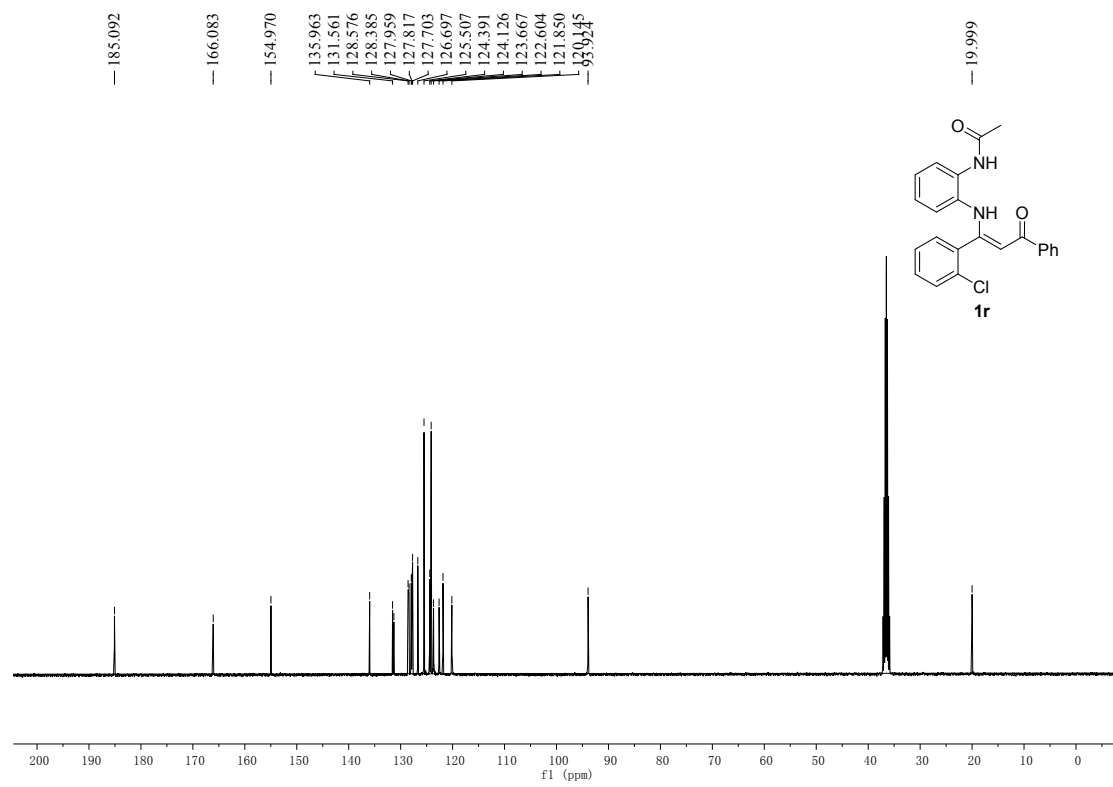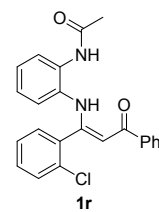

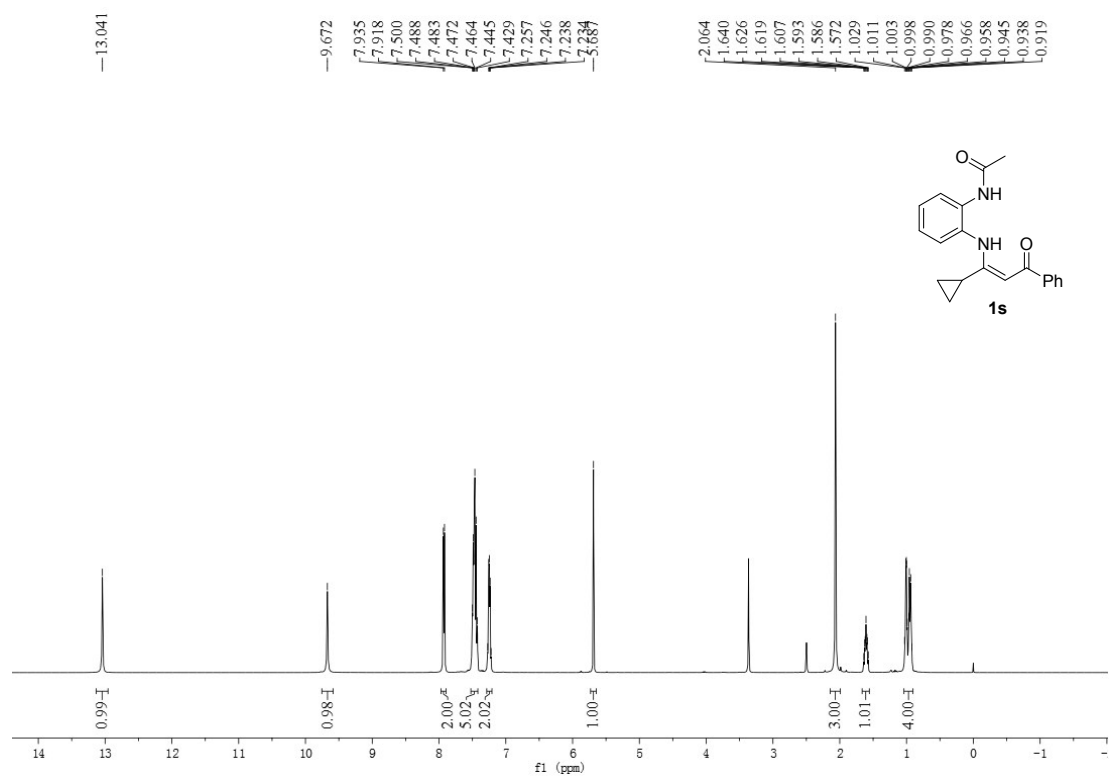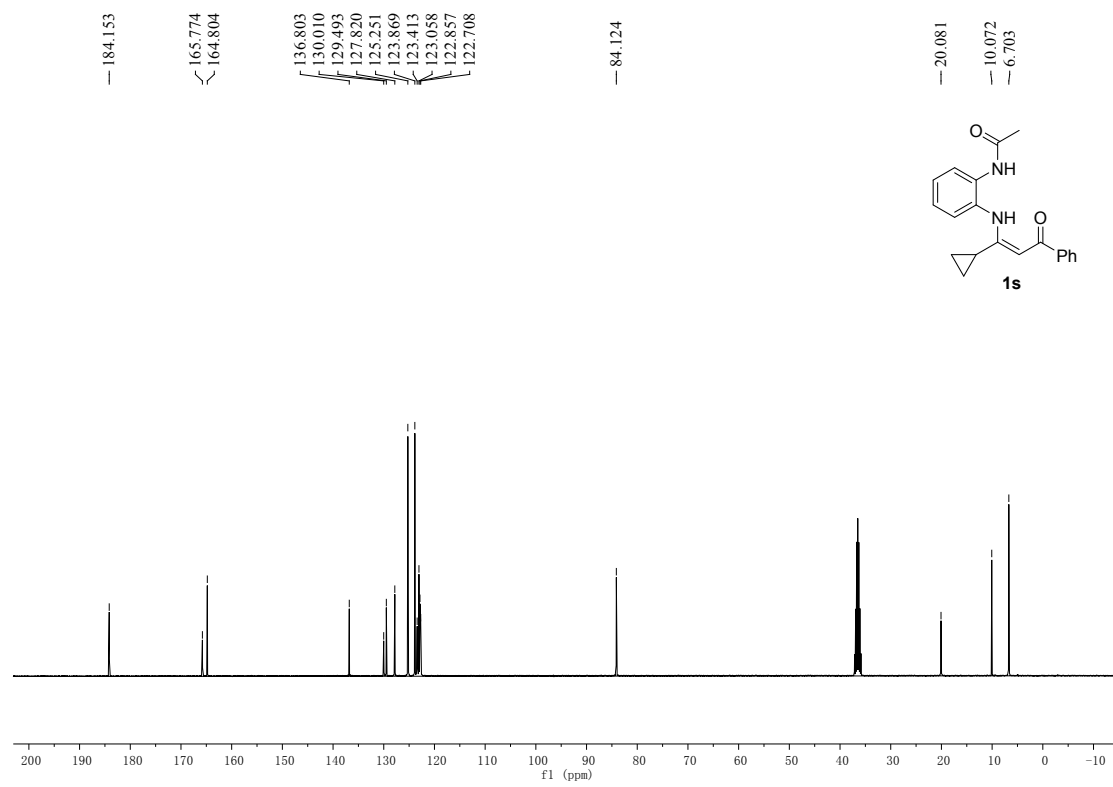

8.249  
8.246  
8.228  
8.226  
8.173  
8.171  
8.153  
8.150  
7.958  
7.939  
7.887  
7.869  
7.850  
7.829  
7.810  
7.792  
7.710  
7.702  
7.699  
7.693  
7.621  
7.603  
7.584  
7.481  
7.462  
7.443  
7.389  
7.382  
7.373  
7.348

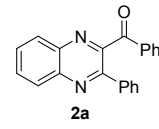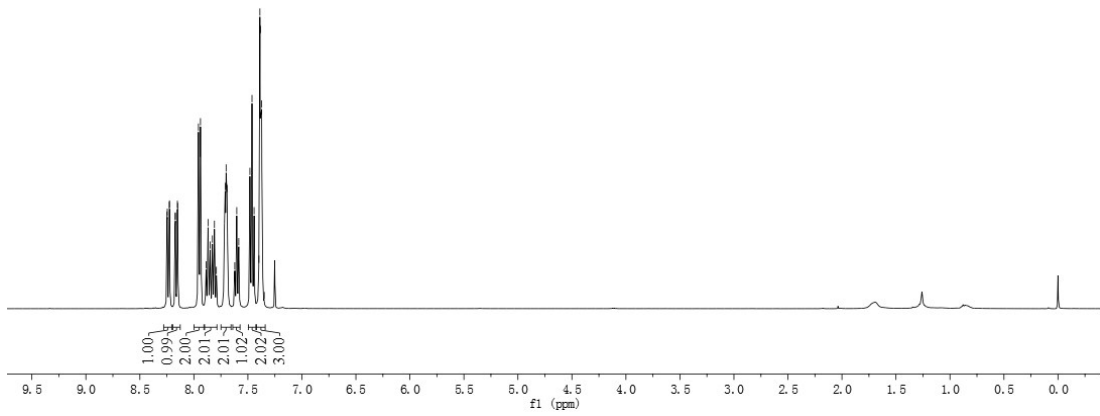

193.926

152.739  
151.235  
142.072  
139.571  
137.207  
135.545  
134.008  
131.368  
130.462  
130.402  
129.547  
129.380  
129.054  
128.654

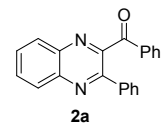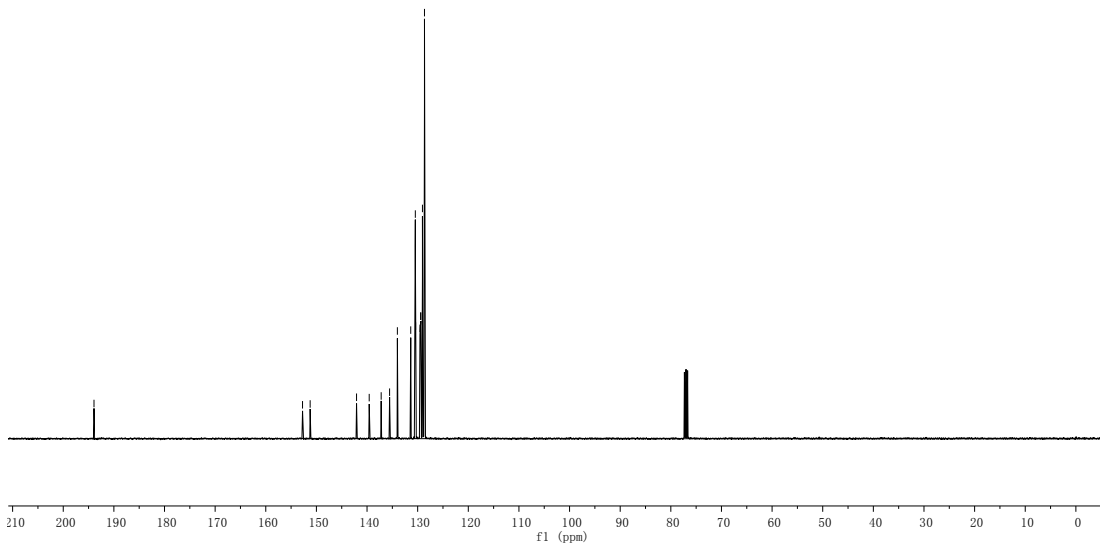

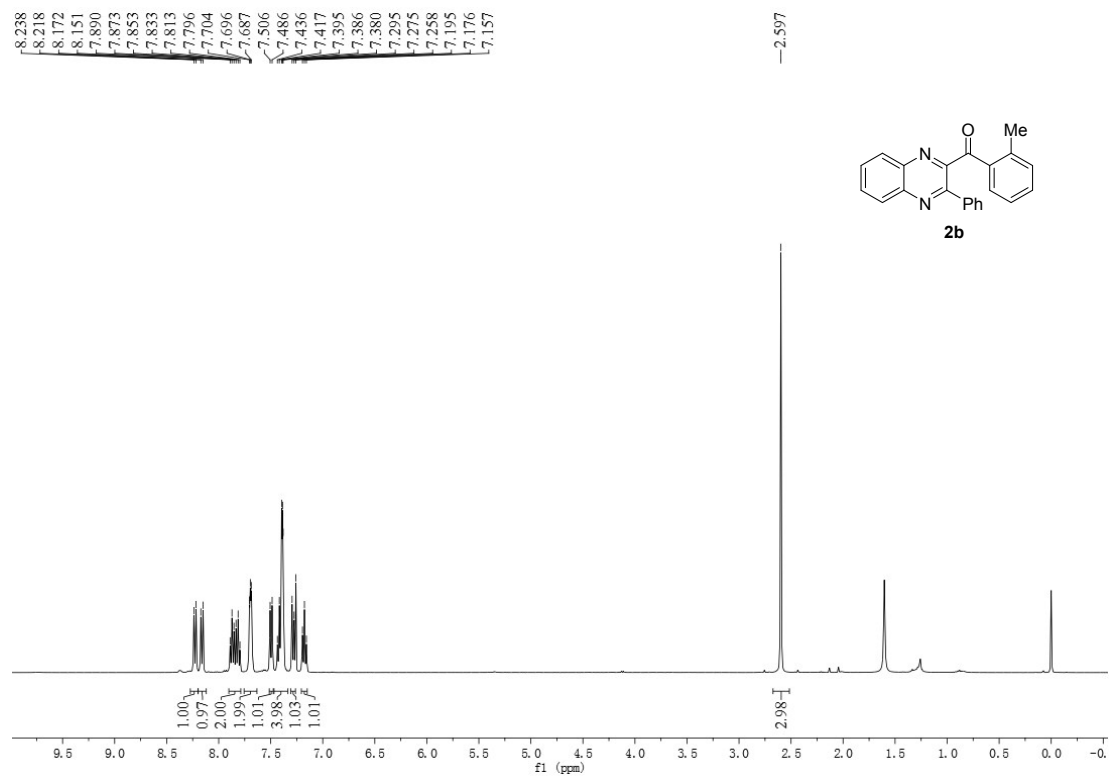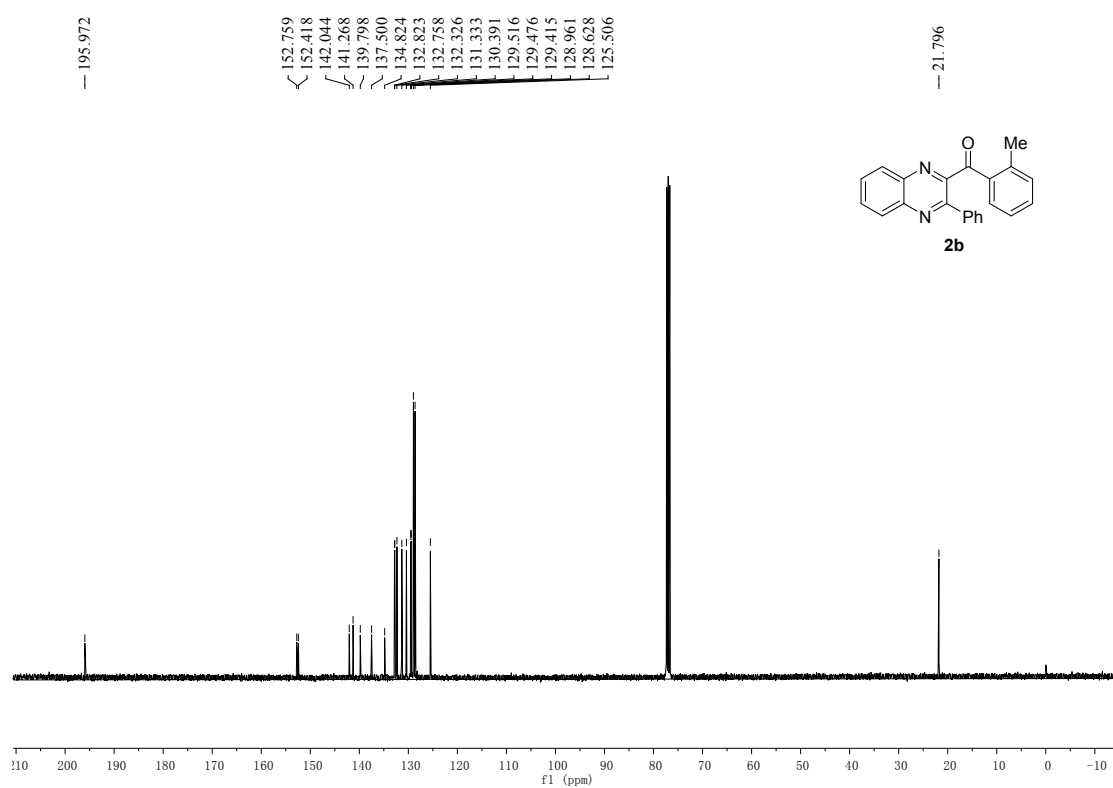

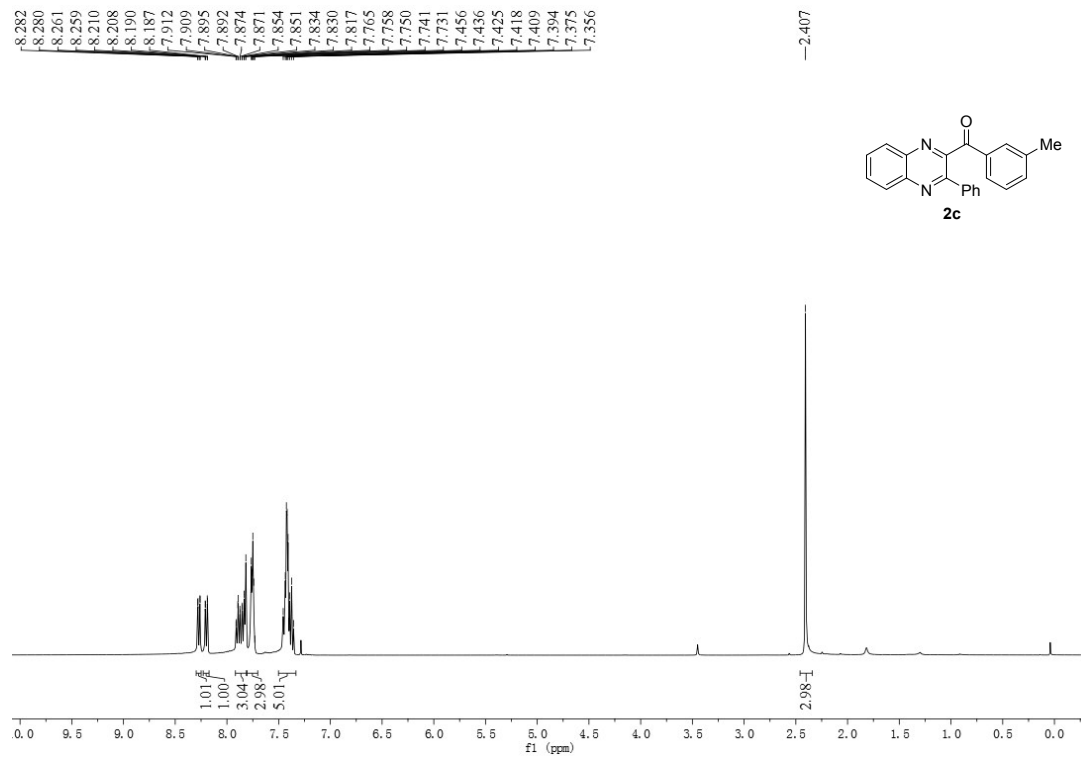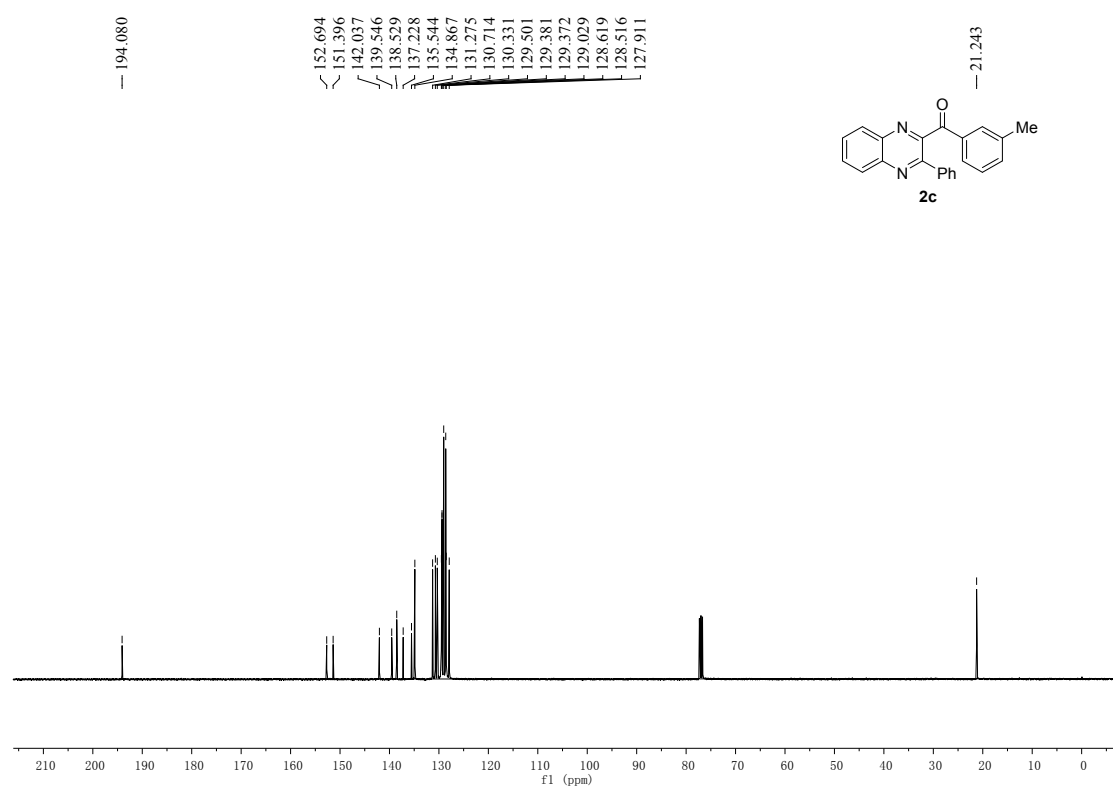

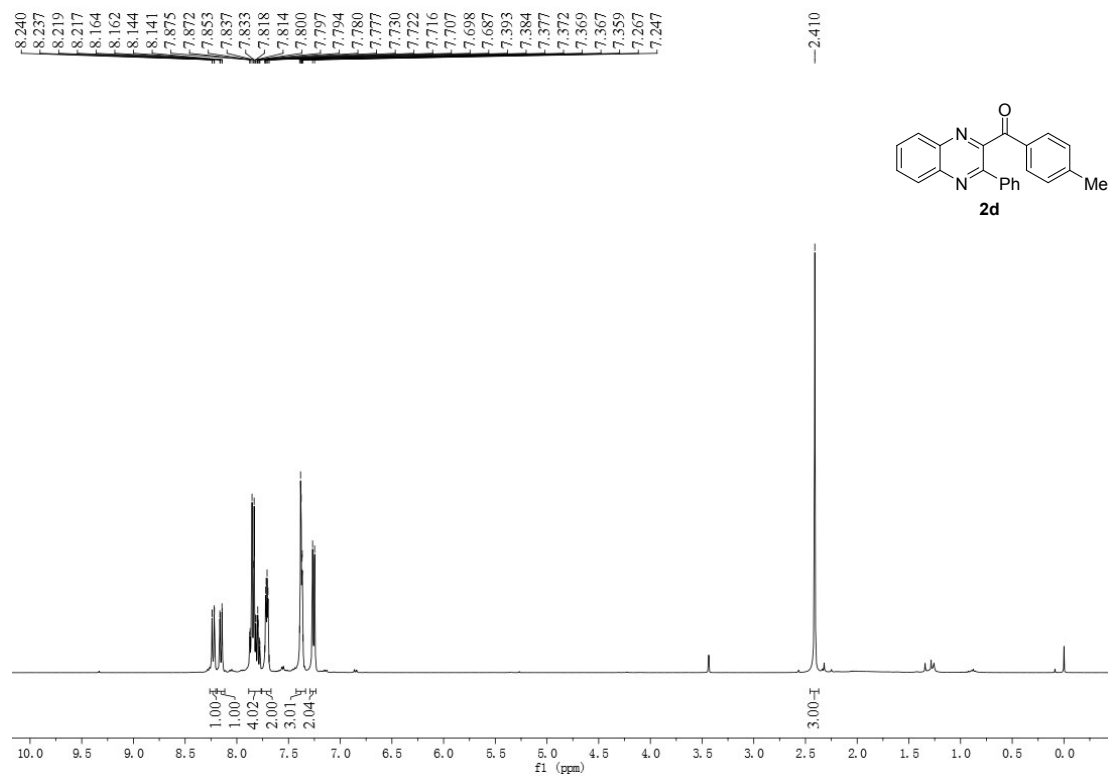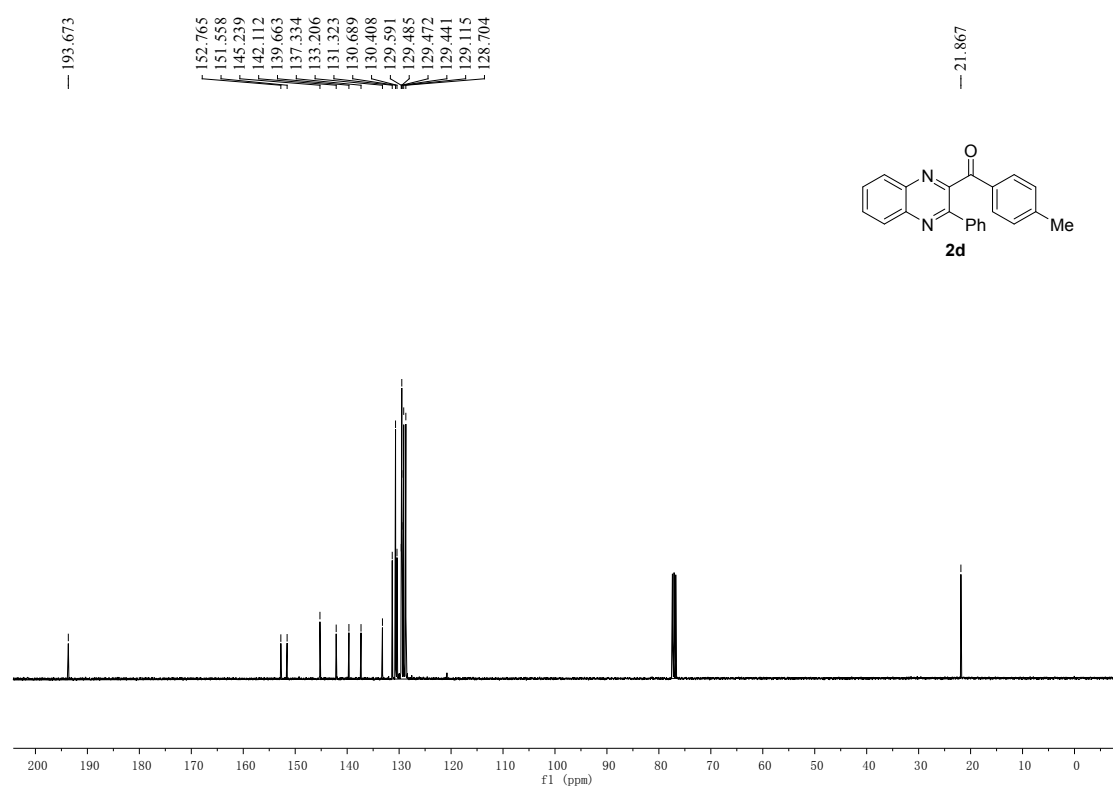



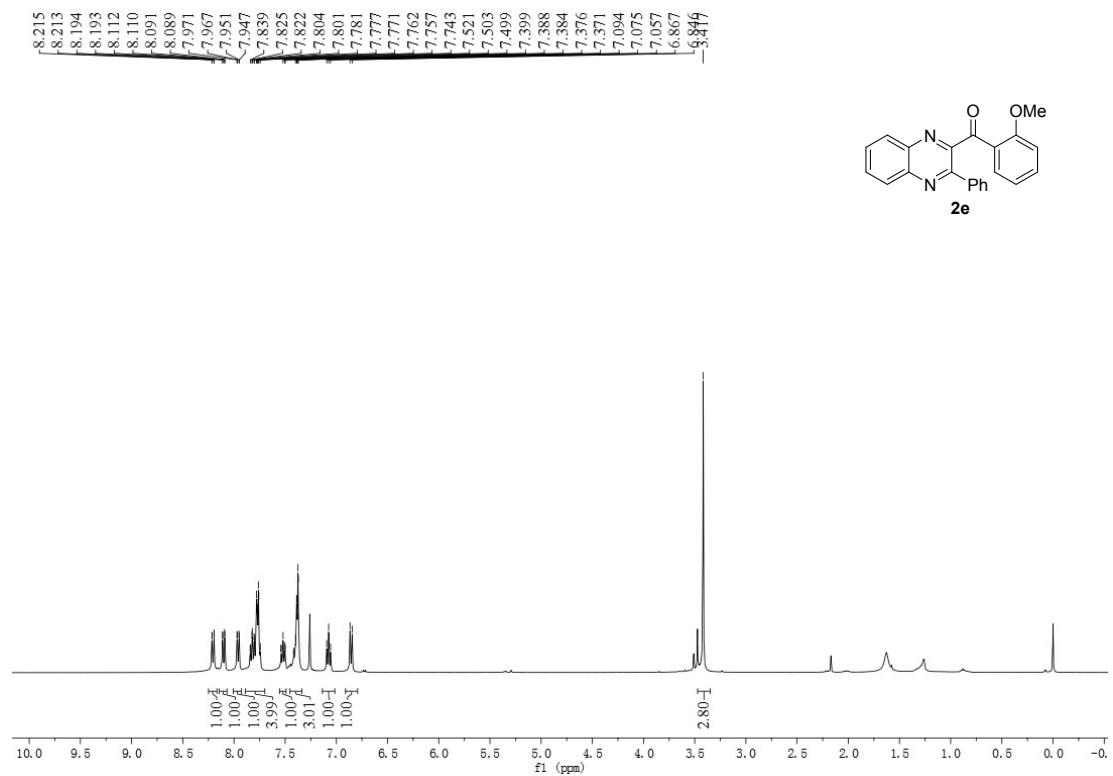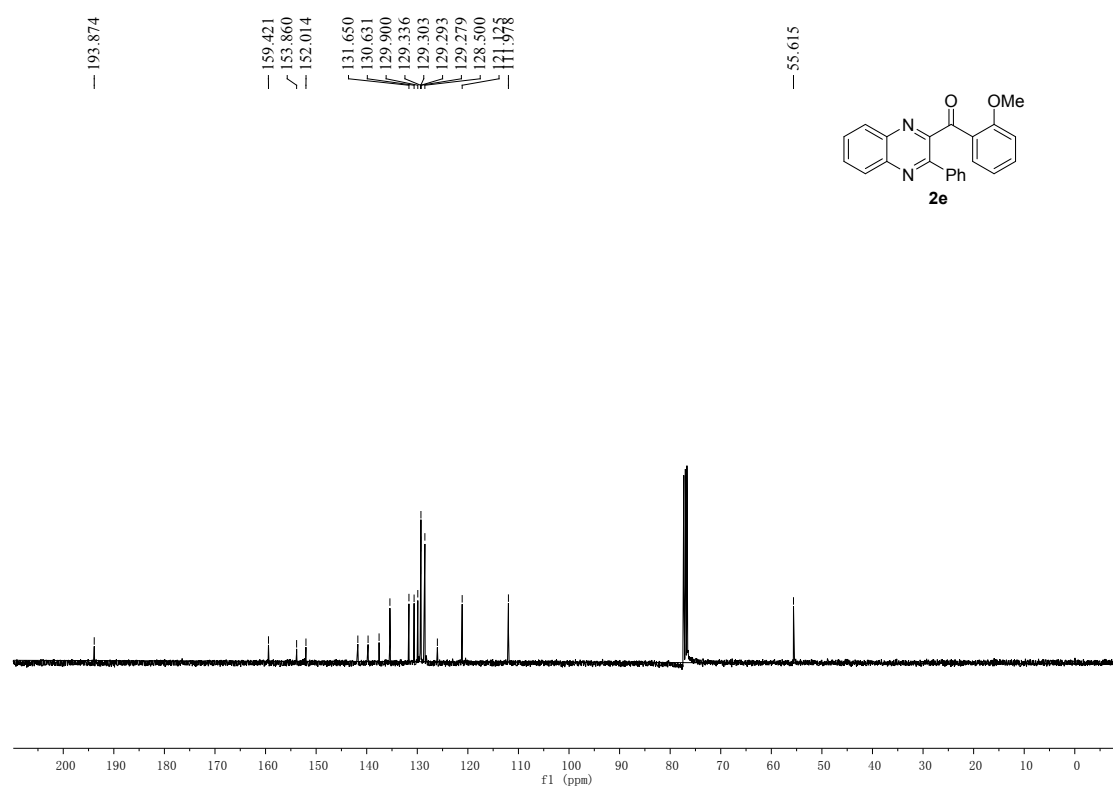

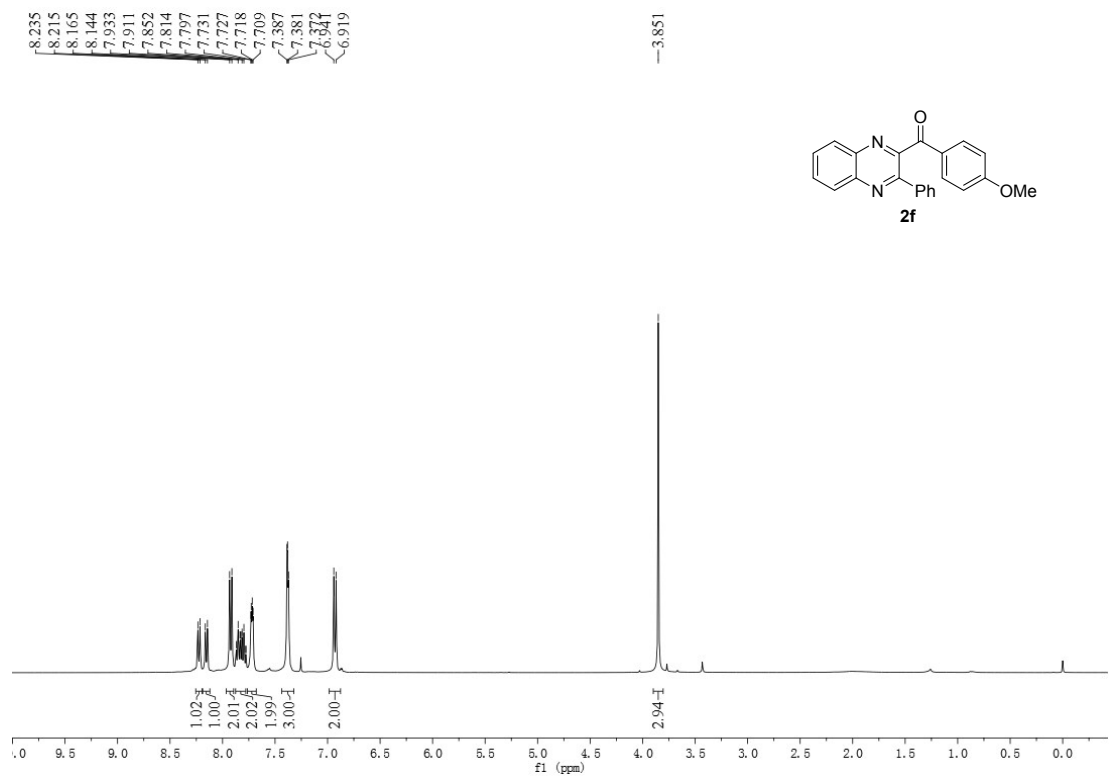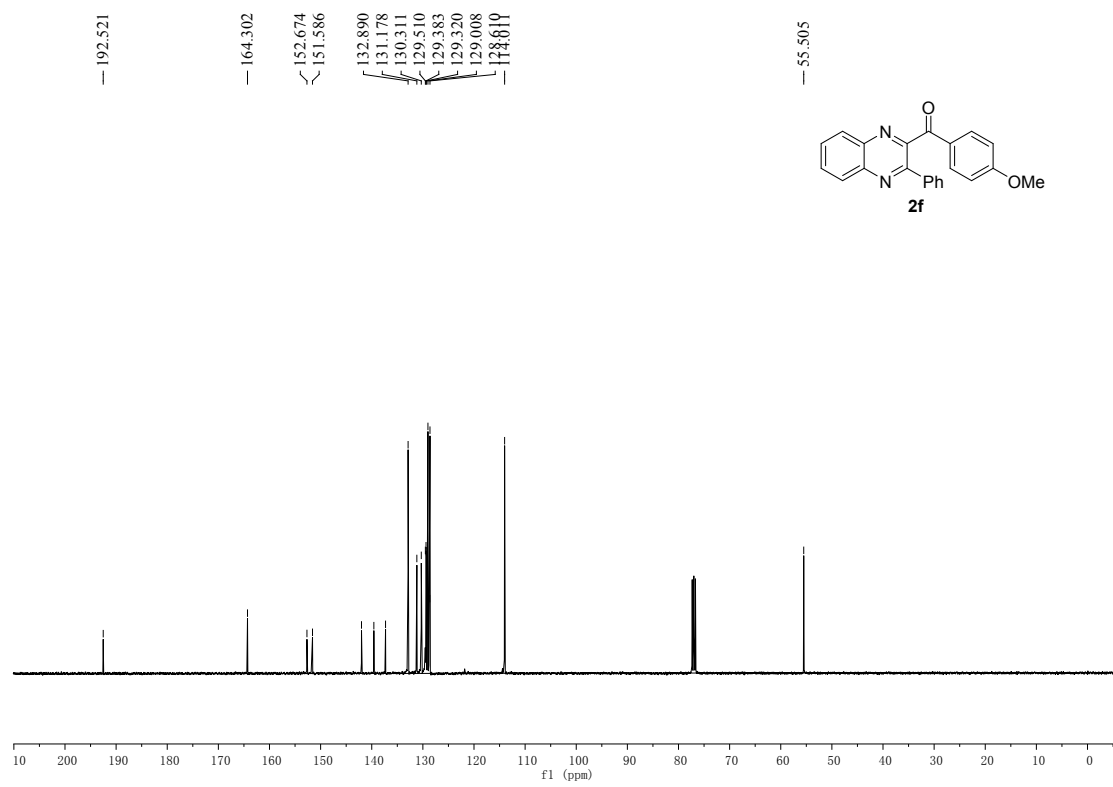

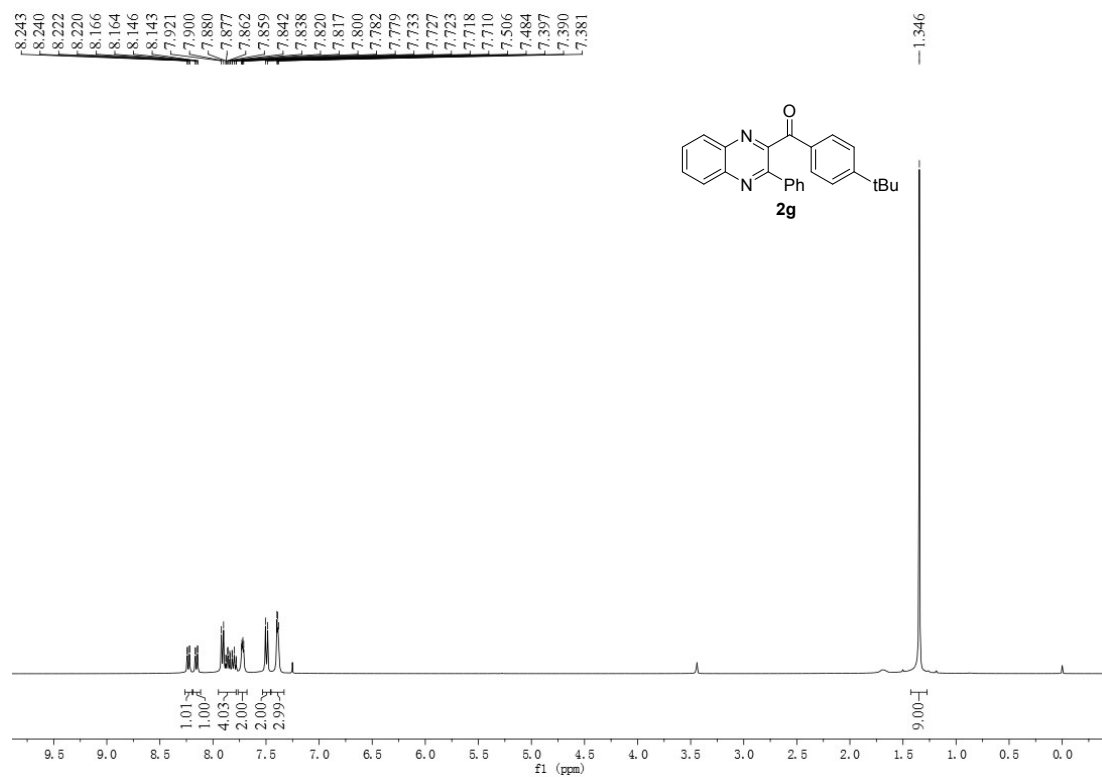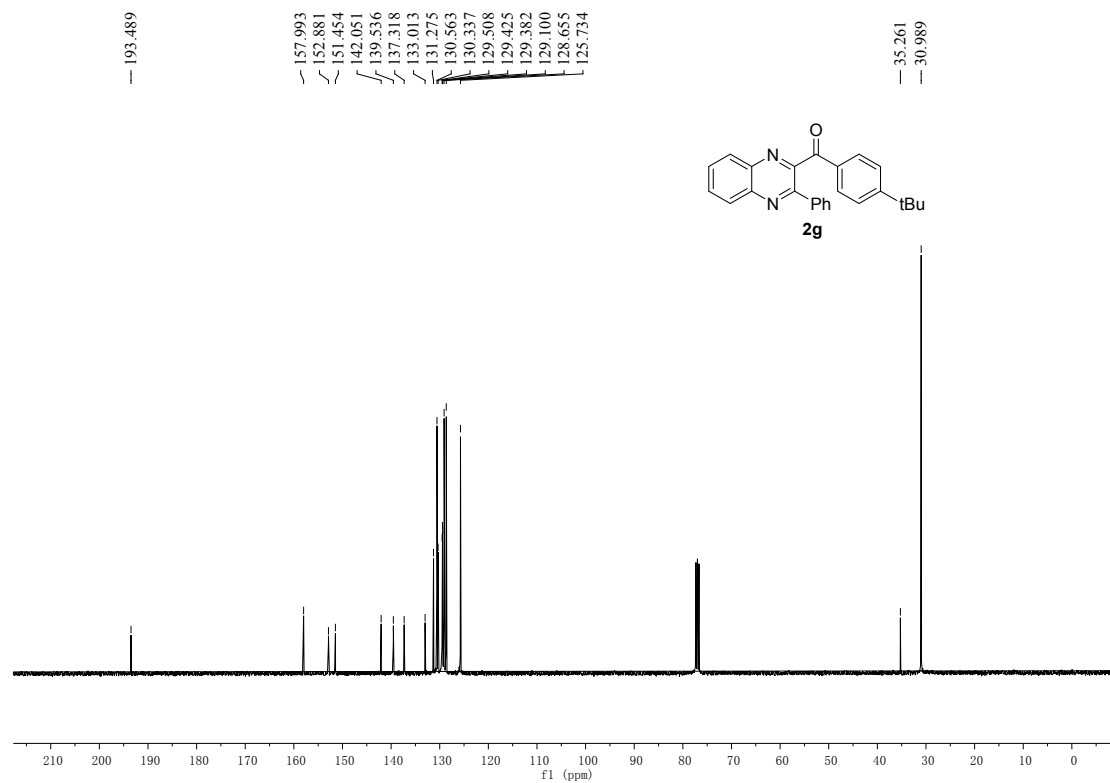

8.263  
8.244  
8.167  
8.148  
8.146  
8.105  
8.085  
7.931  
7.927  
7.913  
7.910  
7.893  
7.889  
7.866  
7.862  
7.845  
7.828  
7.825  
7.760  
7.739  
7.678  
7.673  
7.664  
7.654  
7.420  
7.415  
7.407  
7.403  
7.393  
7.380

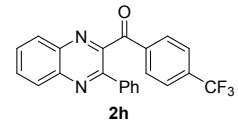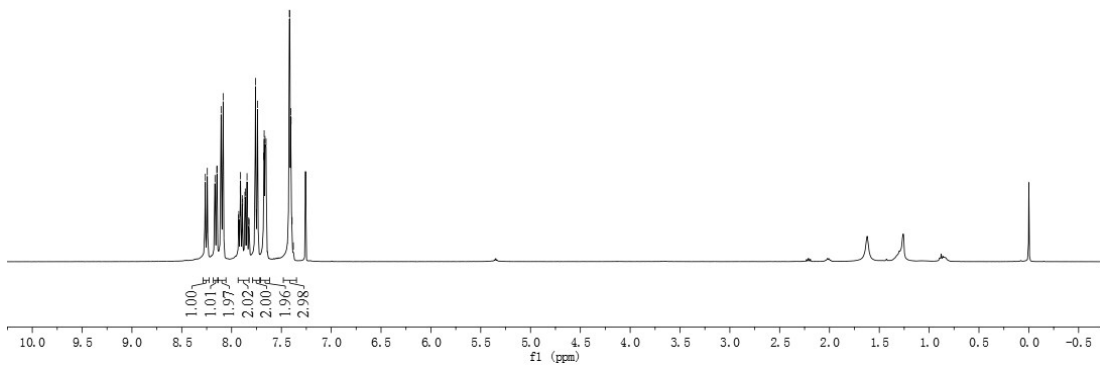

192.753  
152.950  
150.248  
142.261  
139.517  
138.289  
137.073  
135.545  
135.220  
134.894  
134.568  
131.835  
130.802  
130.682  
129.537  
129.463  
129.078  
128.821  
127.546  
125.778  
125.742  
125.705  
125.668  
124.834  
122.121  
119.409

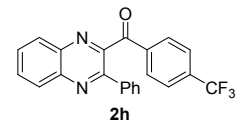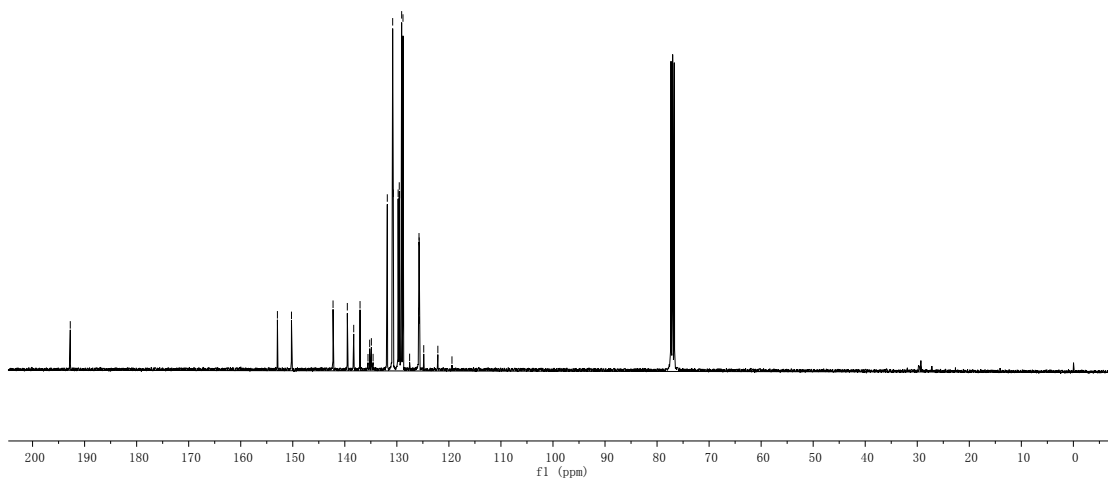

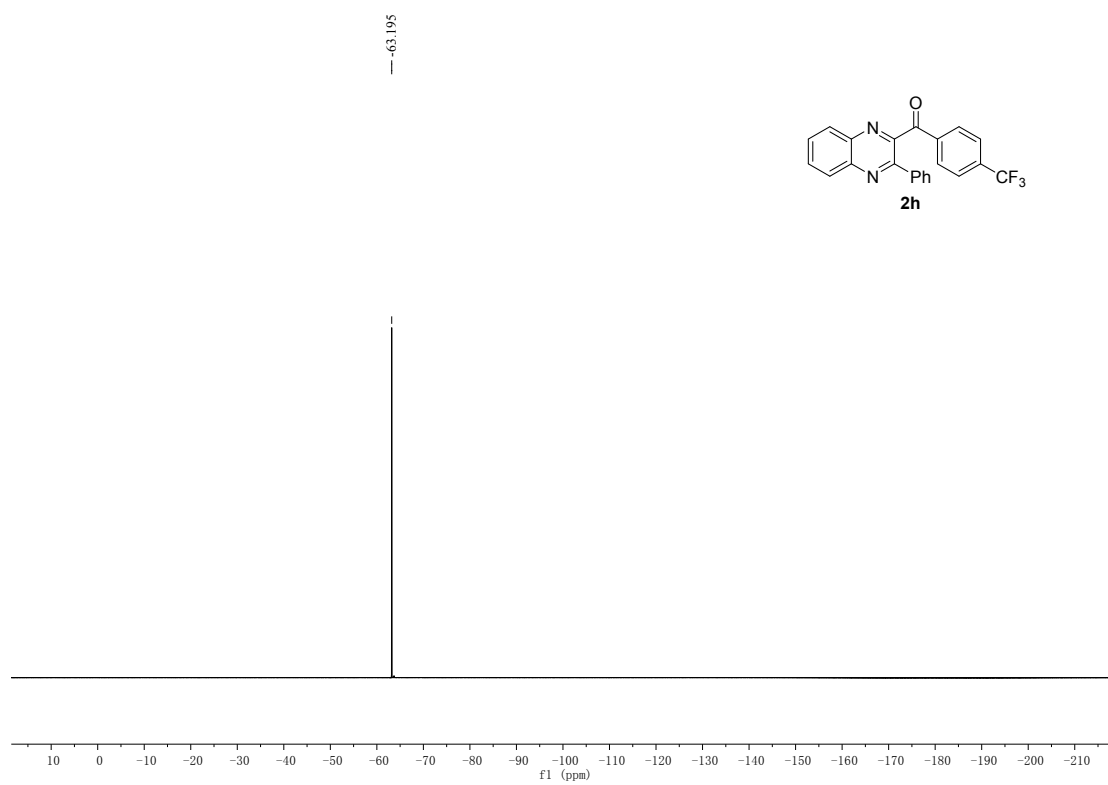

8.250  
8.247  
8.228  
8.226  
8.170  
8.167  
8.149  
8.146  
8.016  
8.009  
8.004  
7.996  
7.992  
7.987  
7.979  
7.974  
7.967  
7.903  
7.899  
7.885  
7.882  
7.865  
7.861  
7.845  
7.841  
7.824  
7.821  
7.807  
7.803  
7.705  
7.695  
7.690  
7.682  
7.671  
7.659  
7.404  
7.399  
7.391  
7.387  
7.378  
7.364  
7.169  
7.163  
7.158  
7.141  
7.124  
7.120  
7.113

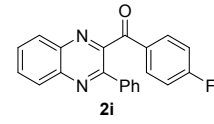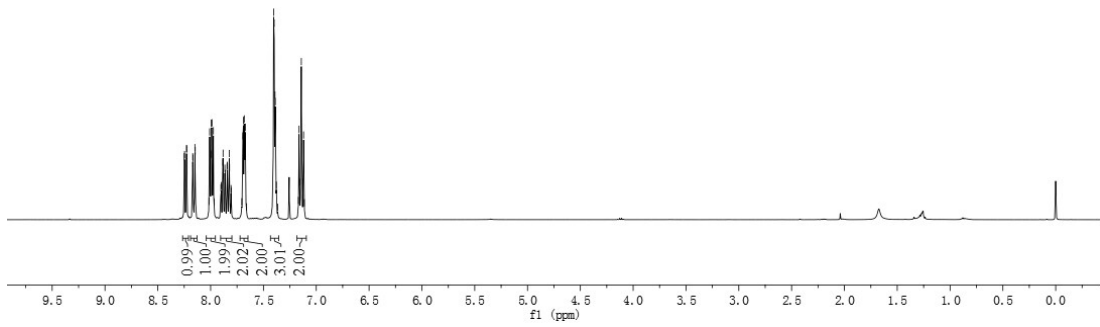

192.342  
167.537  
164.981  
152.754  
150.849  
131.519  
130.516  
129.636  
129.457  
129.373  
129.025  
118.081  
115.861

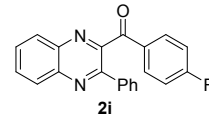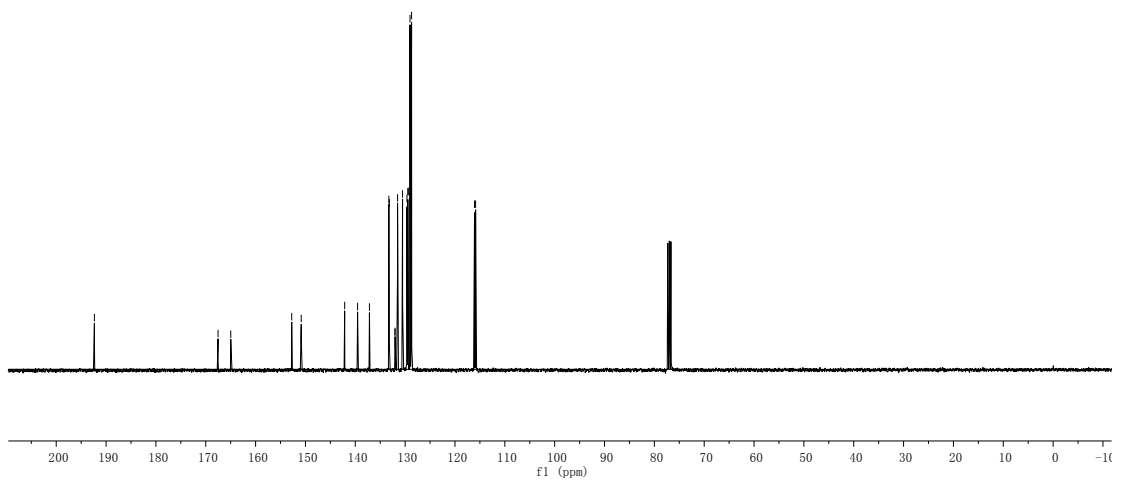

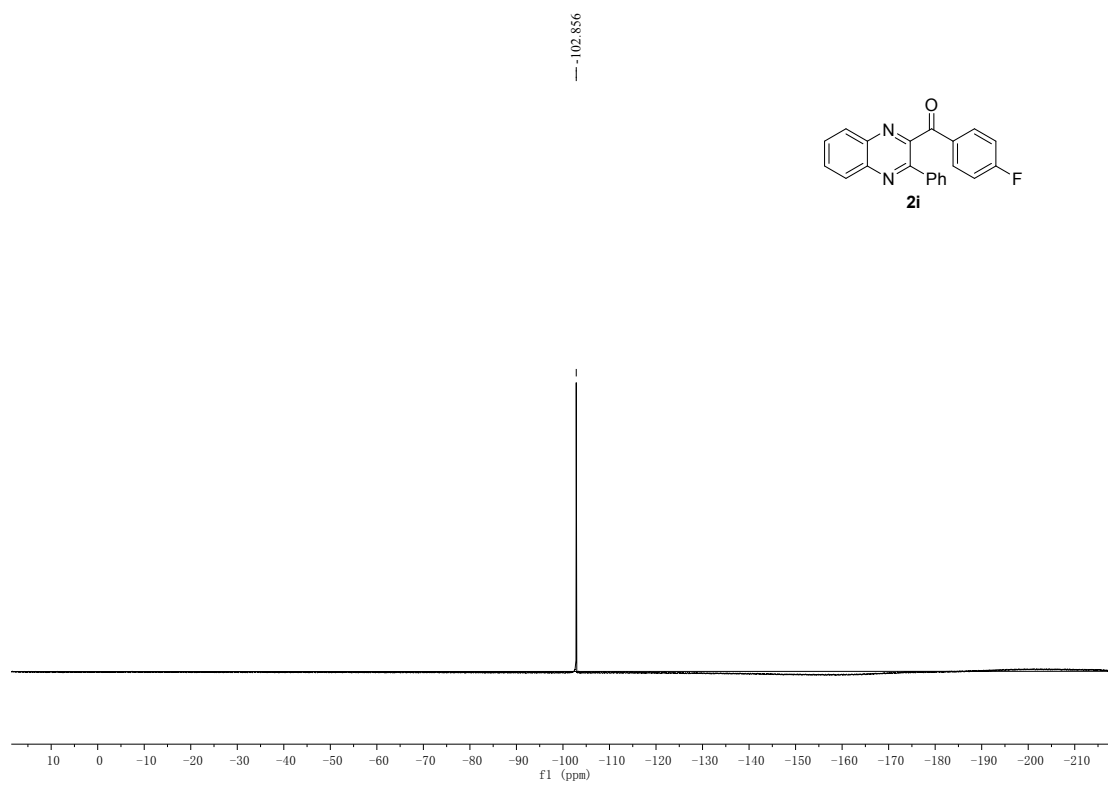

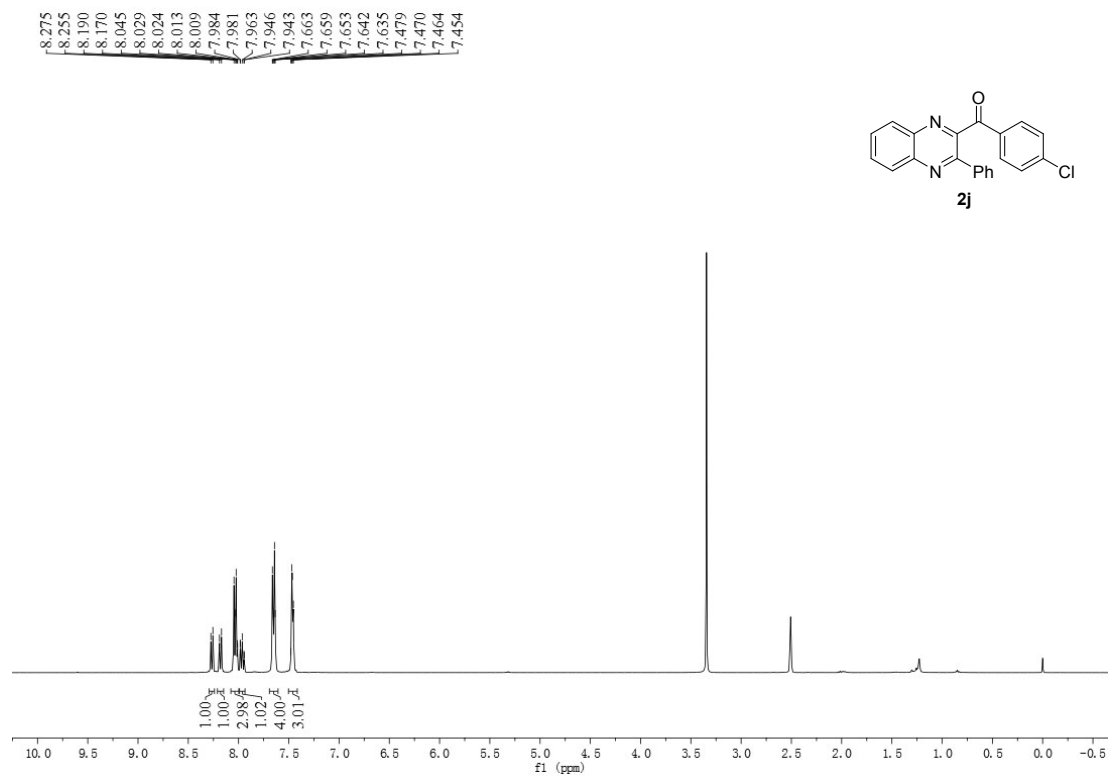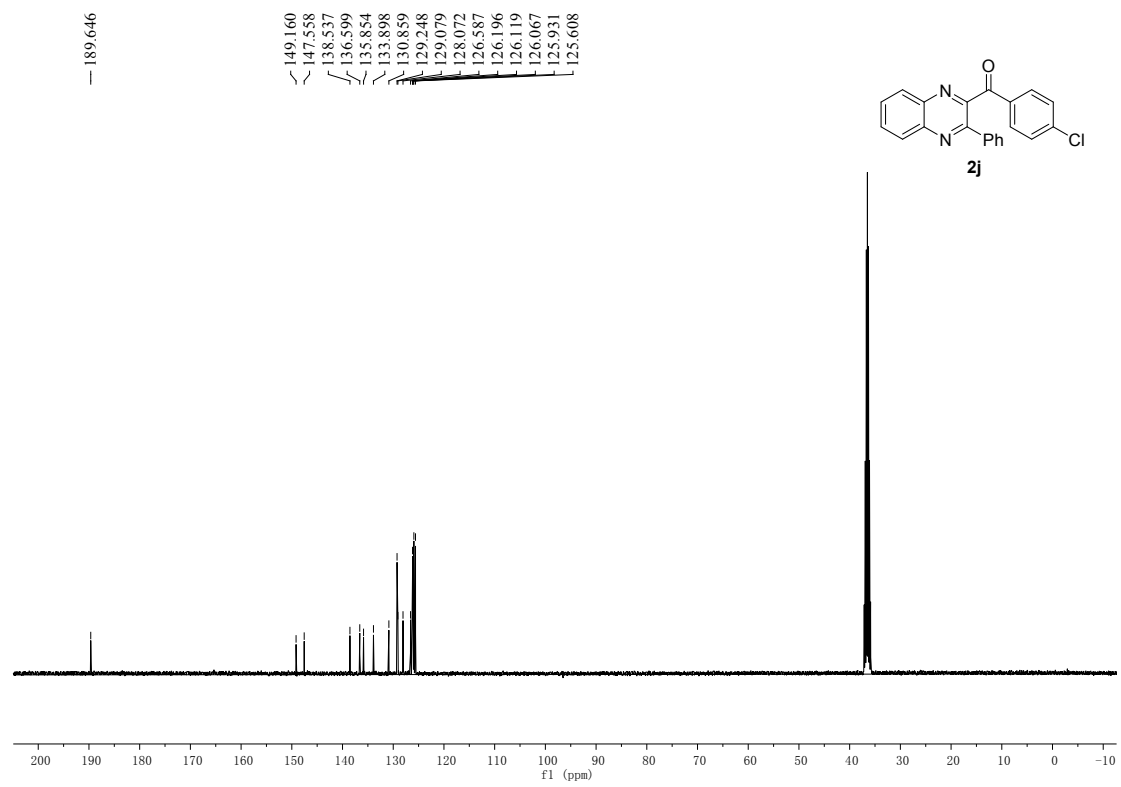



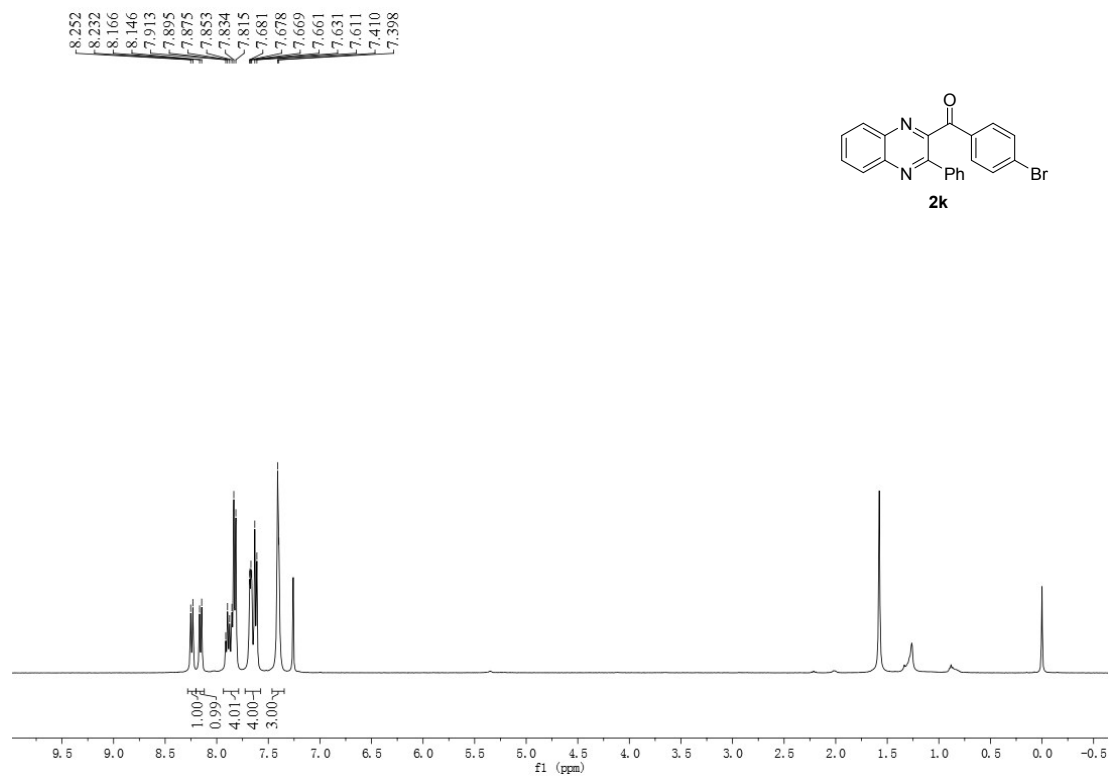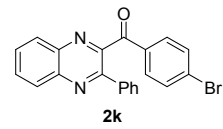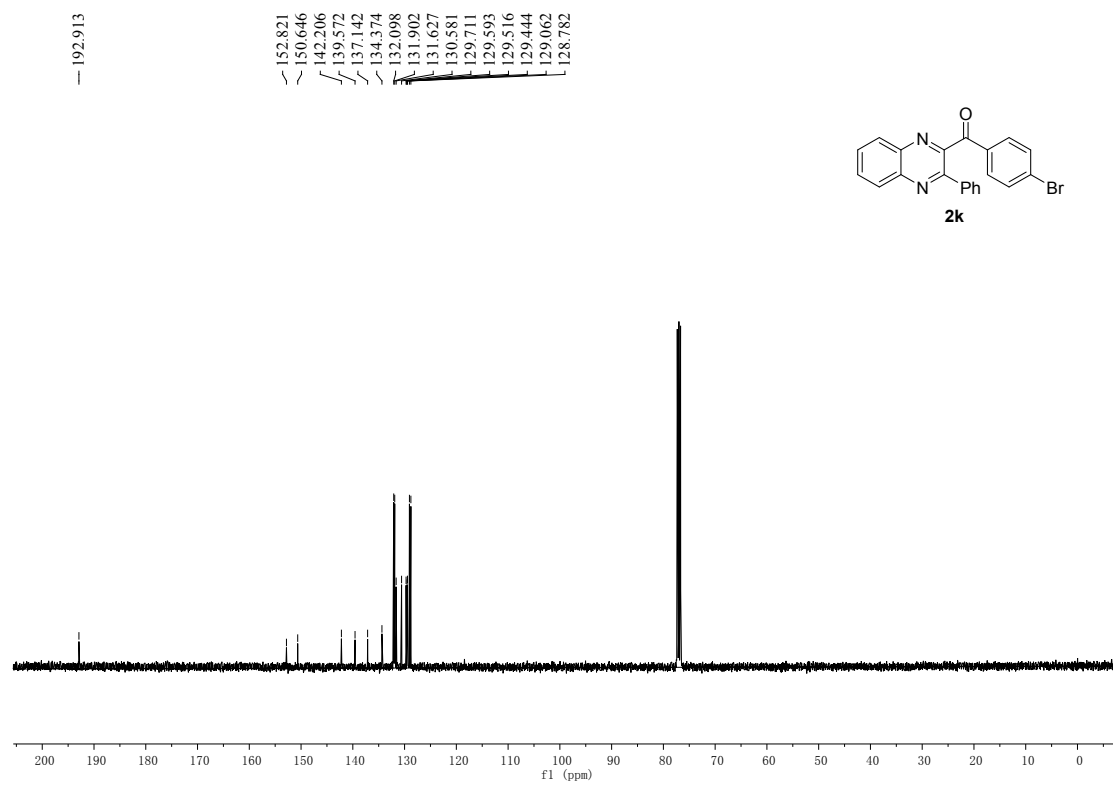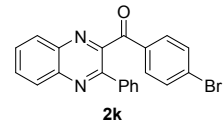

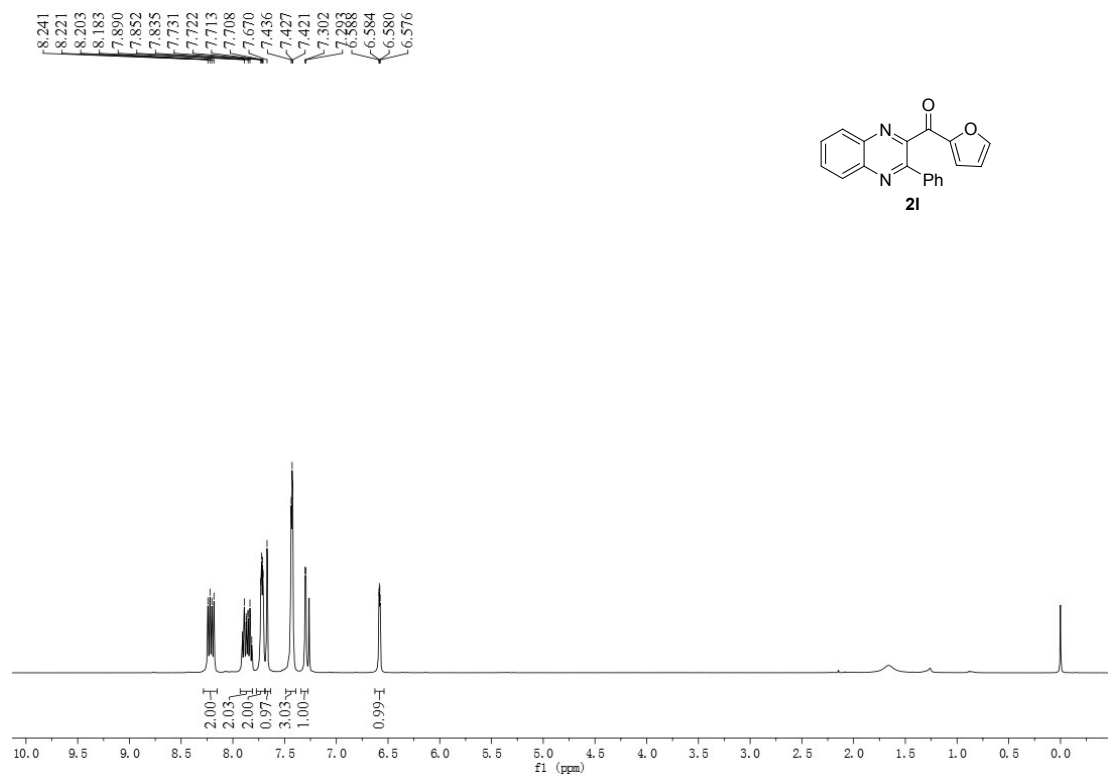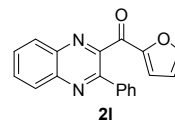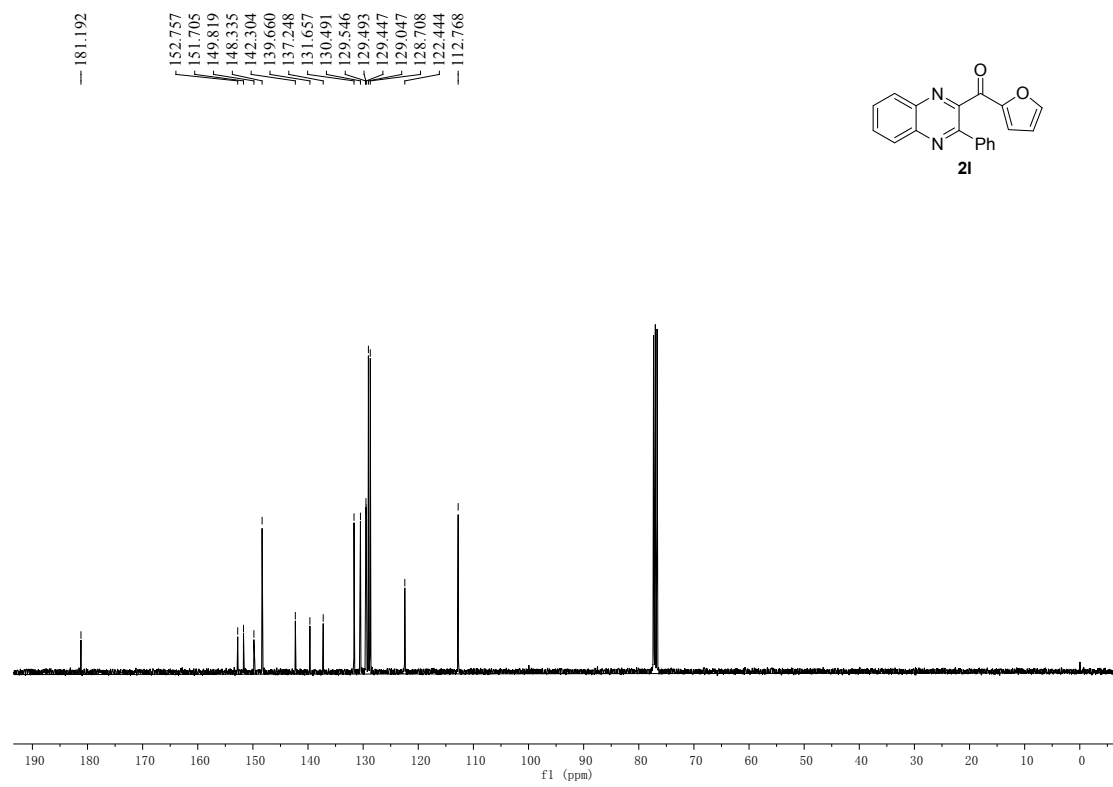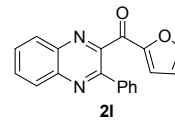

8.240  
8.219  
8.206  
8.185  
7.902  
7.884  
7.866  
7.848  
7.830  
7.812  
7.797  
7.784  
7.779  
7.769  
7.739  
7.732  
7.723  
7.717  
7.438  
7.430  
7.423  
7.178  
7.168  
7.157

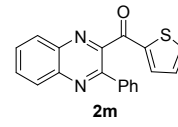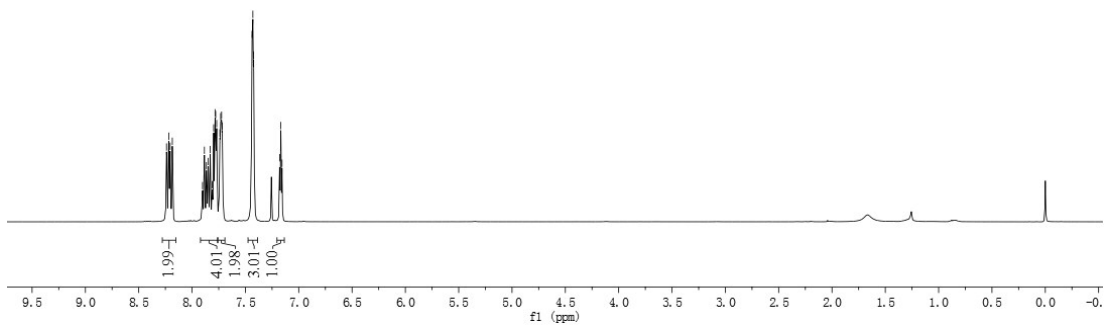

185.785  
152.830  
150.181  
142.460  
142.261  
139.434  
137.346  
136.442  
136.190  
131.639  
130.497  
129.556  
129.441  
129.021  
128.667  
128.459

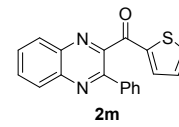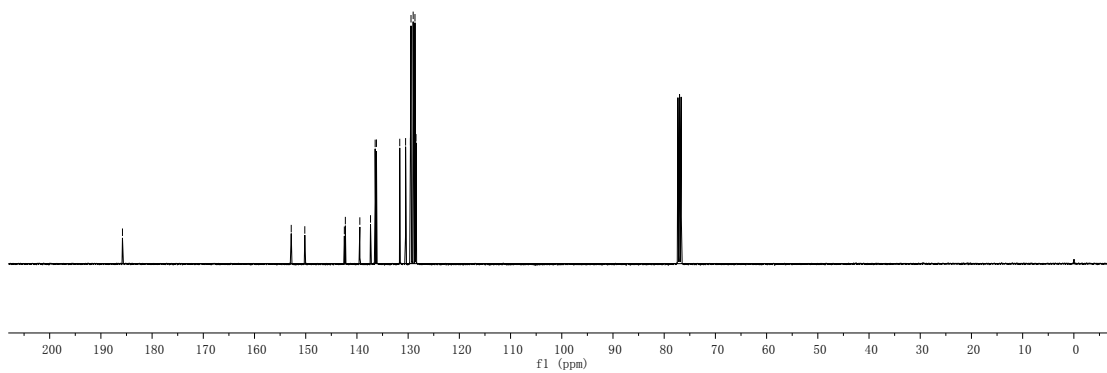

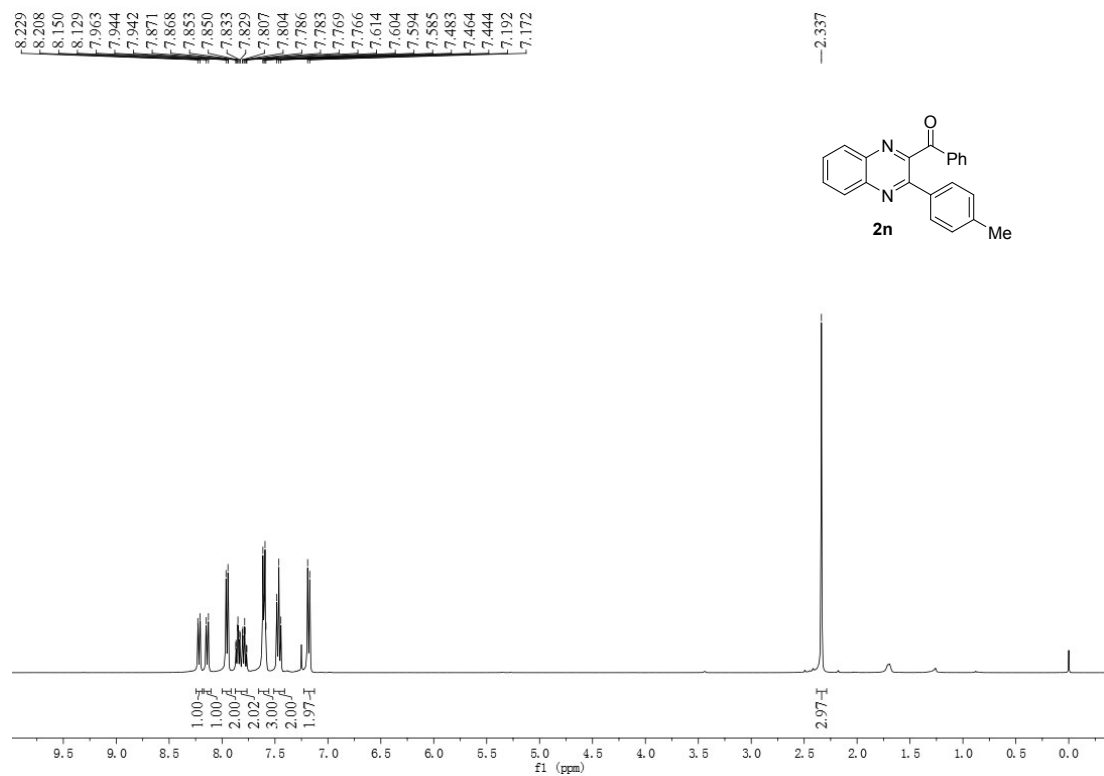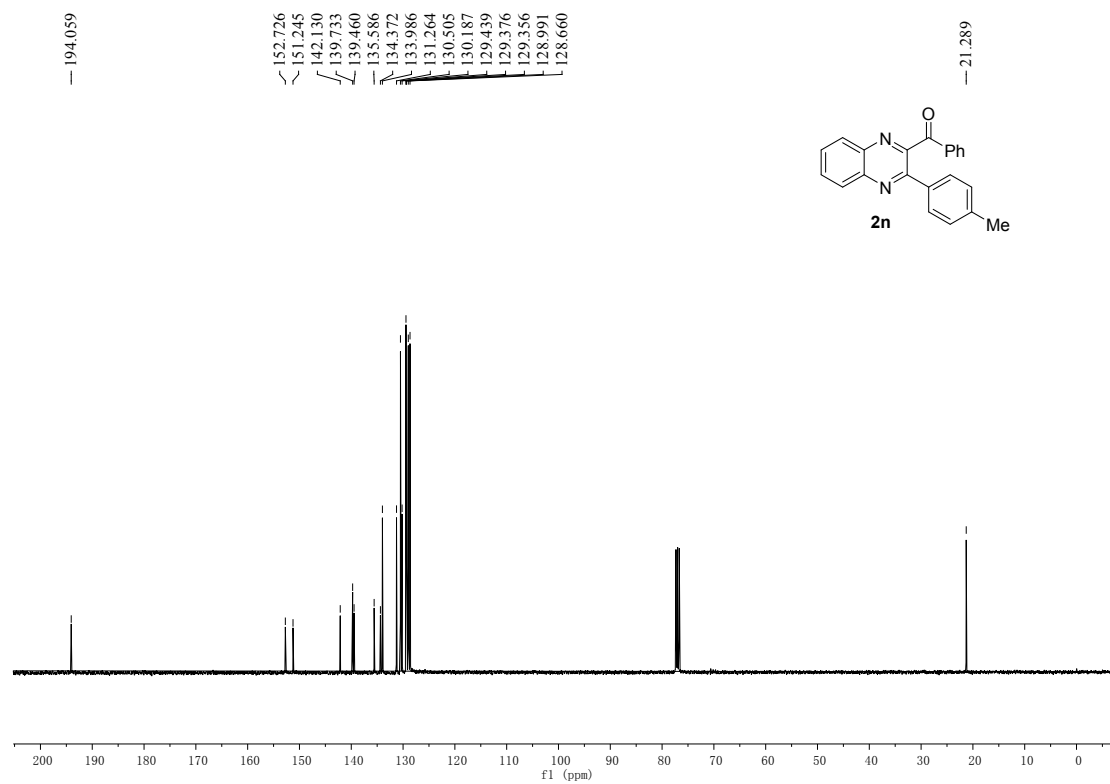

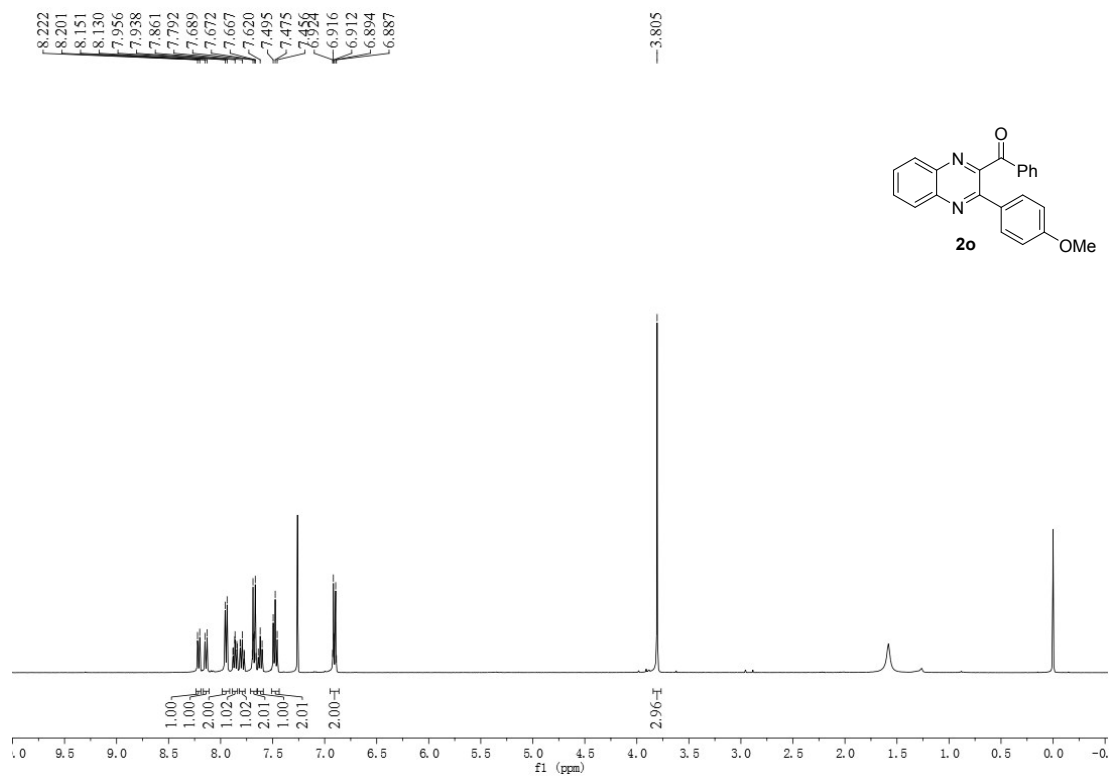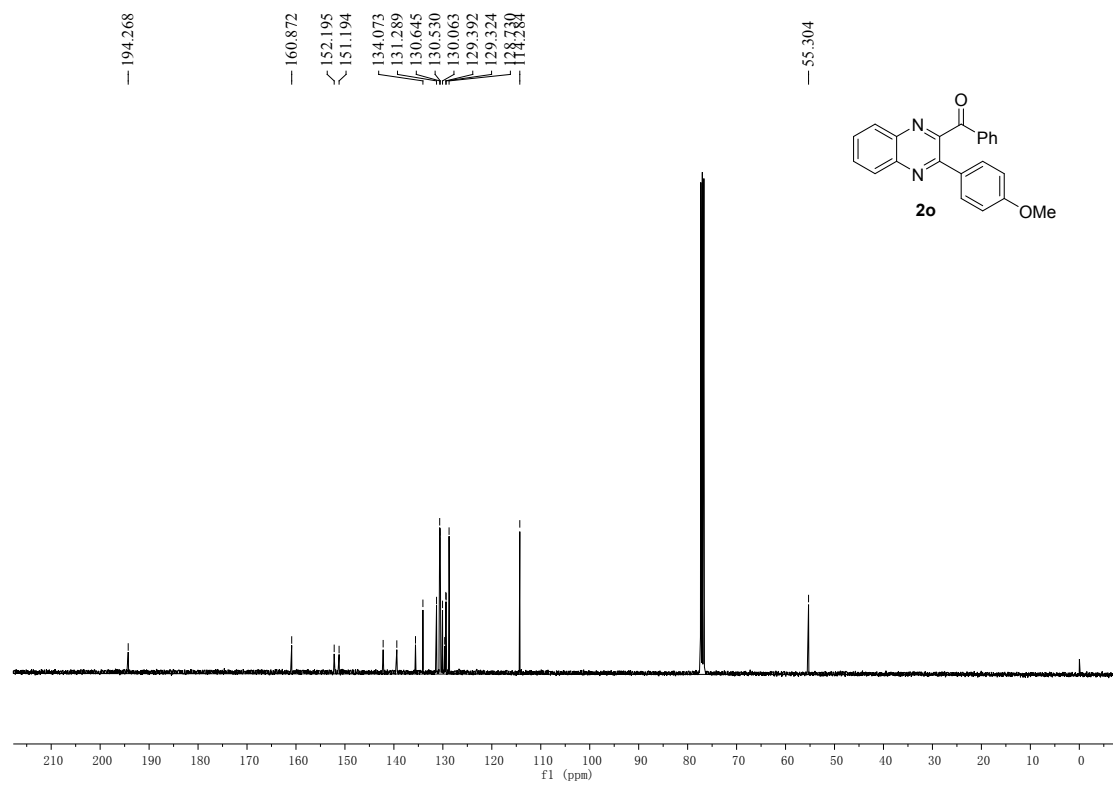

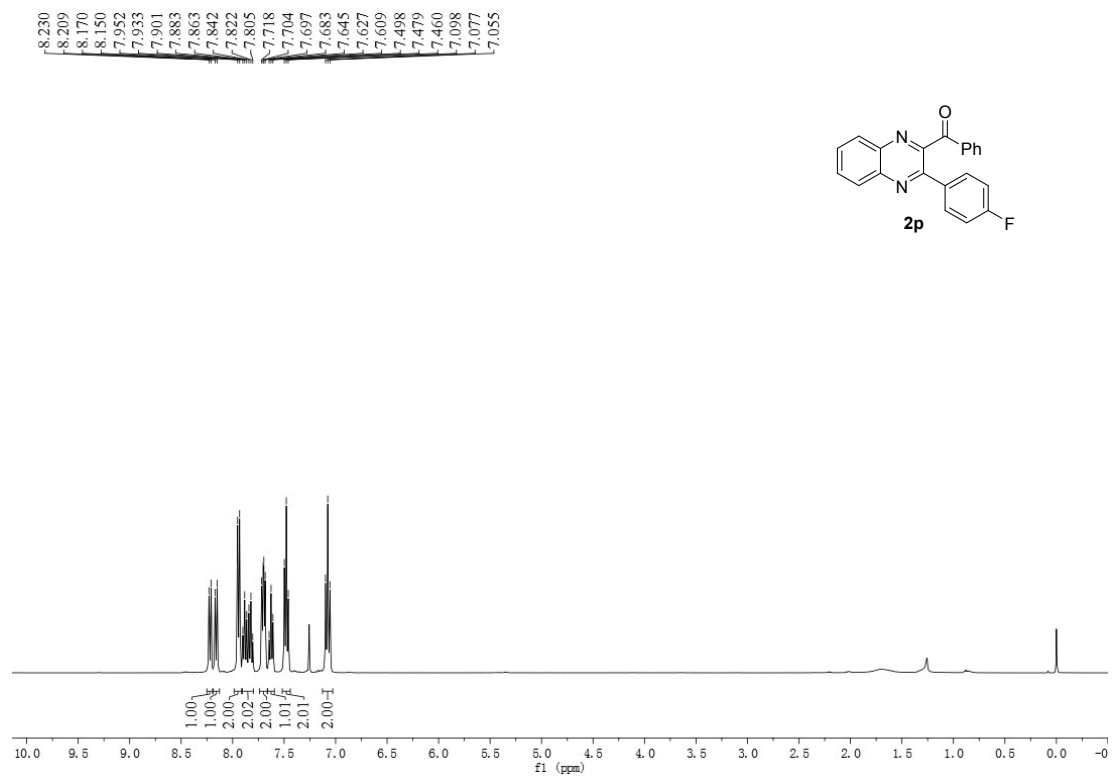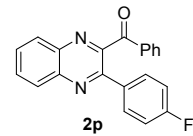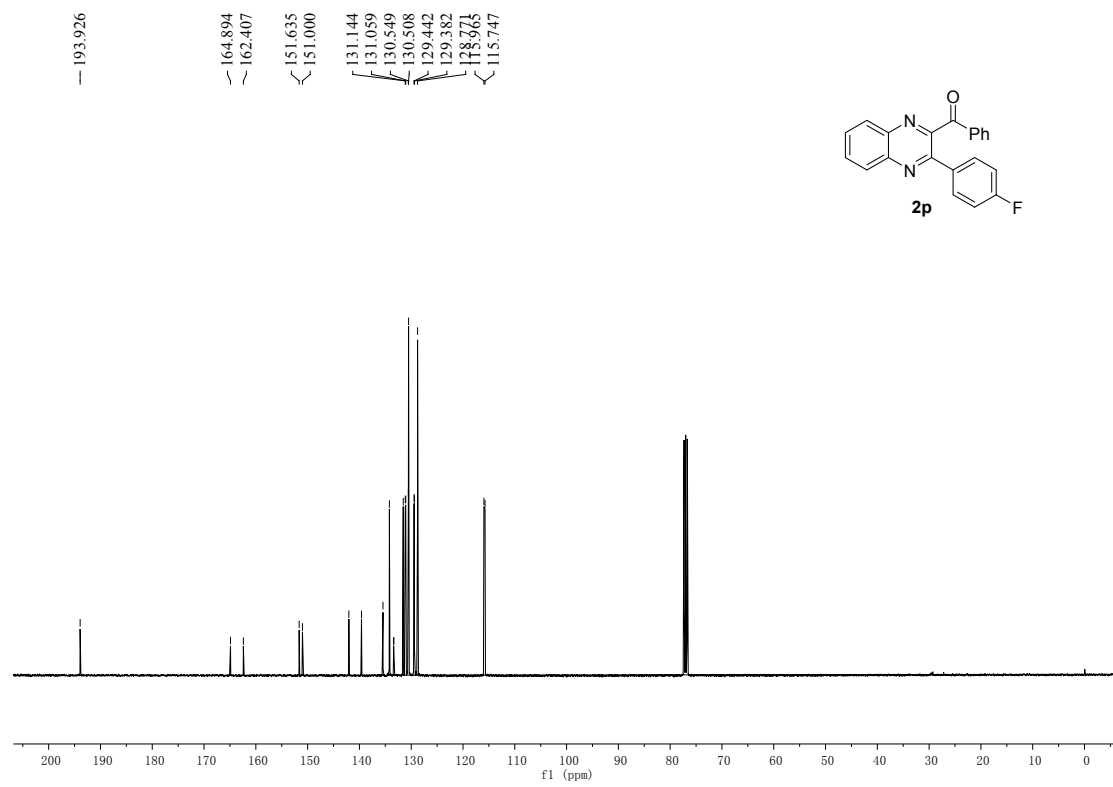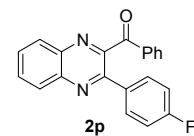

-111.132

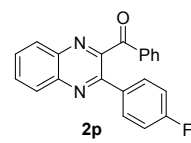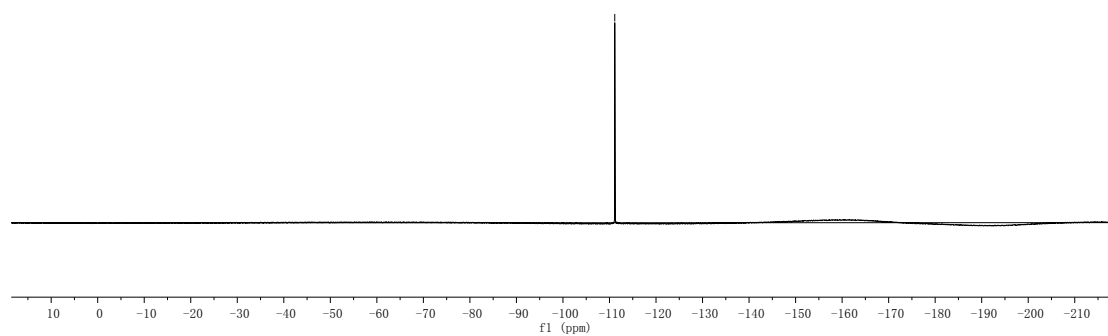

8.221  
8.200  
8.162  
8.160  
8.142  
8.139  
7.961  
7.943  
7.940  
7.891  
7.887  
7.873  
7.870  
7.853  
7.849  
7.834  
7.831  
7.814  
7.796  
7.793  
7.660  
7.639  
7.625  
7.606  
7.497  
7.477  
7.458  
7.367  
7.346

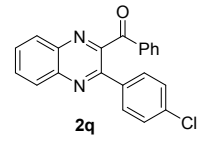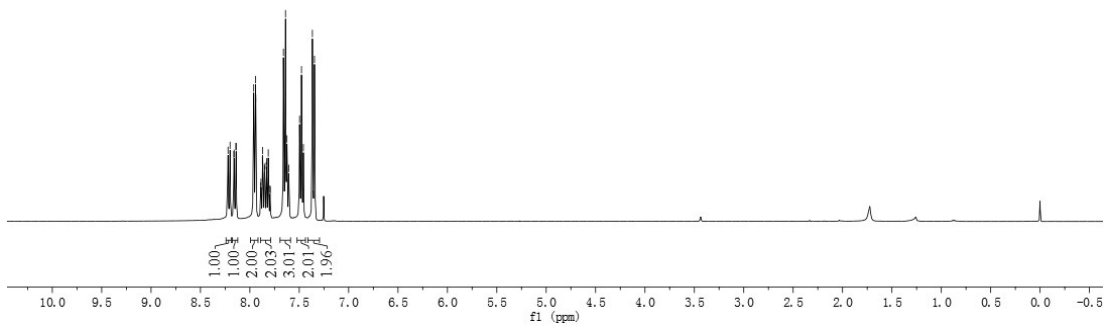

— 193.750

151.533  
150.894  
141.994  
139.586  
135.941  
135.674  
135.391  
134.222  
131.552  
130.642  
130.511  
130.387  
129.404  
129.383  
128.929  
128.761

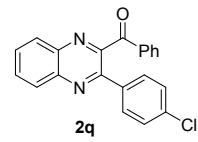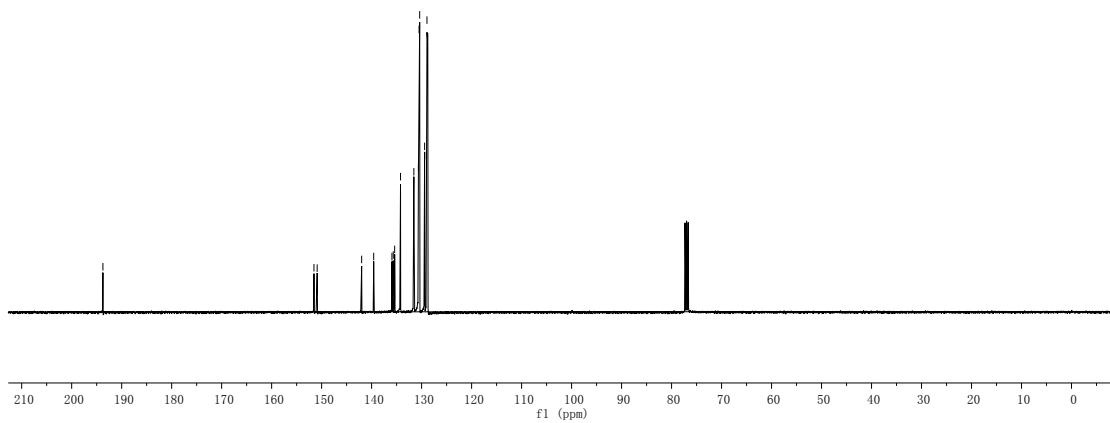



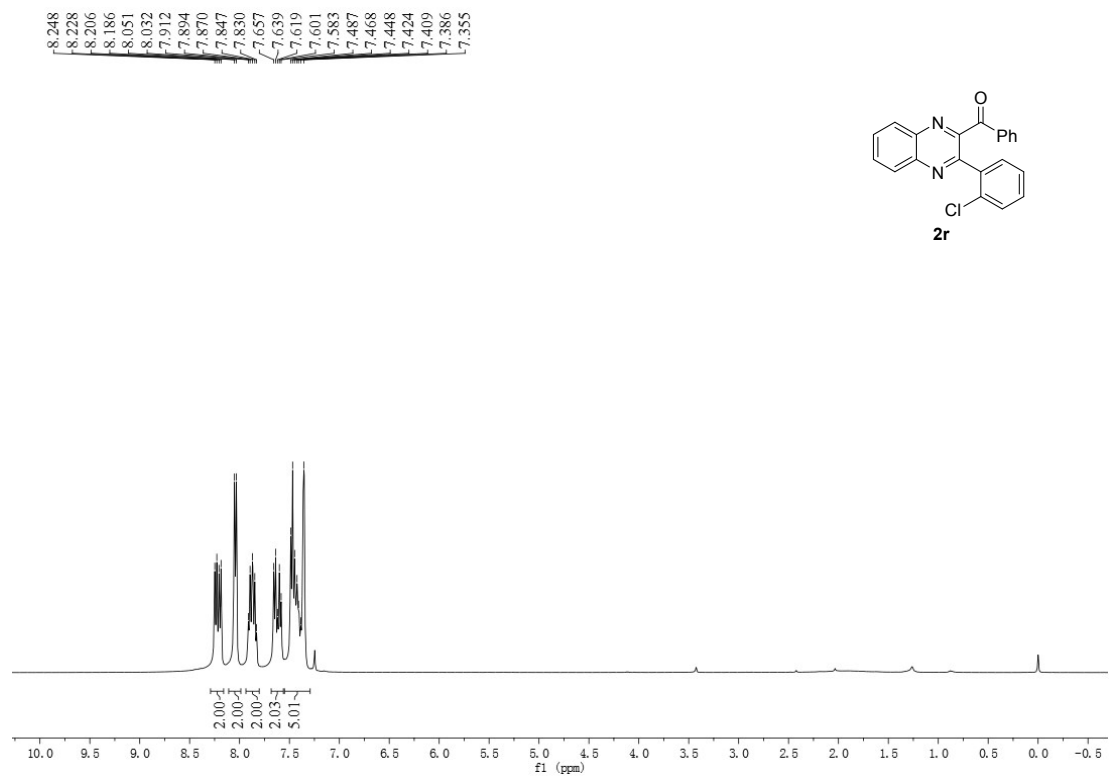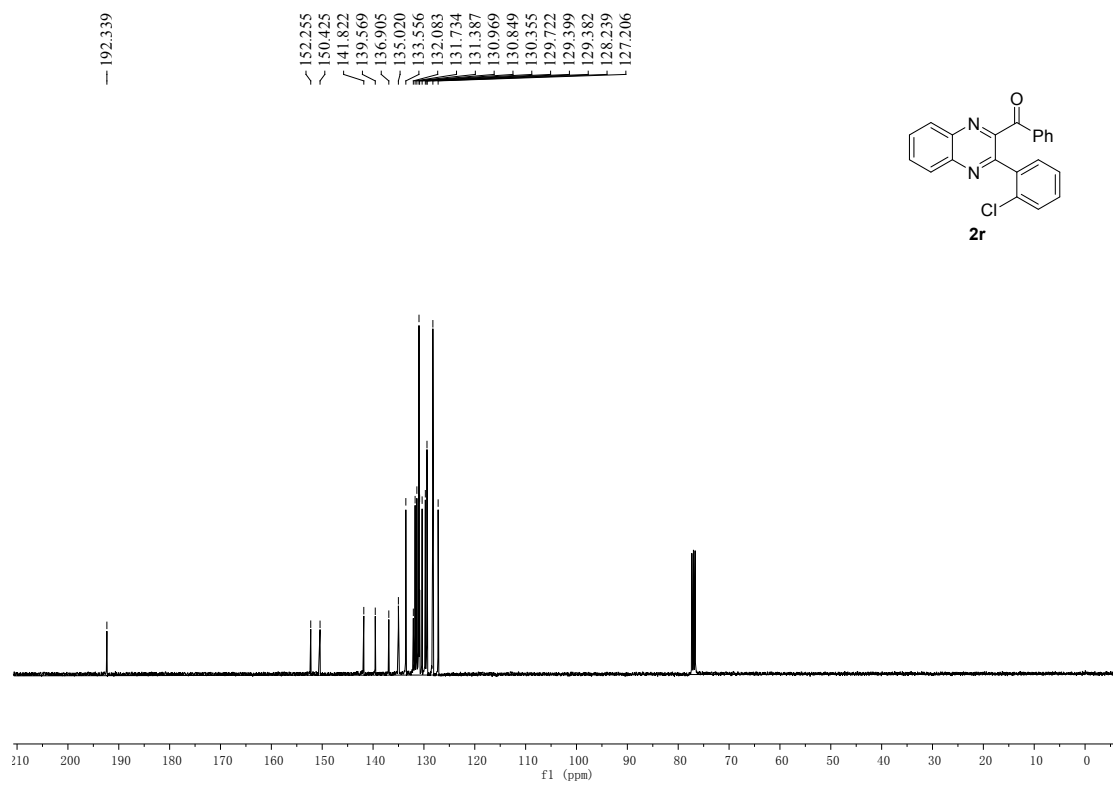

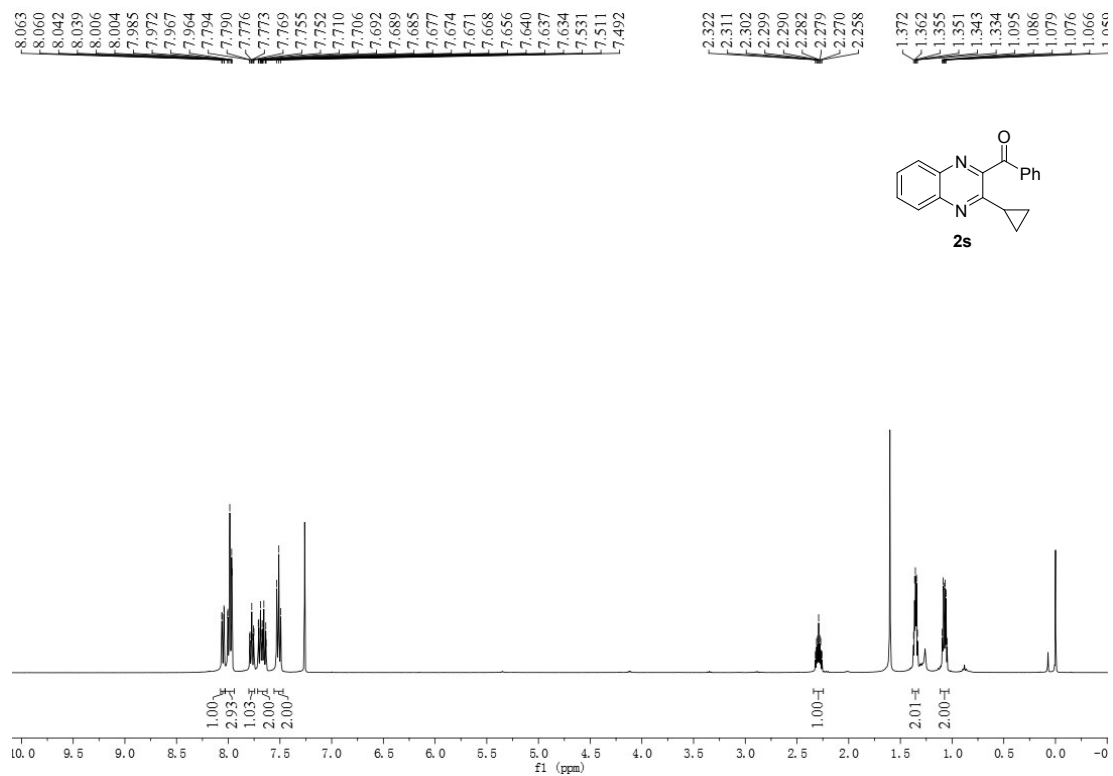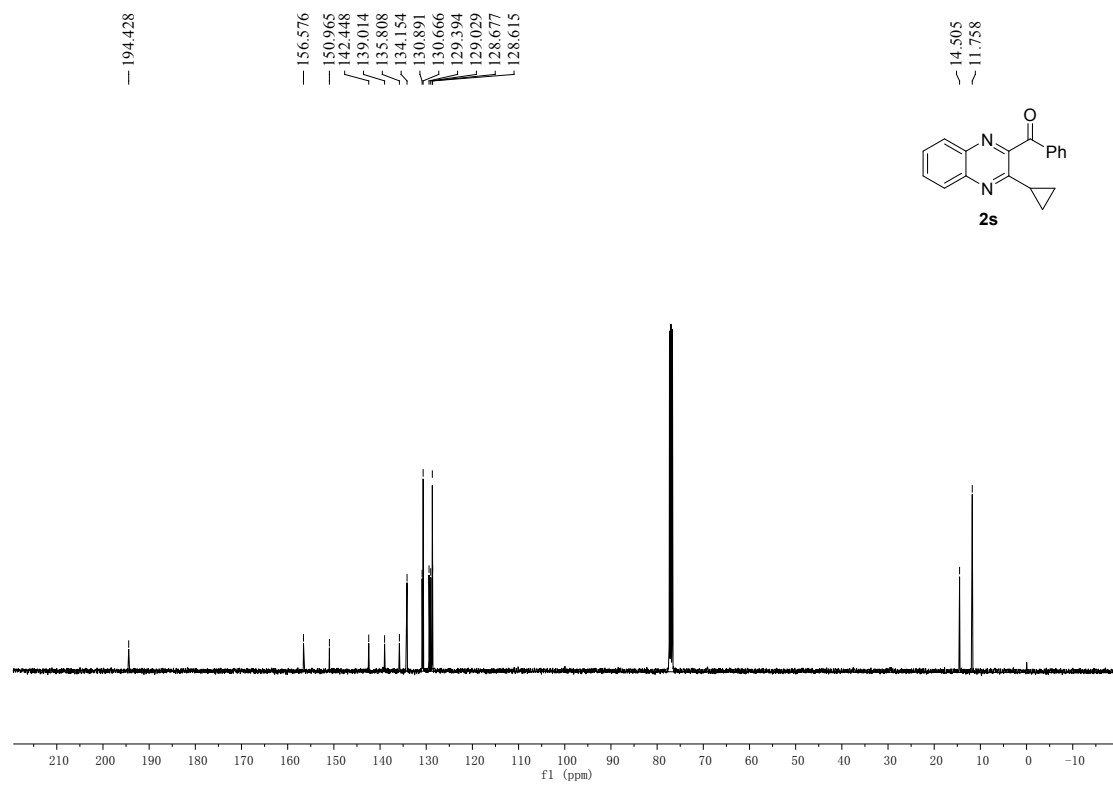

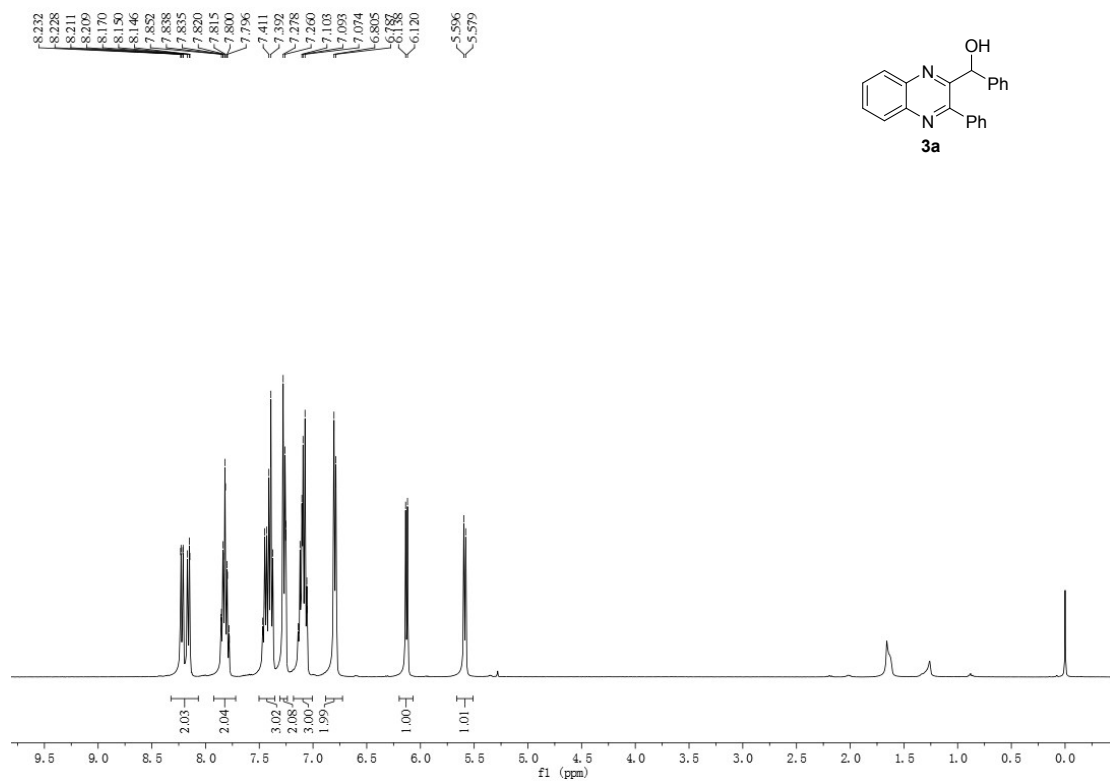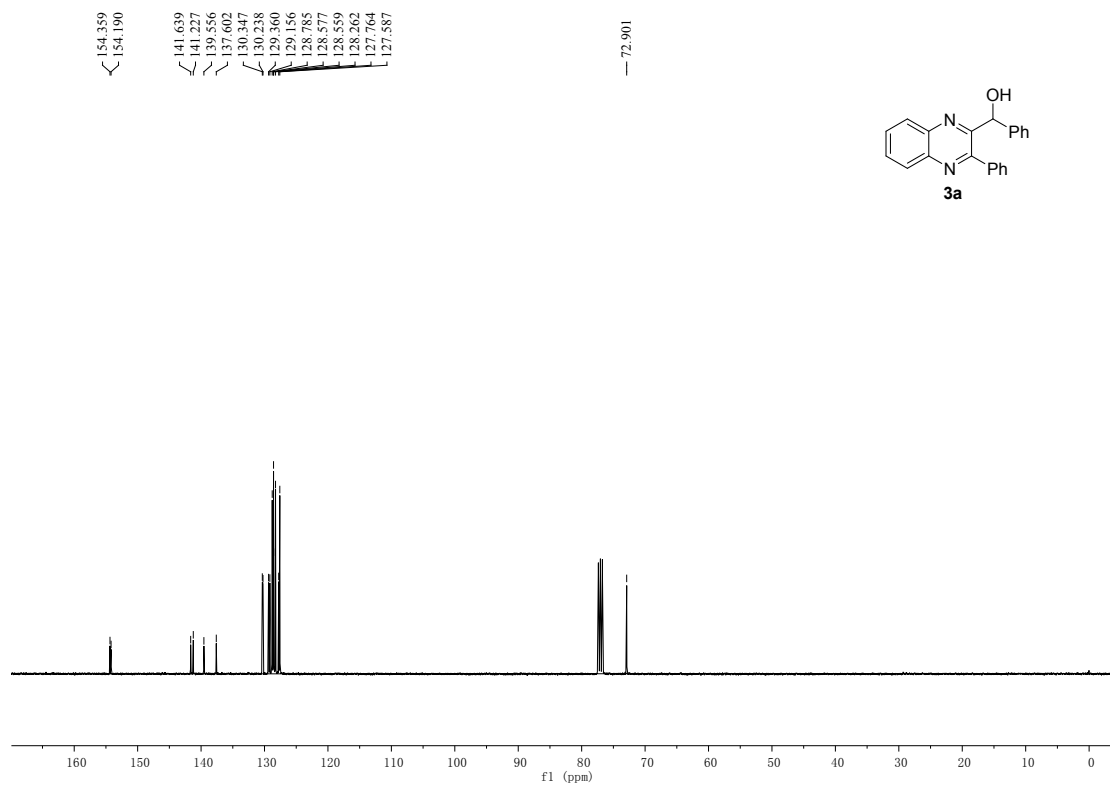

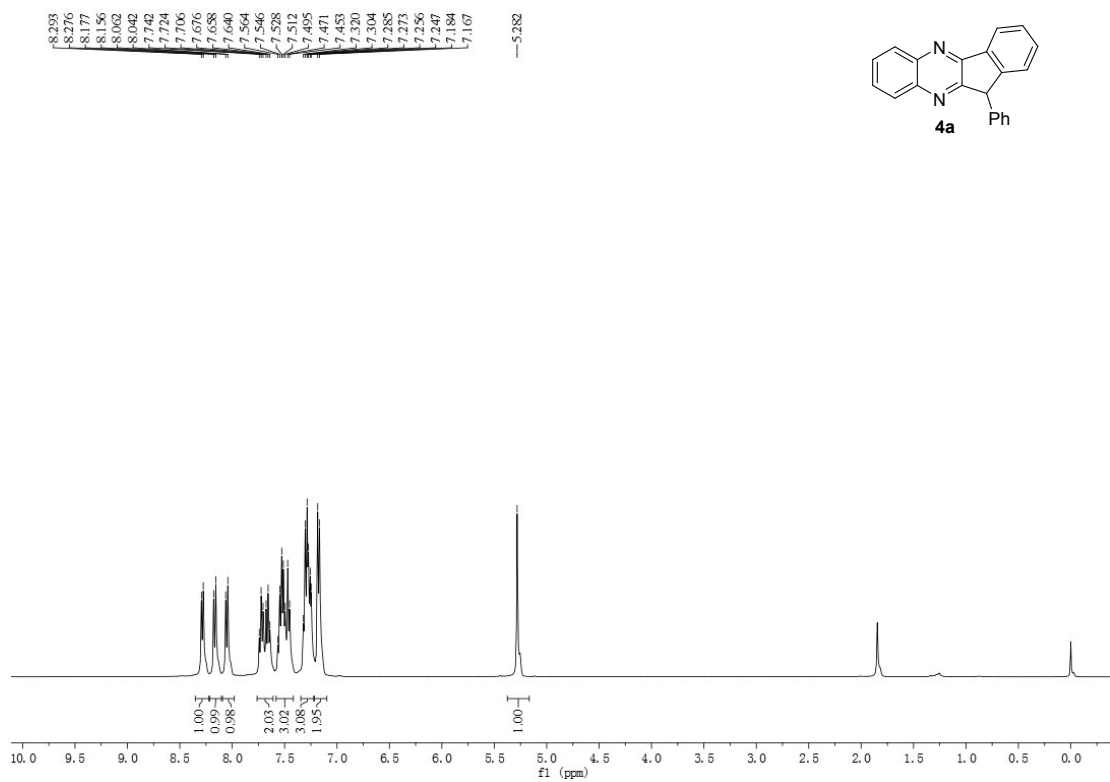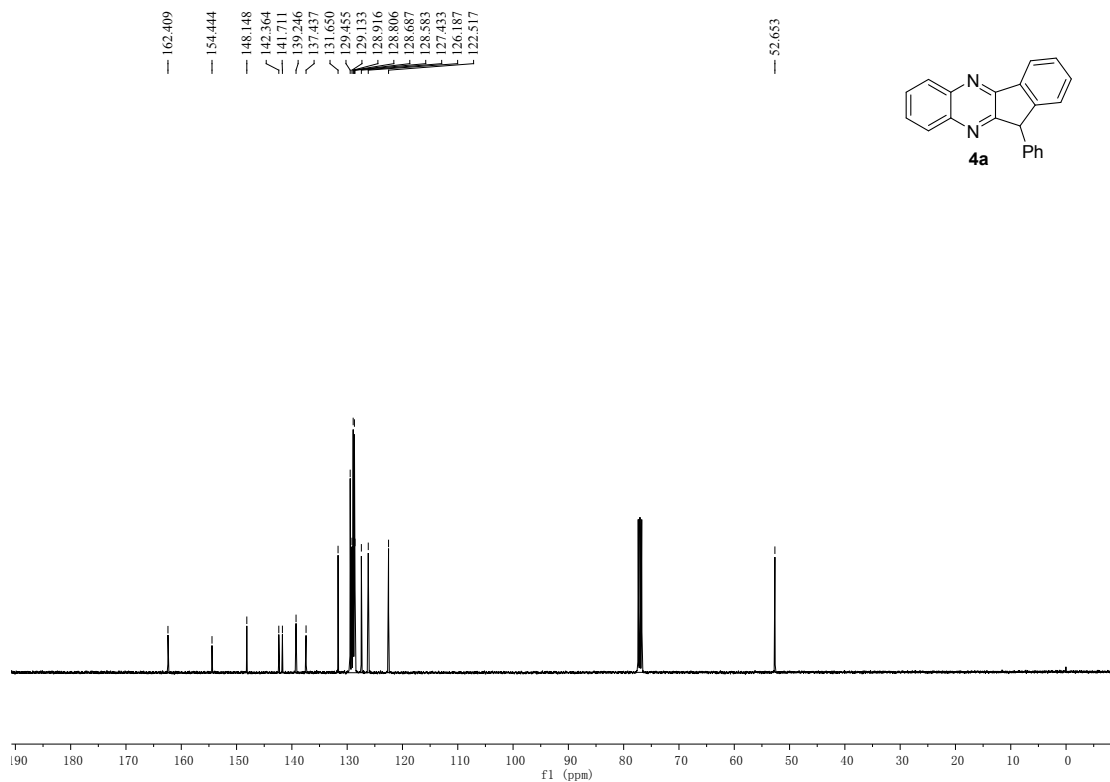

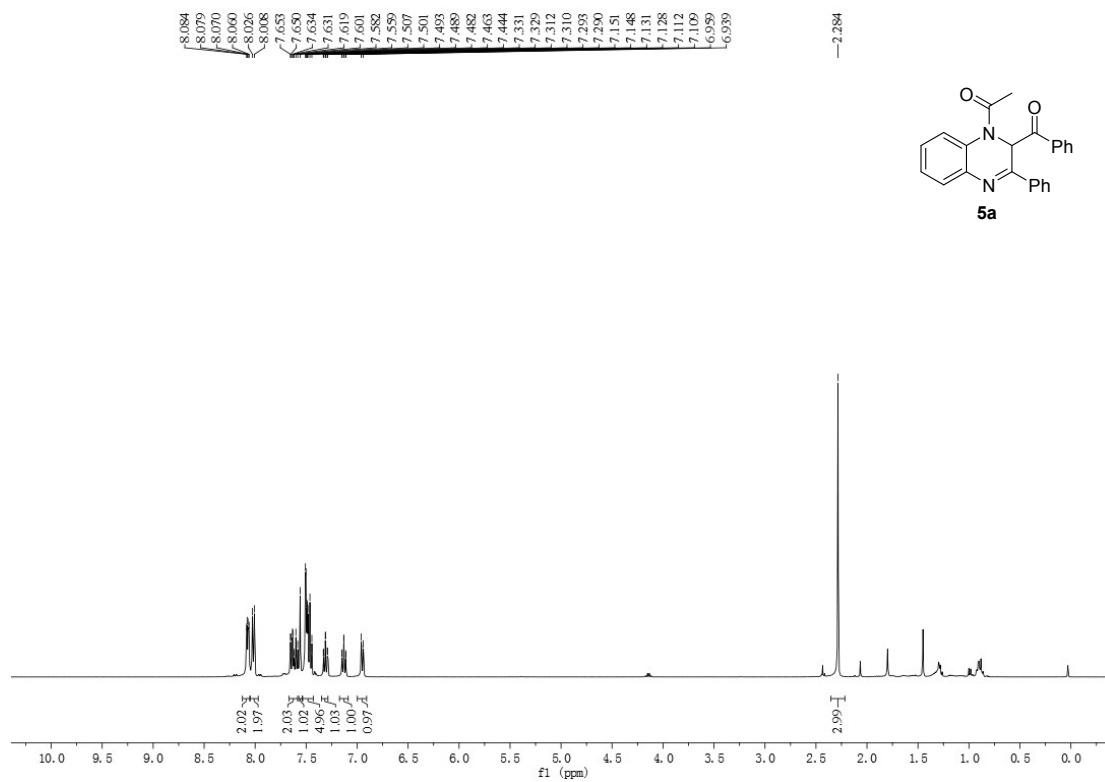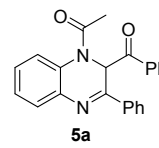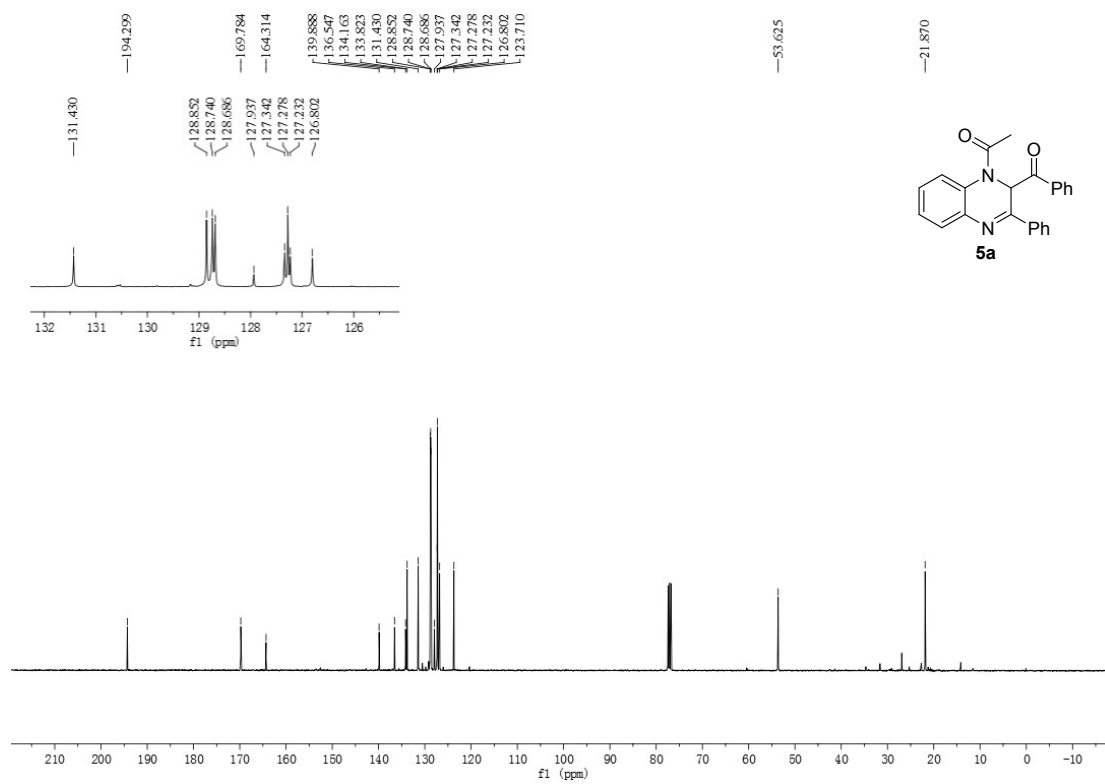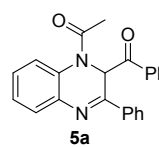

## 7. HRMS spectrum of intermediate C

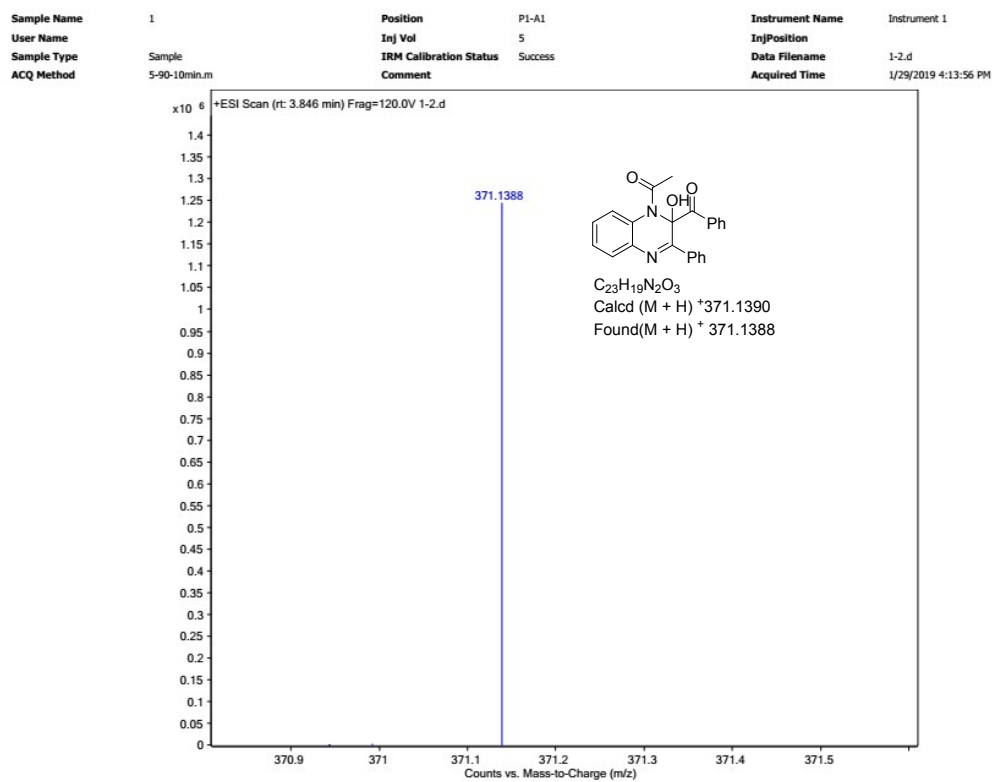

**Figure S1** HRMS spectrum of 1-(2-benzoyl-2-hydroxy-3-phenylquinoxalin-1(2H)-yl)ethan-1-one
